# Supplementary material for: New insights into the performance of human whole-exome capture platforms
Source: PubMed Central journal article supplement (PMC4477645; doi:10.1093/nar/gkv216), 2015-03-27
Supplement: supp_gkv216_nar-03332-met-g-2014-File002.pdf [file supp_gkv216_nar-03332-met-g-2014-File002.pdf]

## SUPPLEMENTARY INFORMATION

### New insights into the performance of human whole-exome capture platforms

Janine Meienberg<sup>1,#</sup>, Katja Zerjavic<sup>1,#</sup>, Irene Keller<sup>2</sup>, Michal Okoniewski<sup>3,4</sup>, Andrea Patrignani<sup>3</sup>, Katja Ludin<sup>5</sup>, Zhenyu Xu<sup>6</sup>, Beat Steinmann<sup>7</sup>, Thierry Carrel<sup>8</sup>, Benno Röthlisberger<sup>5</sup>, Ralph Schlapbach<sup>3</sup>, Rémy Bruggmann<sup>9</sup>, and Gabor Matyas<sup>1,8,10,\*</sup>

<sup>1</sup> Center for Cardiovascular Genetics and Gene Diagnostics, Foundation for People with Rare Diseases, Schlieren-Zurich, CH-8952, Switzerland

<sup>2</sup> Department of Clinical Research, University of Berne, Berne, CH-3010, Switzerland

<sup>3</sup> Functional Genomics Center Zurich, Zurich, CH-8057, Switzerland

<sup>4</sup> Division of Scientific IT Services, ETH Zurich, Zurich, CH-8092, Switzerland

<sup>5</sup> Division of Medical Genetics, Center for Laboratory Medicine, Aarau, CH-5001, Switzerland

<sup>6</sup> Sophia Genetics SA, Lausanne, CH-1015, Switzerland

<sup>7</sup> Division of Metabolism, University Children's Hospital, Zurich, CH-8032, Switzerland

<sup>8</sup> Department of Cardiovascular Surgery, University Hospital, Berne, CH-3010, Switzerland

<sup>9</sup> Interfaculty Bioinformatics Unit and Swiss Institute of Bioinformatics, University of Berne, Berne, CH-3012, Switzerland

<sup>10</sup> Zurich Center of Integrative Human Physiology, University of Zurich, Zurich, CH-8057, Switzerland

\* To whom correspondence should be addressed. Tel: +41 43 433 86 86; Fax: +41 43 433 86 85; Email: matyas@genetikzentrum.ch

# The authors wish it to be known that, in their opinion, the first 2 authors should be regarded as joint First Authors.

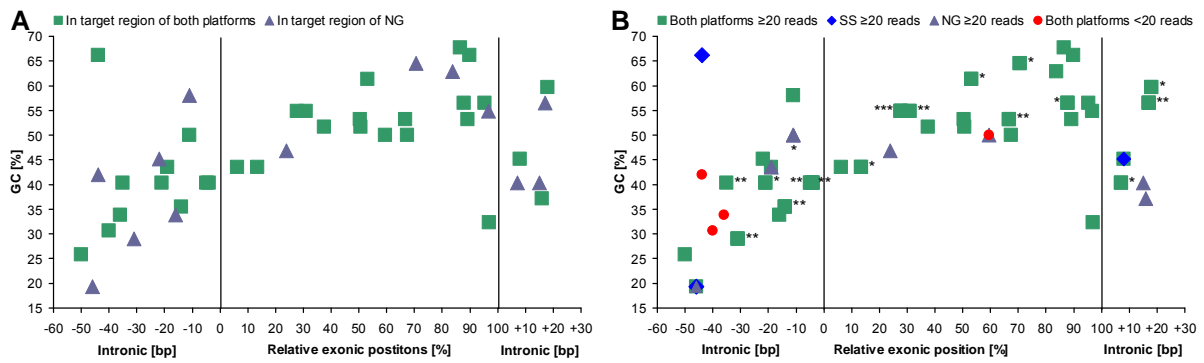

**Figure S1.** Preliminary study: Positions of selected heterozygous sequence variants detected by Sanger sequencing in our region of interest (exons with -50-bp and +20-bp flanking intronic sequences) as a function of the GC content of 30-bp flanking sequences. **(A)** Occurrence of variants in the designed target region of each platform. **(B)** Platforms providing  $\geq 20$  reads at heterozygous variant positions. Note that, contrary to expectations, not all exonic positions are within the designed target region of the Agilent platform. Furthermore, none of the two platforms achieved complete coverage of all exonic positions at  $\geq 20$  reads. Exonic positions are given in percentage [%] relative to the length of the corresponding exon, whereas intronic positions are given as absolute positions in base pairs [bp]. SS, Agilent SureSelect v4+UTR; NG, NimbleGen SeqCap v3; \*, heterozygous in one additional DNA sample with the same symbol; \*\*, heterozygous in two additional DNA samples with the same symbol; \*\*\*, heterozygous in three additional DNA samples with the same symbol.

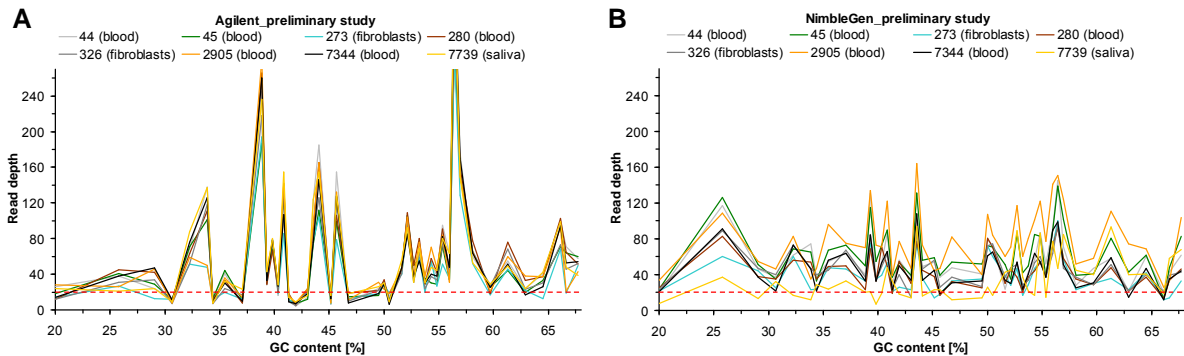

**Figure S2.** Preliminary study: Read depth for 44 different SNV positions within our region of interest (coding exons and -50-bp and +20-bp flanking intronic sequences) called as heterozygous in at least one of the eight samples (the six samples from this study as well as 45 and 273) plotted against the GC content of 30-bp flanking sequences. **(A)** Agilent (SureSelect Human All Exon kit v4+UTR). **(B)** NimbleGen (SeqCap EZ Exome v3). Red dashed line indicates our limit of 20 reads. Note the high number of positions failed to reach the limit of 20 reads by the Agilent platform.

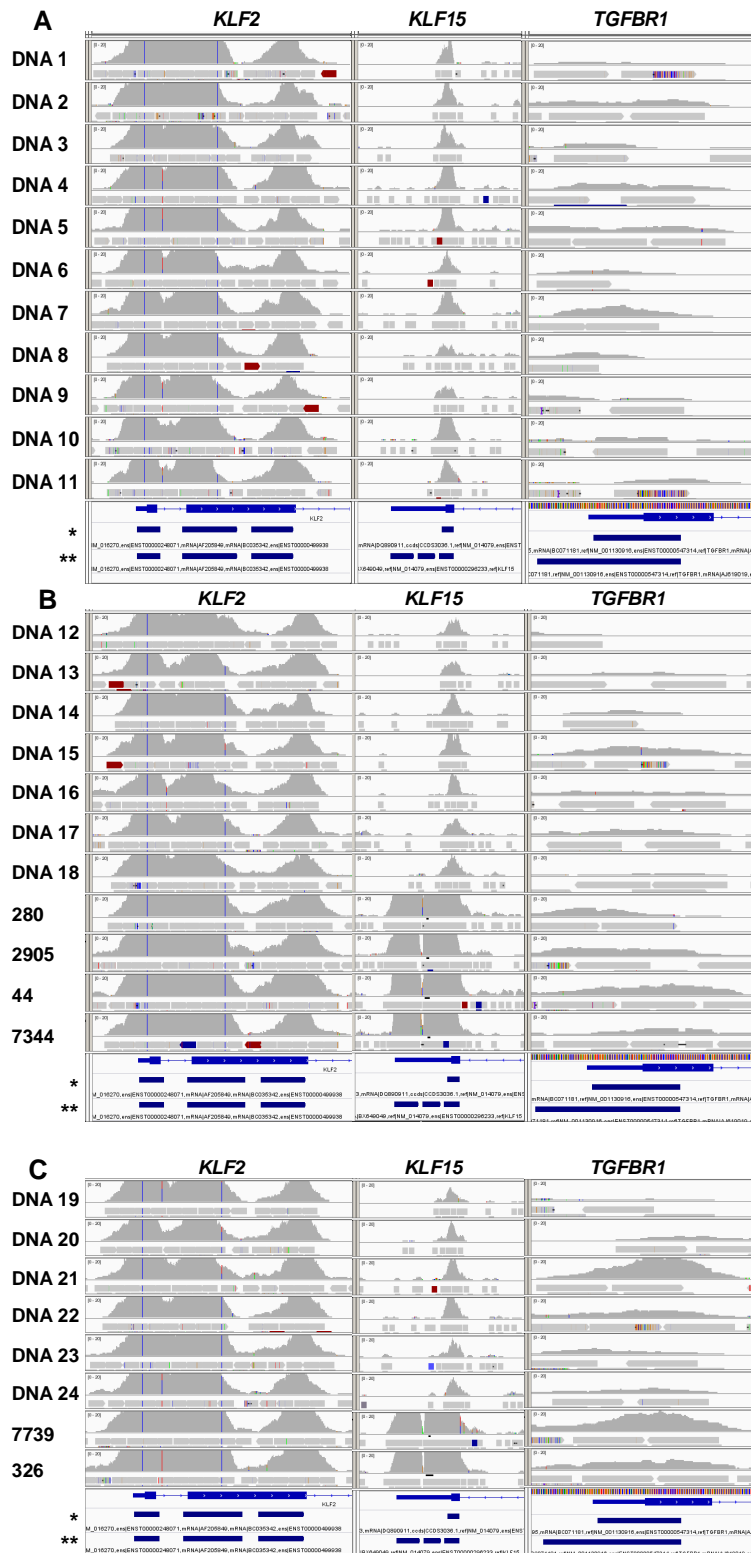

Although DNA samples extracted from blood performed slightly better, no distinct performance difference among the 24 additional DNA samples sequenced at 60× using Agilent was observed in selected GC-rich exons of *KLF2*, *KLF15*, and *TGFBR1*, confirming our observations on the six samples sequenced at 100× using Agilent. Unexpectedly, for one extremely GC-rich (83%) exon, which was not covered sufficiently even when sequenced at 100×, one DNA extracted from saliva and sequenced at 60× achieved a mean of 18 reads (*TGFBR1* in DNA 21).

**Figure S3.** Comparison of enrichment efficiency for GC-rich exons in the six samples of the present study and 24 additional DNA samples. Integrative Genomics Viewer (IGV) print screens showing coverage track (0-20 reads) for *KLF2* exons 1 and 2, *KLF15* exon 3, and *TGFBR1* exon 1, which have high GC content. (A, B) DNA samples extracted from blood. (C) DNA samples extracted from saliva (DNA 19-24, 7739) or fibroblasts (326). For the six samples of this study (44, 280, 326, 2905, 7344, 7739), WES data of V2 using Agilent SureSelect v5+UTR at 100× are shown. The additional 24 samples (DNA 1-24) were sequenced by V2 using Agilent SureSelect v5 at 60×. \*, designed target region of Agilent SureSelect v5; \*\*, designed target region of Agilent SureSelect v5+UTR.

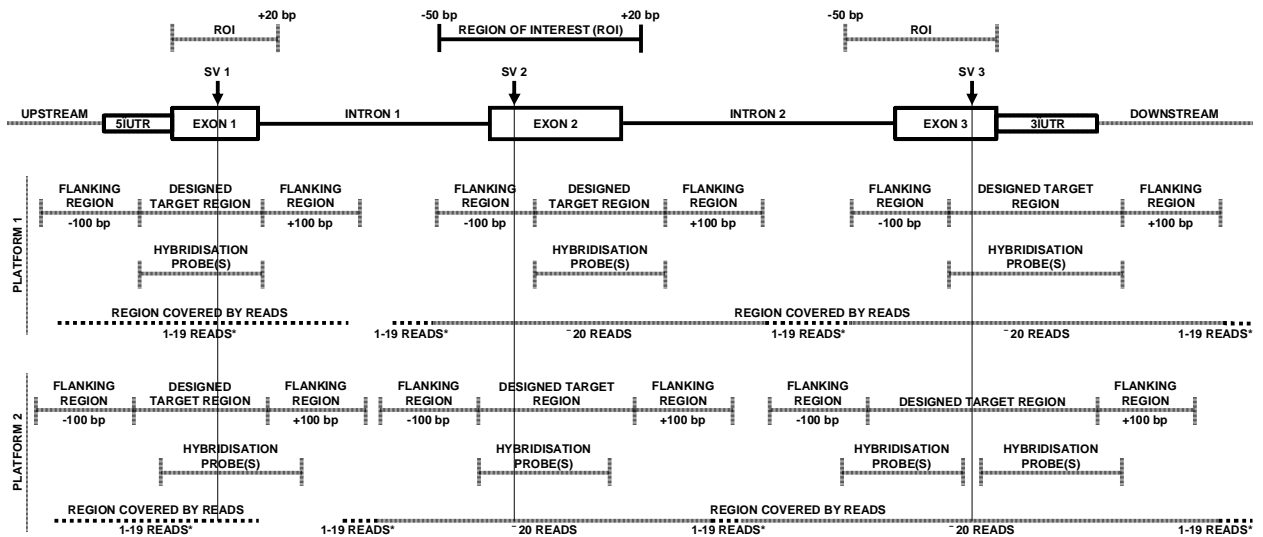

**Figure S4.** Schematic presentation of terms used in this study. SV, sequence variant; \*insufficient coverage e.g. due to GC-rich regions or distance to hybridisation probes; closed lines, regions with defined length and positions; open lines, regions with variable length and positions. Note that according to Agilent's definition the designed target region is completely covered by hybridisation probes (cf. platform 1), whereas NimbleGen and Illumina define it as the region intended/designed to be enriched (cf. platform 2).

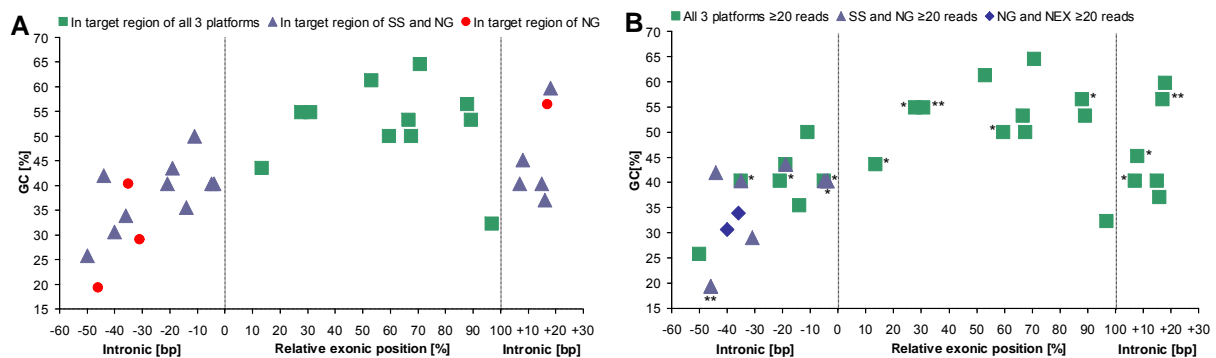

**Figure S5.** Positions of selected heterozygous sequence variants detected by Sanger sequencing in a region of interest most relevant for mutation screening (exons with -50-bp and +20-bp flanking intronic sequences) as a function of the GC content of 30-bp flanking sequences. **(A)** Occurrence of variants in the designed target region of each platform. **(B)** Platforms providing  $\geq 20$  reads at heterozygous variant positions (results per vendor are shown in Supplementary Figure S6). Note that all exonic positions are in designed target regions and completely covered by all three enrichment platforms with  $\geq 20$  reads and that Agilent and particularly Illumina covered variants outside its designed target region with  $\geq 20$  reads. Exonic positions are given in percentages [%] relative to the length of the corresponding exon, whereas intronic positions are given as absolute positions in base pairs [bp]. SS, Agilent SureSelect v5+UTR; NG, NimbleGen SeqCap v3+UTR; NEX, Illumina Nextera Expanded Exome; \*, heterozygous in one additional DNA sample with the same symbol; \*\*, heterozygous in two additional DNA samples with the same symbol.

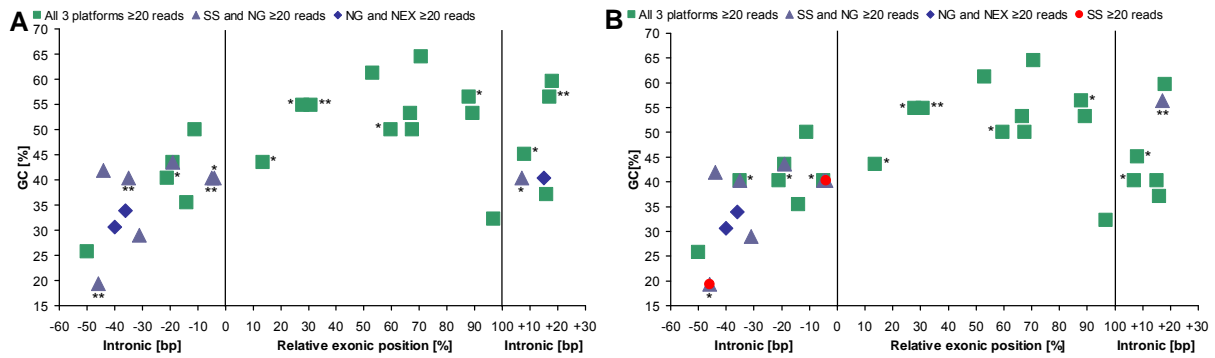

**Figure S6.** Enrichment performance per vendor for selected heterozygous sequence variants detected by Sanger sequencing in our region of interest (exons with -50-bp and +20-bp flanking intronic sequences) as a function of the GC content of 30-bp flanking sequences. **(A)** Platforms performed by the same vendor (V1) providing  $\geq 20$  reads at heterozygous variant positions. **(B)** Platforms performed by different vendors (V2-V4) providing  $\geq 20$  reads at heterozygous variant positions. Note that all exonic positions are completely covered by all three enrichment platforms with  $\geq 20$  reads (regardless of vendor). Exonic positions are given in percentage [%] relative to the length of the corresponding exon, whereas intronic positions are given as absolute positions in base pairs [bp]. SS, Agilent SureSelect v5+UTR; NG, NimbleGen SeqCap v3+UTR; NEX, Illumina Nextera Expanded Exome; \*, heterozygous in one additional DNA sample with the same symbol; \*\*, heterozygous in two additional DNA samples with the same symbol.

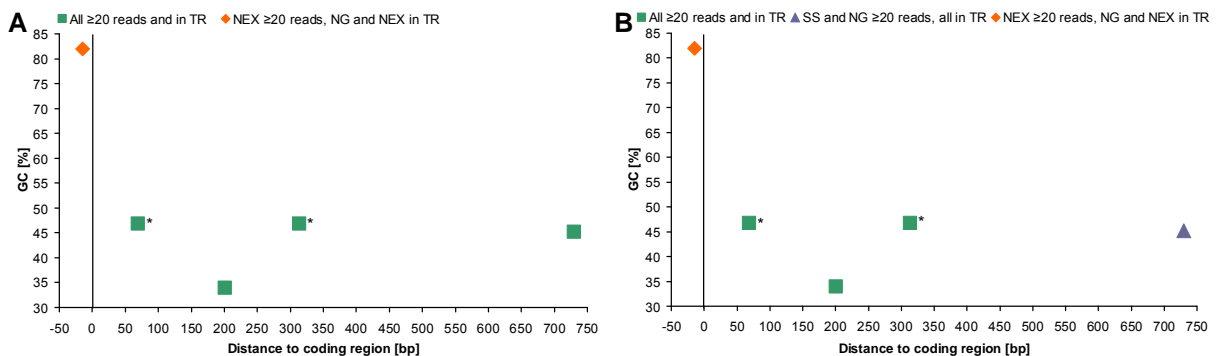

**Figure S7.** Enrichment performance per vendor for DNA samples with selected heterozygous sequence variants detected by Sanger sequencing in UTR as a function of the GC content of 30-bp flanking sequences. **(A)** Results of the same vendor for all platforms (V1). **(B)** Data of different vendors (V2-V4). Positions of variants are given as distance to coding region in base pairs [bp] (i.e. -50 to -1 for 5'UTR and 1 to 750 for 3'UTR). TR, designed target region; SS, Agilent SureSelect v5+UTR; NG, NimbleGen SeqCap v3+UTR; NEX, Illumina Nextera Expanded Exome; \*, heterozygous in one additional DNA sample with the same symbol. Note that one variant position in a GC-rich (82%) exon (orange) is located within the designed target region of both NimbleGen (NG) and Illumina (NEX) but is only covered by Illumina (NEX) at 20 $\times$  (regardless of vendor).

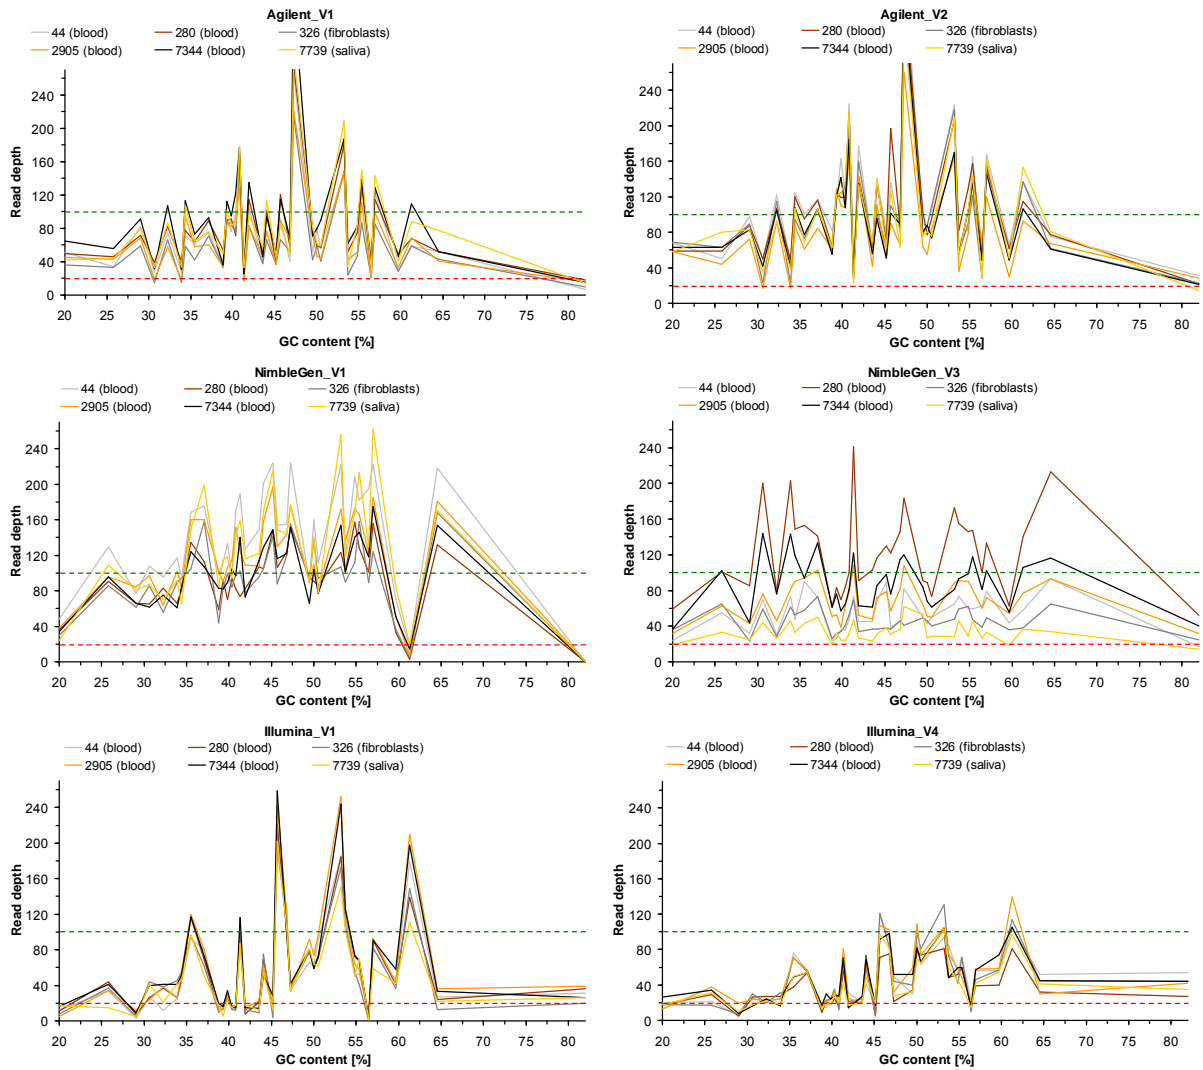

**Figure S8.** Read depth of all six DNA samples for 30 different SNV positions within our region of interest (coding exons and -50-bp and +20-bp flanking intronic sequences) and five in UTR plotted against the GC content of 30-bp flanking sequences. Green dashed lines indicate expected read depth of 100 (reads) and red dashed lines denote read depth of 20 (reads). Note the performance of Agilent and NimbleGen compared to Illumina as well as the intersample variation in the performance of V3 using the NimbleGen platform.

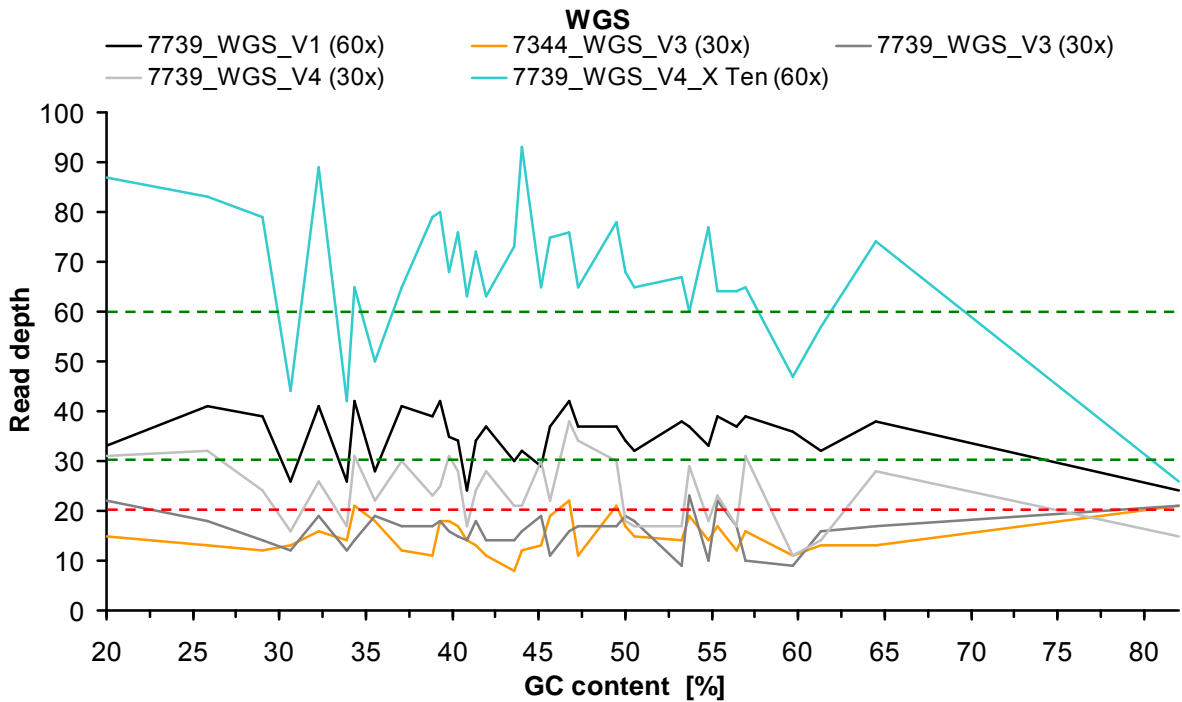

**Figure S9.** Read depth of all five WGS data sets for 30 different SNV positions within our region of interest (coding exons and -50-bp and +20-bp flanking intronic sequences) and five in UTR plotted against the GC content of 30-bp flanking sequences. Green dashed lines indicate expected read depth of 60 and 30 (reads), respectively, and red dashed line denotes read depth of 20 (reads). Note that at 30× V4 performed better than V3 and that only WGS data at 60× (V1 and V4\_X Ten) reached for all positions the limit of 20 reads (cf. Supplementary Figure S17). X Ten, HiSeq X Ten system.

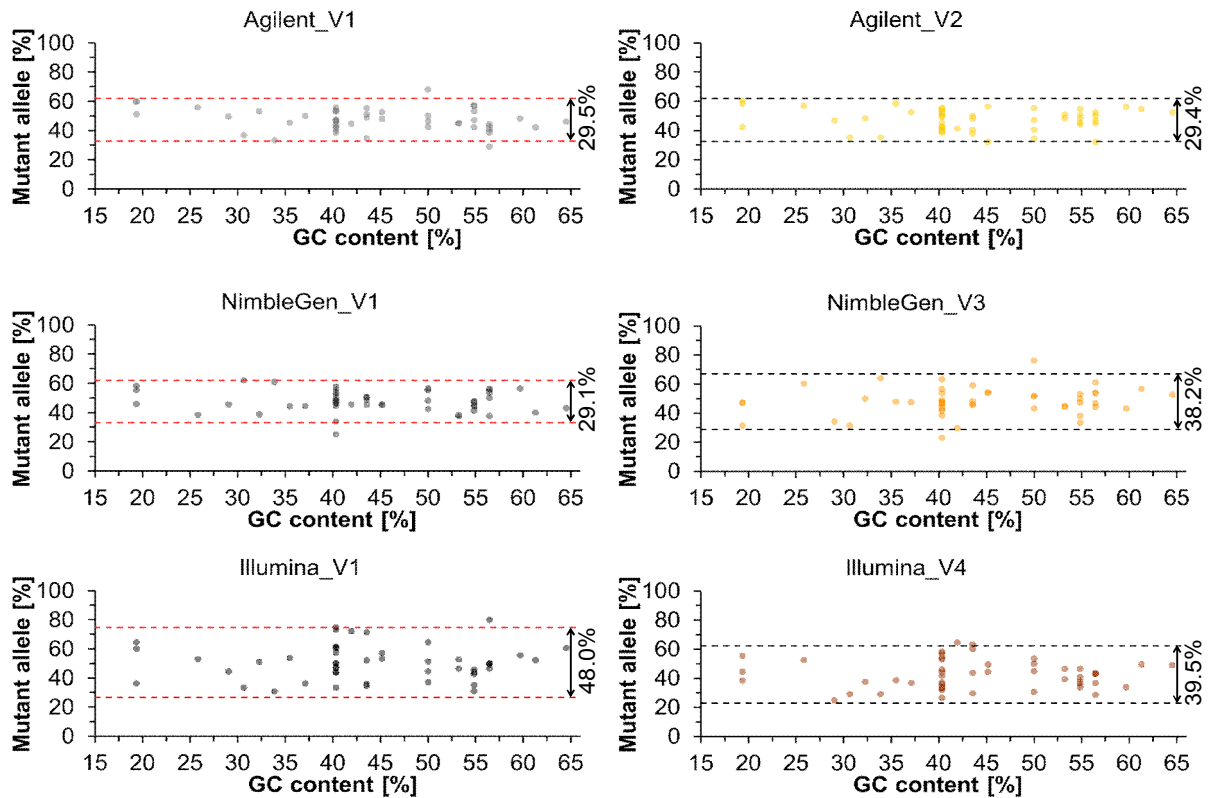

**Figure S10.** Percentage of non-reference (mutant) alleles called for heterozygous variants detected by Sanger sequencing in our region of interest (exons with -50-bp and +20-bp flanking intronic sequences) displayed for all six platform-vendor combinations. 30 different heterozygous SNVs listed according to GC content of 30-bp flanking sequences. Shown are values of all six DNA samples. Dashed lines indicate an interval within which 95% of the percentage values of non-reference alleles lie (calculated according to the Student's  $t$  distribution as the mean of  $n$  percentage values  $\pm$  critical  $t$  value ( $t_{crit,n-1}$ )  $\times$   $SD$  using  $n = 49$ ,  $t_{crit} = 2.011$ ).



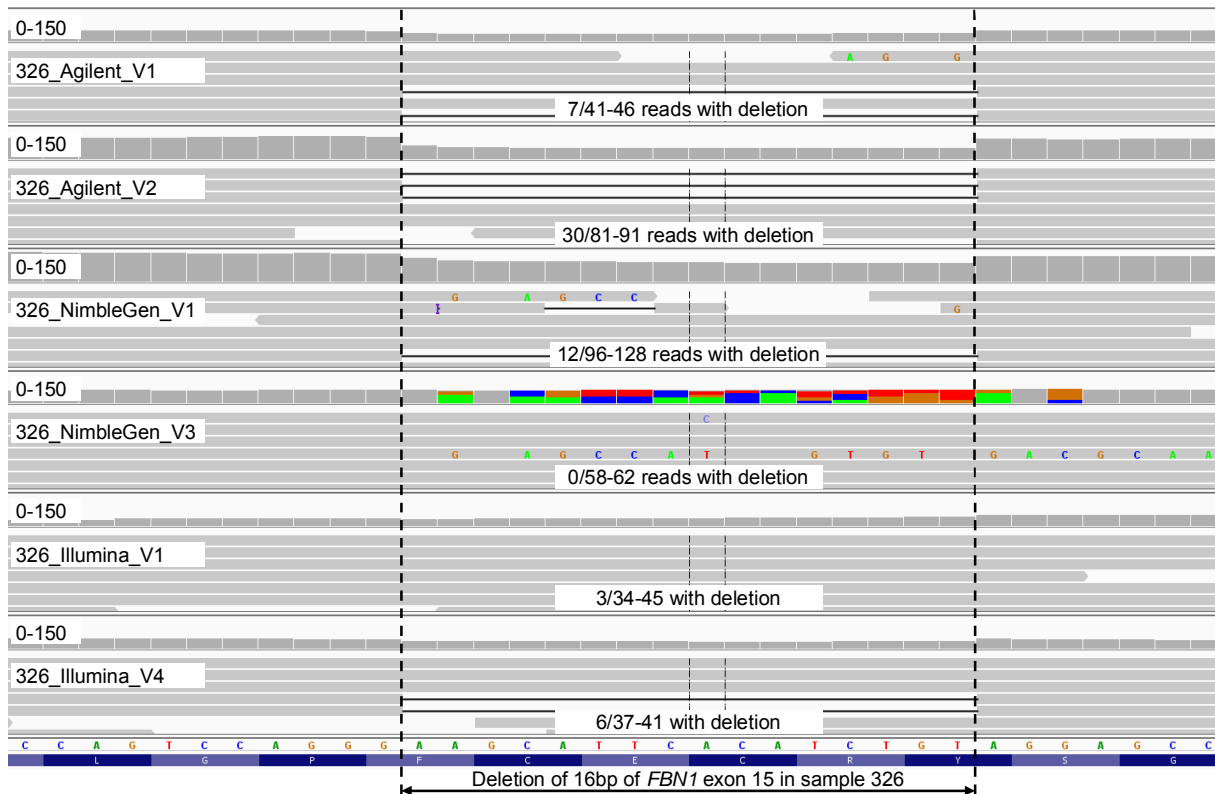

**Figure S11.** Aligned reads for a heterozygous exonic deletion of 16 bp. Sections of six reads per data set covering the deleted region in sample 326 are presented using the Integrative Genomics Viewer (IGV). Gray bars/arrows denote aligned reads, letters indicate mismatched bases, and black horizontal lines represent deletions. Display range for read depth is set to 0-150 and counts only called bases (no deletions). Coloured bars indicate called mismatches. Note that in the data of V3 using NimbleGen the deleted alleles are called as a series/consecutive of mismatches rather than a deletion, most likely due to the bioinformatics data analysis workflow of V3 (e.g., improper realignment of the region) and that V2 using Agilent called the largest fraction of reads with this deletion.

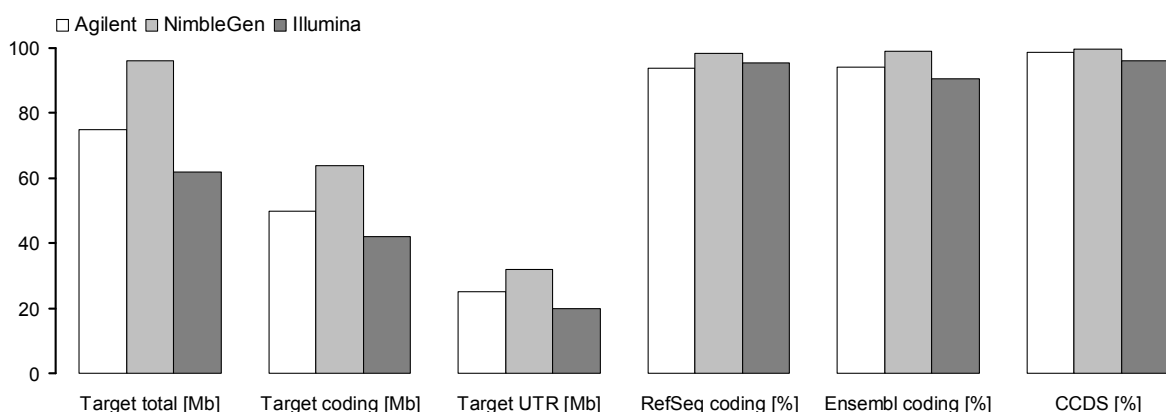

**Figure S12.** Designed target regions of the three updated exome enrichment platforms. Total number of bases within the designed target region (target total), its distribution on coding (target coding) and untranslated regions (target UTR), and coverage of coding exons of the gene databases RefSeq, Ensembl, and CCDS are presented for Agilent (SureSelect v5+UTR), NimbleGen (SeqCap v3+UTR), and Illumina (Nextera Expanded Exome) according to the companies' specifications (Supplementary Table S2). CCDS, Consensus Coding Sequences.

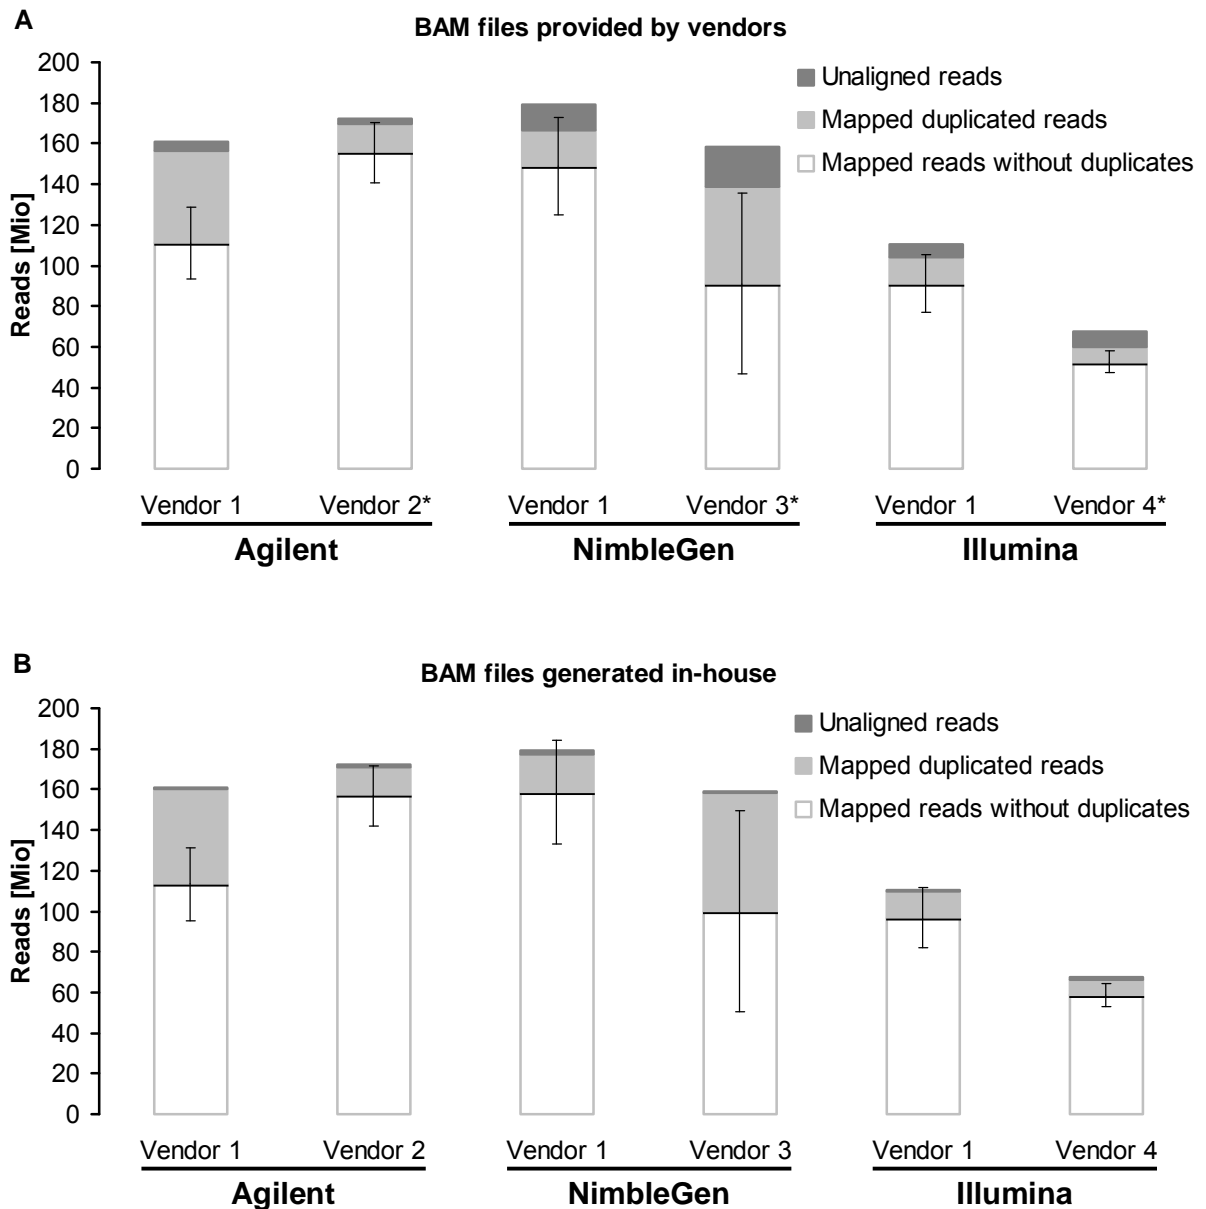

**Figure S13.** Reads generated using the three different enrichment platforms (Agilent, NimbleGen, and Illumina) applied by different vendors. **(A, B)** Number of unaligned reads, mapped duplicated reads, and remaining reads used for analysis (mapped reads without duplicates) according to BAM files provided by vendors **(A)** and in-house generated BAM files using the same bioinformatics pipeline **(B)**. \*Note that bioinformatics workflow is different among vendors and that vendor 3 and vendor 4 provided unique mapped reads in contrast to total mapped reads (cf. Supplementary Table S3). Given are means of all six DNA samples (n=6); error bars indicate 95% confidence intervals.

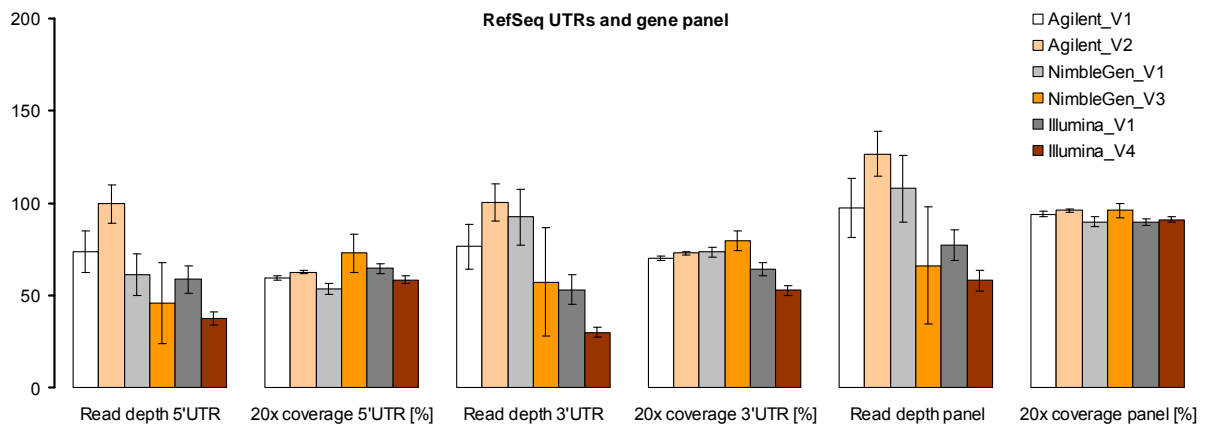

**Figure S14.** Enrichment efficiency of the three updated exome enrichment platforms (Agilent, NimbleGen, and Illumina) performed by different vendors (V1, V2, V3, and V4) for UTR of RefSeq exons and a panel of eight genes (cf. Supplementary Figure S27 for data on a larger set of clinically relevant exons). Mean read depth and percentage of coverage at 20× for 5'UTR and 3'UTR of the RefSeq database as well as for exons (coding and UTR) of our panel of eight genes (panel) specified in Supplementary Table S1. Given are means of all six DNA samples; error bars indicate 95% confidence intervals. Values were calculated using the SeqMonk program ([www.bioinformatics.babraham.ac.uk/projects/seqmonk](http://www.bioinformatics.babraham.ac.uk/projects/seqmonk)) and are presented in Supplementary Tables S6, S12, S14, and S15.

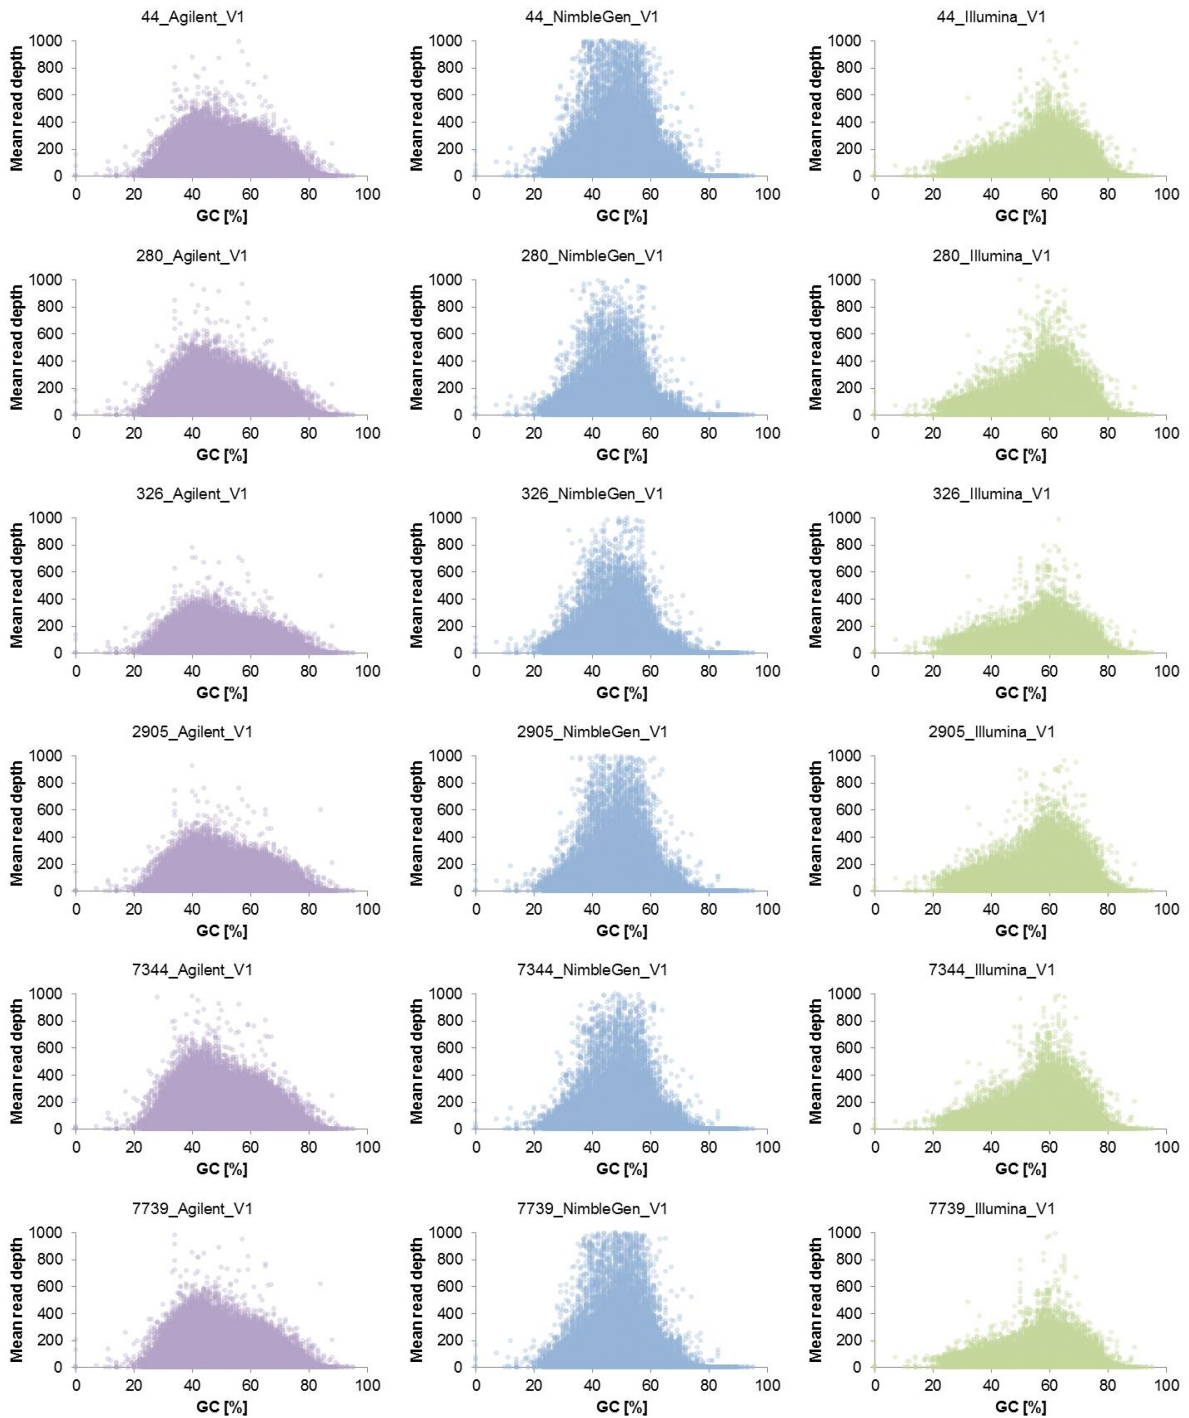

**Figure S15.** Enrichment bias in terms of read depth owing to GC content for the three enrichment platforms (Agilent, NimbleGen, Illumina) performed by the same vendor (V1). Scatter plots showing GC content and achieved read depth of RefSeq exons (coding and UTR).

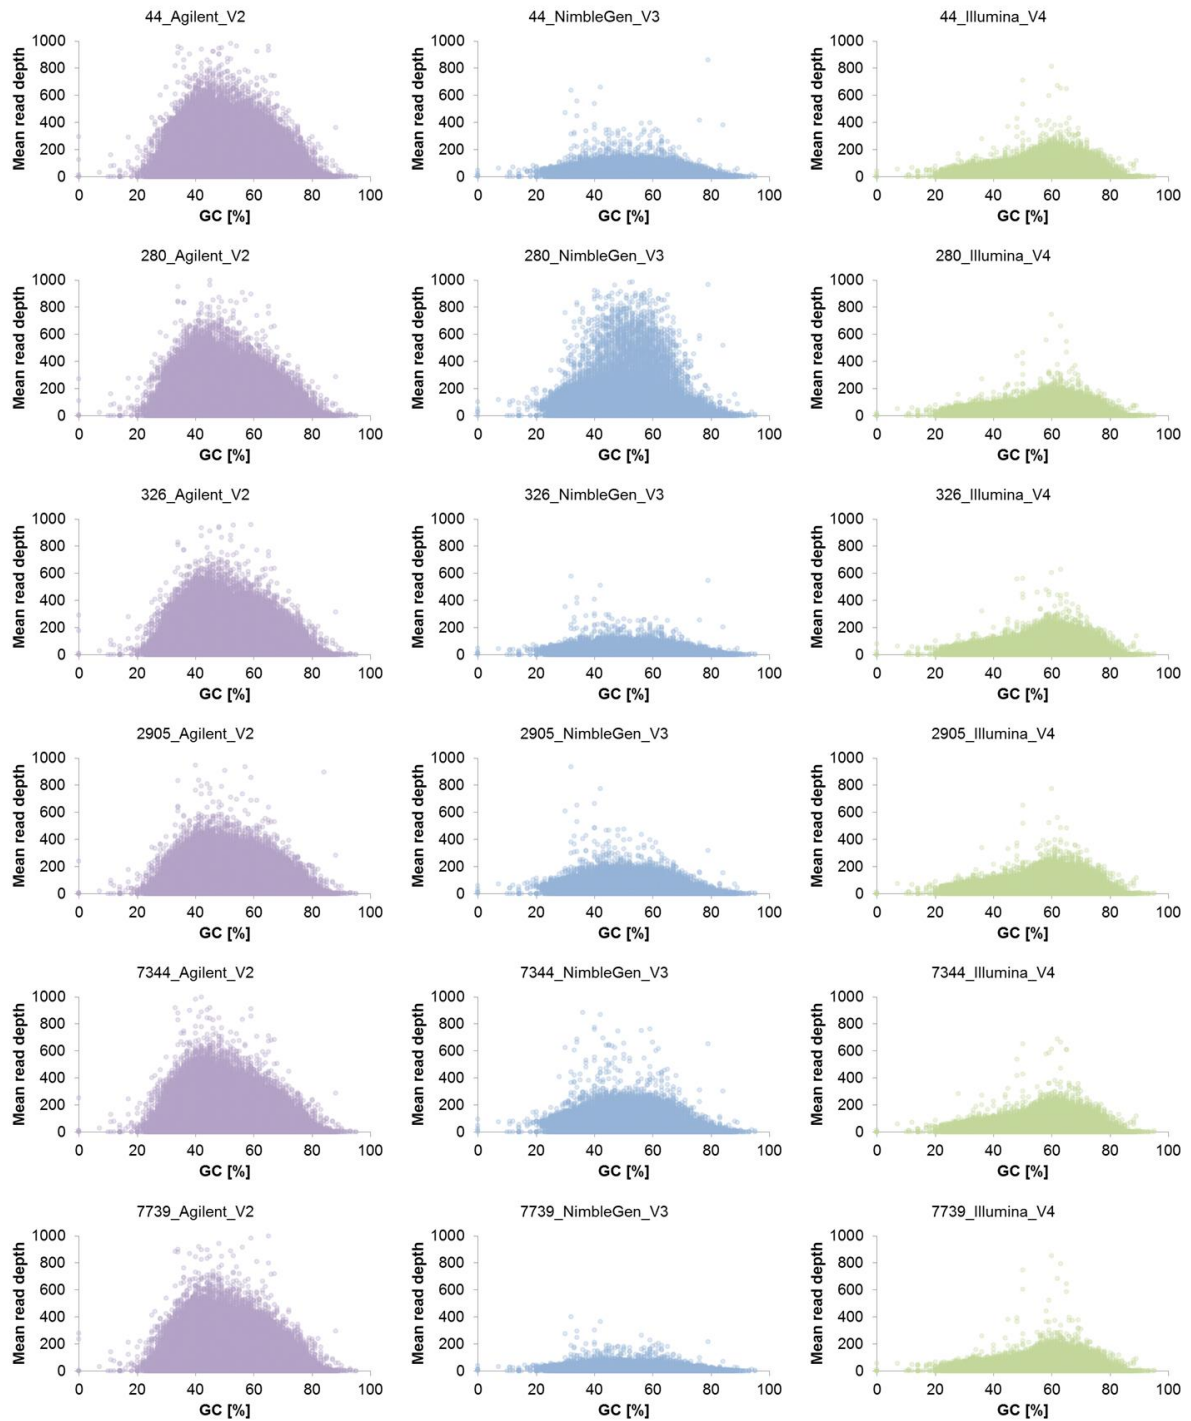

**Figure S16.** Enrichment bias in terms of read depth owing to GC content for the three enrichment platforms (Agilent, NimbleGen, Illumina) performed by different vendors (V2-V4). Scatter plots showing GC content and achieved read depth of RefSeq exons (coding and UTR).

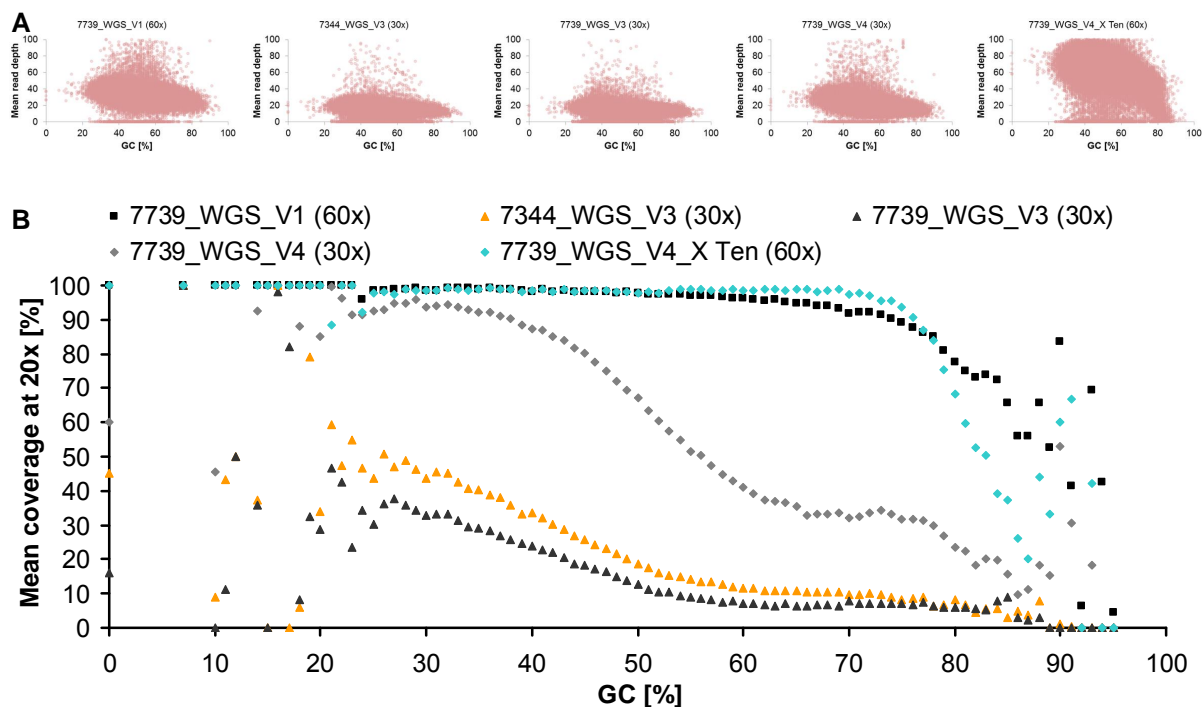

**Figure S17.** Influence of GC content on the mean read depth and coverage of RefSeq exons in whole genome sequencing (WGS). **(A)** Scatter plots showing GC content and achieved mean read depth. **(B)** Mean coverage at 20× per GC content. Data are shown for RefSeq exons (coding and UTR) for all five WGS data sets, i.e. for 7739 sequenced by V1 at 60× and by V3 and V4 at 30× as well as for 7344 sequenced by V3 at 30× on HiSeq2000/2500 using Illumina’s TruSeq DNA PCR-Free Sample Preparation Kit and for 7739 sequenced by V4 at 60× on a HiSeq X Ten system using Illumina’s TruSeq Nano DNA Sample Preparation Kit. Note: GC-rich exons were better covered by WGS than by WES, thereby WGS performed by V3 resulted in comparable coverage for both samples in spite of different DNA sources, whereas V4 showed better WGS performance at 30× than V3 and, as expected, WGS at 60× was superior to sequencing at 30× (cf. PCR-free sample preparation (V1) performed better than TruSeq Nano (V4\_X Ten), especially above 80% GC content).

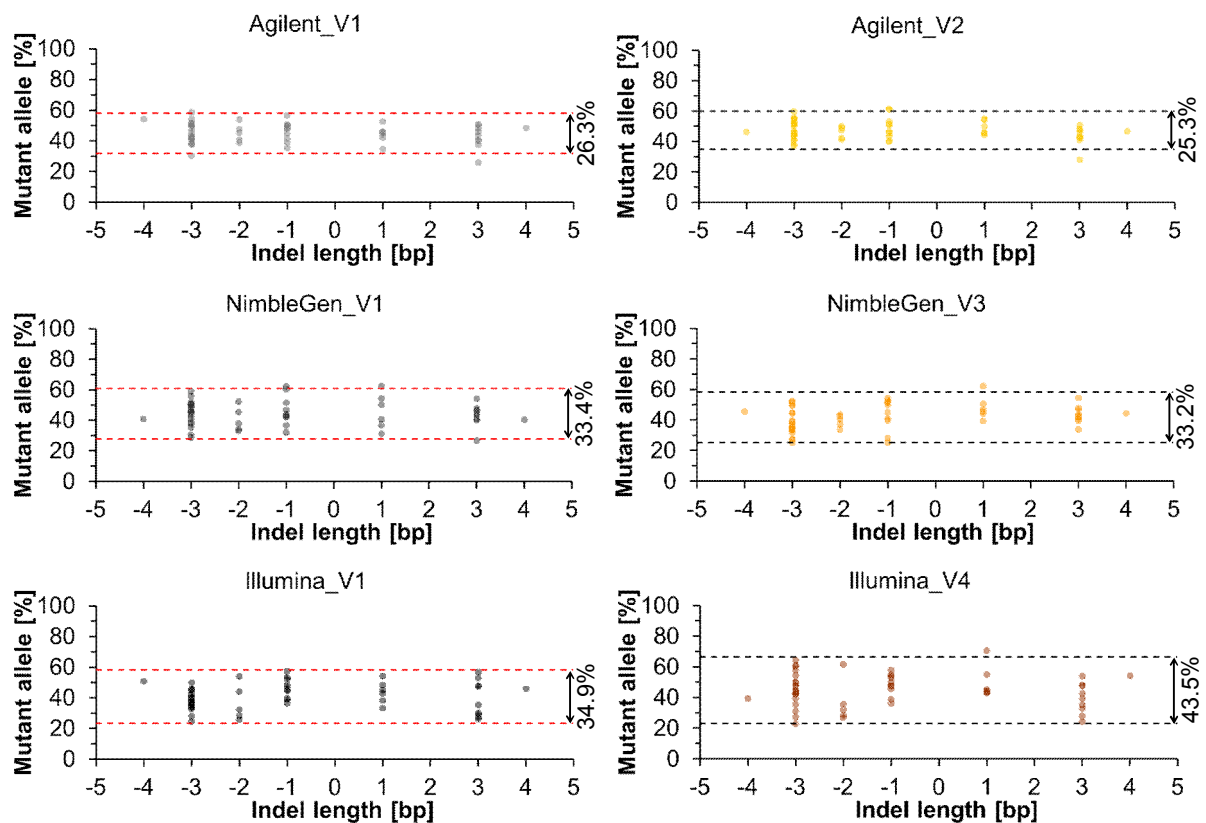

**Figure S18.** Relative proportion of non-reference (mutant) alleles for indels called in the VCF files provided by vendors (V1-V4). The analysis was restricted to shared heterozygous variants within the designed target regions of the three platforms (Agilent, NimbleGen, and Illumina) located in exons completely (100%) covered at 20 $\times$  by all six platform-vendor combinations. Heterozygous indels listed according to their length, thereby negative and positive values indicate deletions and insertions, respectively. Shown are values of all six DNA samples. Dashed lines indicate an interval within which 95% of the percentage values of non-reference alleles lie (calculated according to the Student's  $t$  distribution as the mean of  $n$  percentage values  $\pm$  critical  $t$  value ( $t_{\text{crit},n-1}$ )  $\times$   $SD$  using  $n = 51$ ,  $t_{\text{crit}} = 2.009$ ).

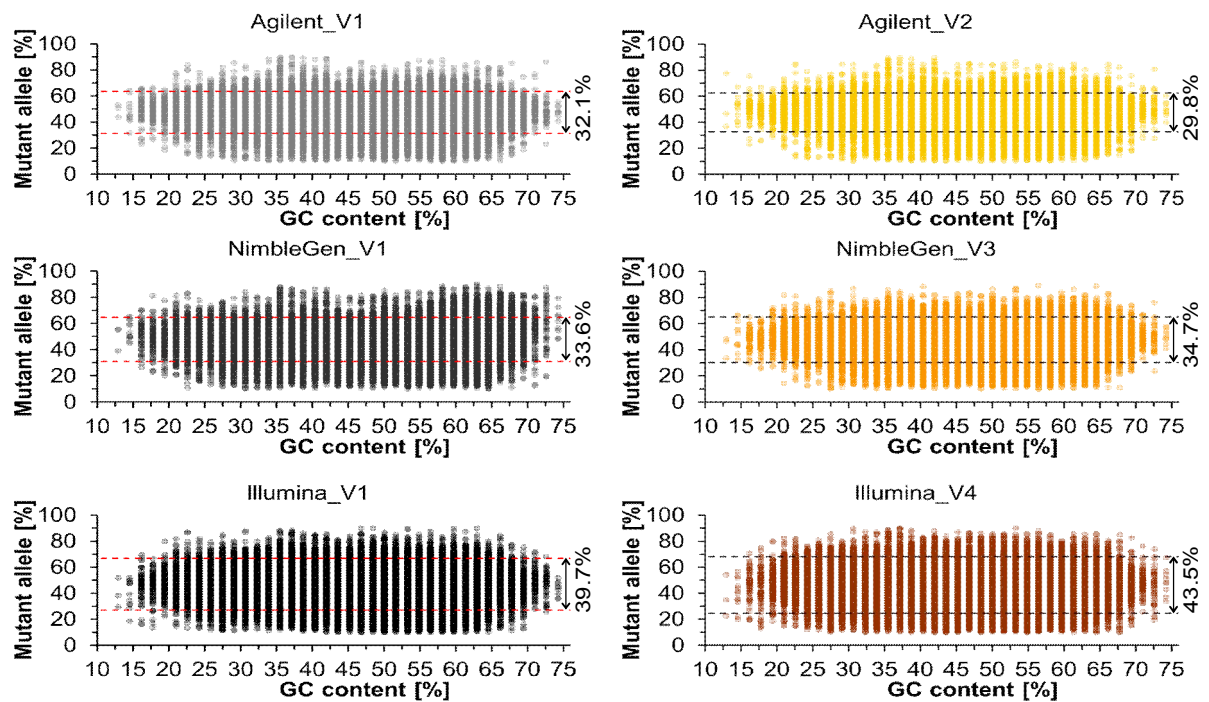

**Figure S19.** Percentages of non-reference (mutant) alleles for heterozygous SNVs called in our gVCF files generated by the same in-house bioinformatics pipeline for all six platform-vendor combinations. Fraction of biallelic non-reference alleles for shared heterozygous variants within the platforms' designed target region and 50-bp flanking sequences achieving  $\geq 20$  reads and  $> 30$  quality scores by all six platform-vendor combinations are displayed according to the GC content of 30-bp flanking sequences. Shown are values of all six DNA samples. Variant positions with more than one different non-reference allele (non-biallelic) as well as variant calls with alternative allele percentages outside 10-90% were excluded. Dashed lines indicate an interval within which 95% of the percentage values of non-reference alleles lie (calculated according to the Student's  $t$  distribution as the mean of  $n$  percentage values  $\pm$  critical  $t$  value ( $t_{crit,n-1}$ )  $\times$   $SD$  using  $n = 92'158$ ,  $t_{crit} = 1.960$ ).



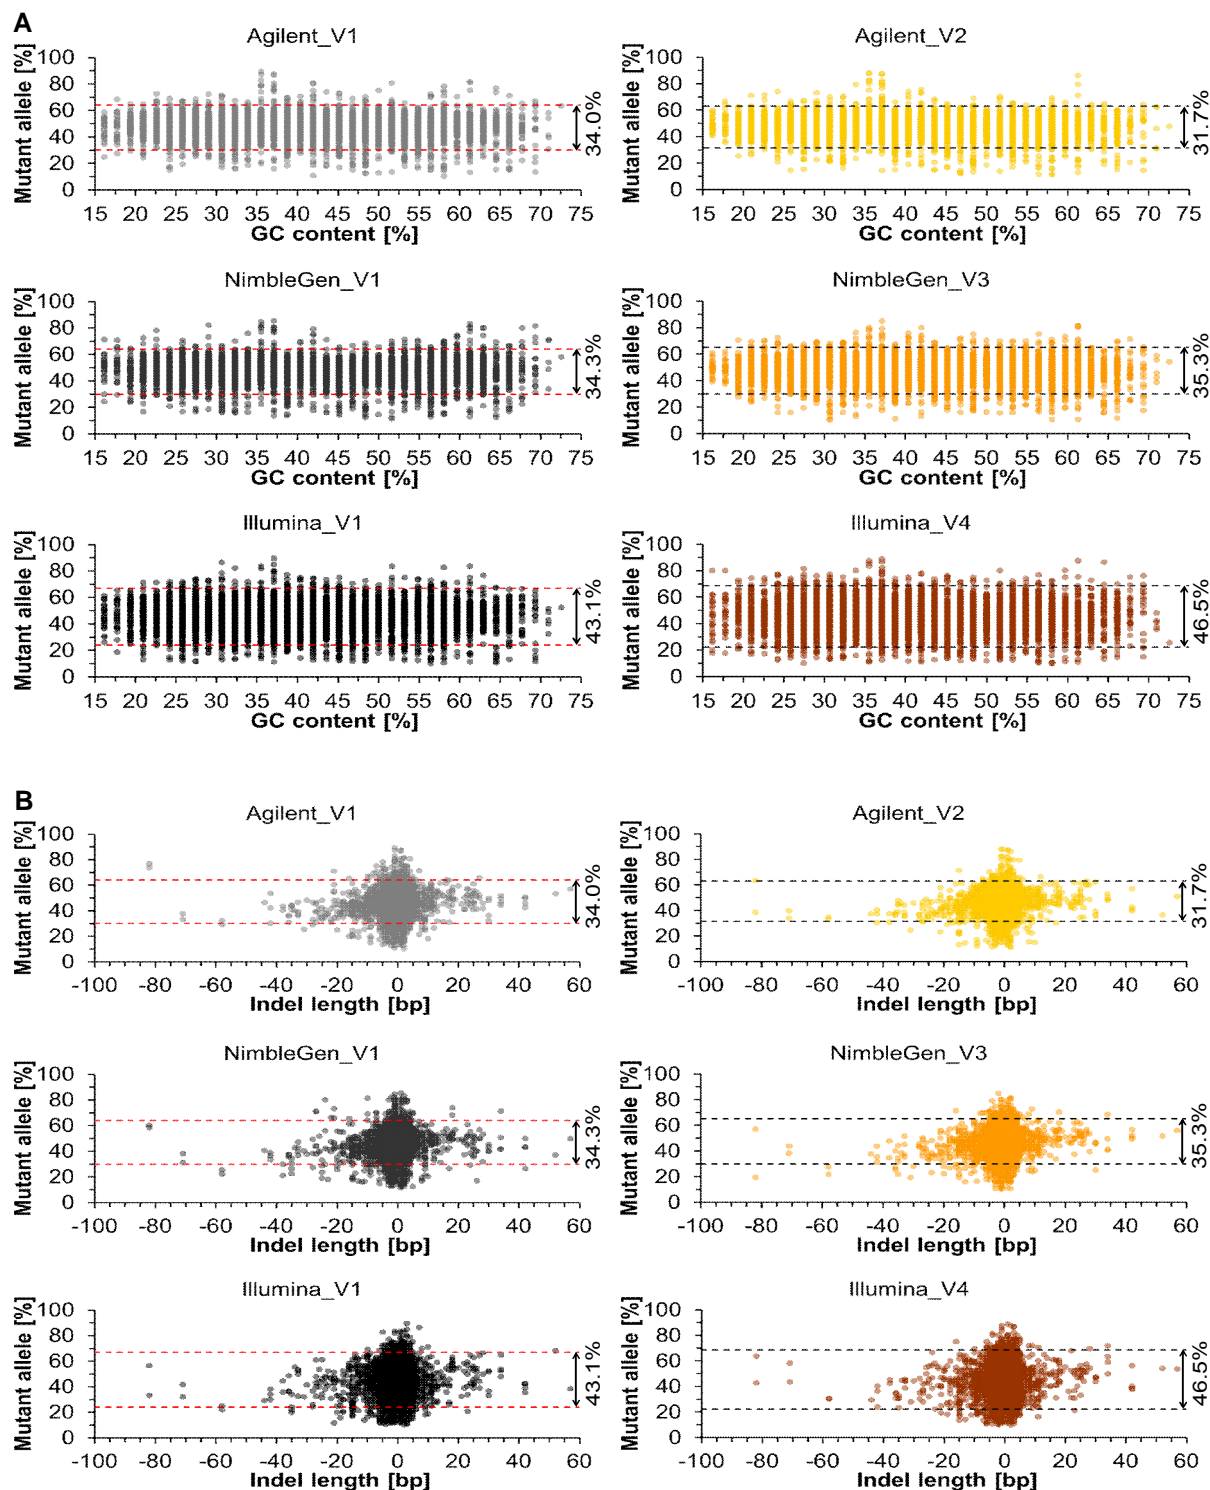

**Figure S20.** Percentages of non-reference (mutant) alleles for heterozygous indels called in our gVCF files generated by the same in-house bioinformatics pipeline for all six platform-vendor combinations. Fraction of biallelic non-reference alleles for shared heterozygous variants within the platforms' designed target region and 50-bp flanking sequences achieving  $\geq 20$  reads and  $> 30$  quality scores by all six platform-vendor combinations are displayed. **(A)** Diagrammed according to the GC content of 30-bp flanking sequences. **(B)** Diagrammed according to their length, thereby negative and positive values indicate deletions and insertions, respectively. Shown are values of all six DNA samples. Variant positions with more than one different non-reference allele (non-biallelic) as well as variant calls with alternative allele percentages outside 10-90% were excluded. Dashed lines indicate an interval within which 95% of the percentage values of non-reference alleles lie (calculated according to the Student's  $t$  distribution as the mean of  $n$  percentage values  $\pm$  critical  $t$  value ( $t_{\text{crit},n-1}$ )  $\times$   $SD$  using  $n = 5'645$ ,  $t_{\text{crit}} = 1.960$ ).

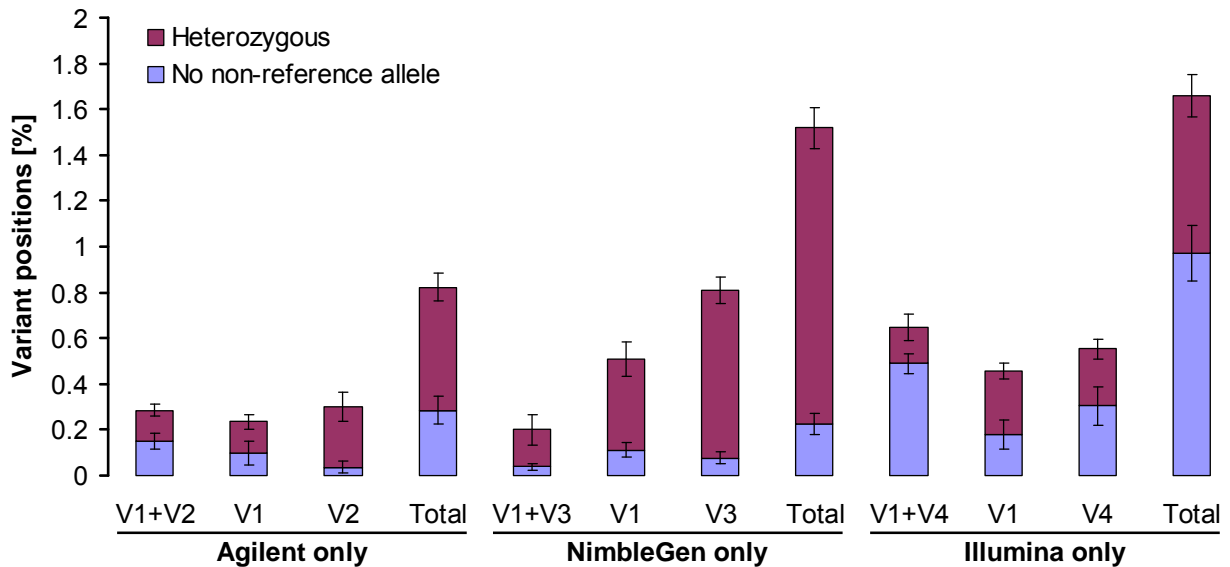

**Figure S21.** Differences in variant calling among platforms (Agilent, NimbleGen, Illumina) and vendors (V1-V4) in our gVCF files generated by the same in-house bioinformatics pipeline. Displayed are the relative proportions of heterozygous variant positions either called (heterozygous) or missed (no non-reference allele) by only one of the three platforms (i.e. called as heterozygous by only one or by all but one platform). Genomic positions within the platforms' designed target regions and 50-bp flanking sequences which achieved  $\geq 20$  reads and  $>30$  quality scores for all six platform-vendor combinations were considered for this analysis (cf. Supplementary Table S3), thereby excluding variant positions with more than one different alternative allele (non-biallelic) or heterozygous calls with allele fractions outside the range of 10-90%. For values see Supplementary Table S28. Error bars indicate 95% confidence intervals.

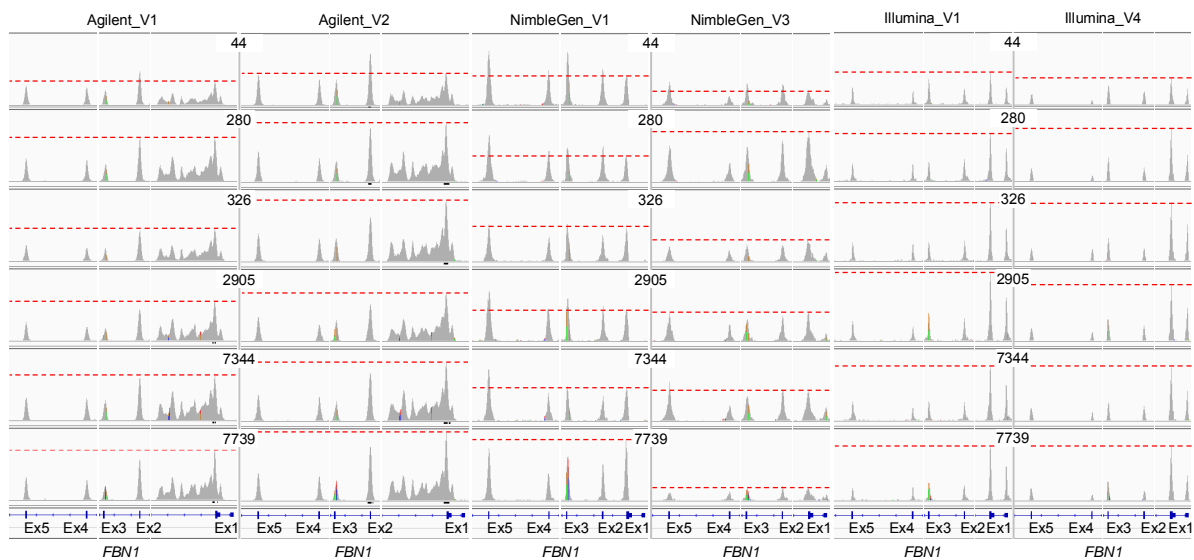

**Figure S22.** Coverage tracks displaying read depth for exons 1-5 of the *FBN1* gene. Note reduced read depth for deleted exon 1 in sample 44. Red dashed line indicates level of highest read depth of exon 1. Intronic regions between exons 1 and 2 as well as exons 3 and 4 are not shown. Coverage tracks are visualized by the Integrative Genomics Viewer (IGV) and display ranges are set to 0-500 reads for Agilent, 0-200 for NimbleGen, and 0-250 for Illumina.

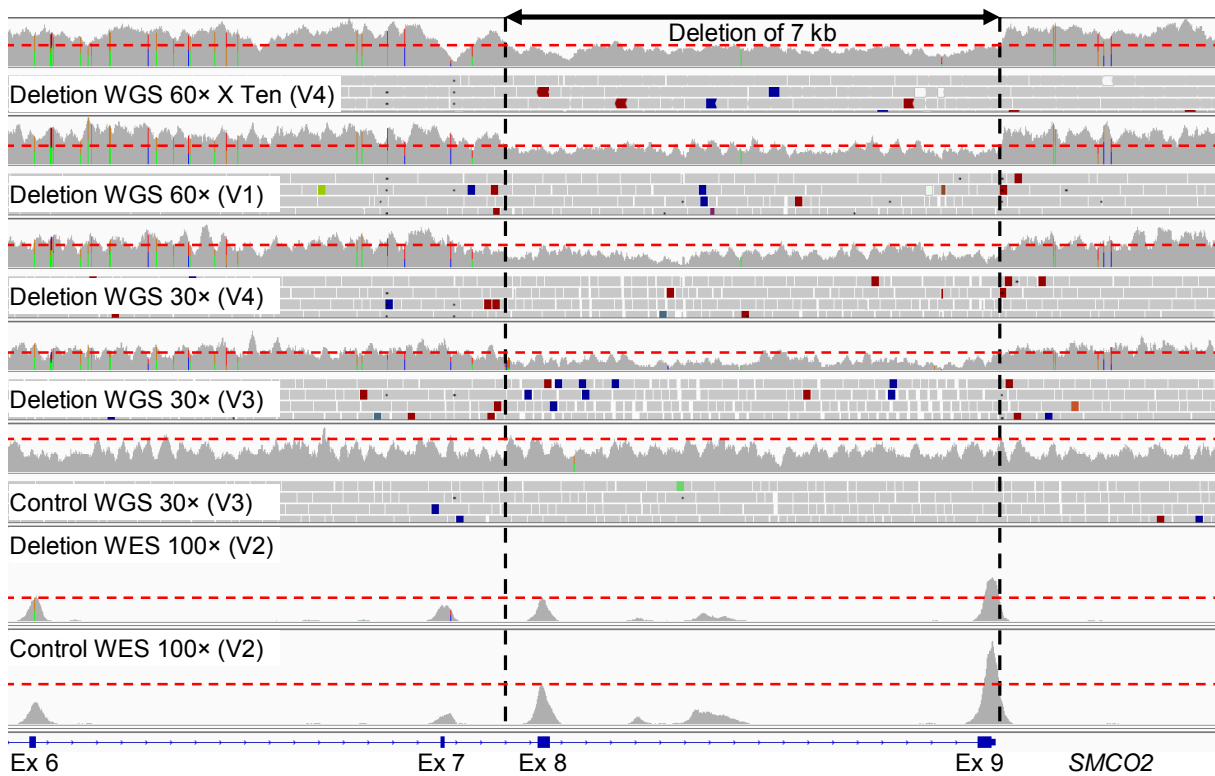

**Figure S23.** Deletion identification using WGS and WES. The genomic region of a deletion (sample 7739) detected by array CGH (4.2M NimbleGen aCGH, data not shown) is displayed by the Integrative Genomics Viewer (IGV) for both WGS and WES data. WGS was performed by V4 (HiSeq X Ten) and V1 at 60× as well as by V3 and V4 at 30×, whereas WES was carried out by V2 using Agilent SureSelect v5+UTR at 100×. For WES data, coverage track is shown only. Red dashed lines indicate level of highest read depth of exon 8. Display range of coverage tracks are set to 0-100 (V4 HiSeq X Ten), 0-60 (V1), 0-50 (V4), and 0-40 (V3) reads for WGS and 0-350 for WES.

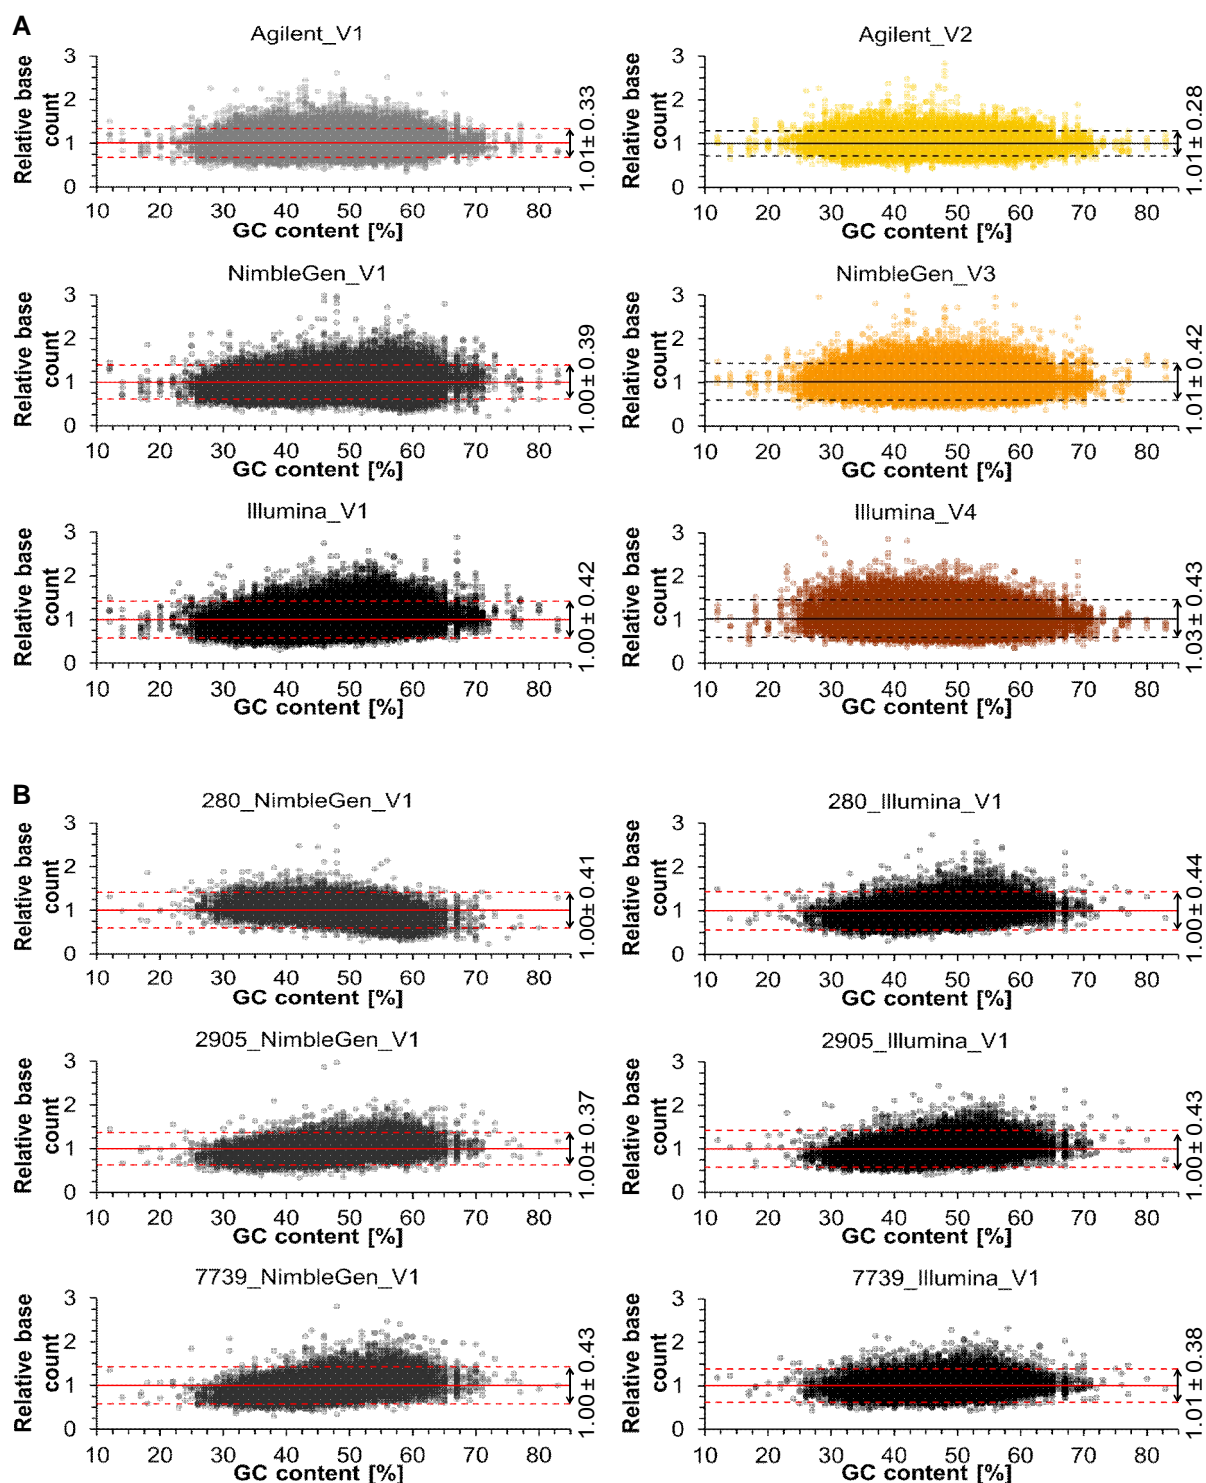

**Figure S24.** Relative WES base counts of 21'769 RefSeq exons completely (100%) covered at 20 $\times$  in all 36 platform-vendor-sample combinations (plotted relative to the corresponding base counts of sample 326 and against the GC content of the respective exon). (A) Superposition of all five samples (44, 280, 2905, 7344, and 7739) per platform-vendor combination. (B) Examples for individual samples (280, 2905, and 7739) of NimbleGen and Illumina both performed by vendor V1 (V1). Note that the distribution of relative base counts for 280\_NimbleGen\_V1 and 7739\_Illumina\_V1 differ from the patterns observed in the other two exemplified samples for the same platform-vendor combination. Solid line indicates mean and dashed lines indicate an interval within which 95% of the relative base counts lie (calculated according to the Student's  $t$  distribution as the mean of  $n$  values  $\pm$  critical  $t$  value ( $t_{crit,n-1}$ )  $\times$   $SD$  using  $n = 108'845$  and 21'769 in (A) and (B), respectively,  $t_{crit} = 1.960$ ). Values per sample and the number of dots with relative base counts  $>3$  not shown in this figure are given in Supplementary Table S29.

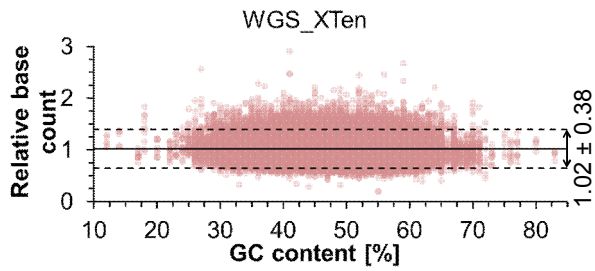

**Figure S25.** Superposition of the relative WGS base counts of 21'769 RefSeq exons (Supplementary Figure S24) of sample 7739 and four additional DNA samples plotted against the GC content of the respective exon. WGS was performed by V4 at 60× on a HiSeq X Ten system. Solid line indicates mean and dashed lines indicate an interval within which 95% of the relative base counts lie (calculated according to the Student's  $t$  distribution as the mean of  $n$  values  $\pm$  critical  $t$  value ( $t_{\text{crit},n-1}$ )  $\times$   $SD$  using  $n = 108'845$ ,  $t_{\text{crit}} = 1.960$ ). Nine dots have relative base counts  $>3$  and are therefore not shown in this figure.

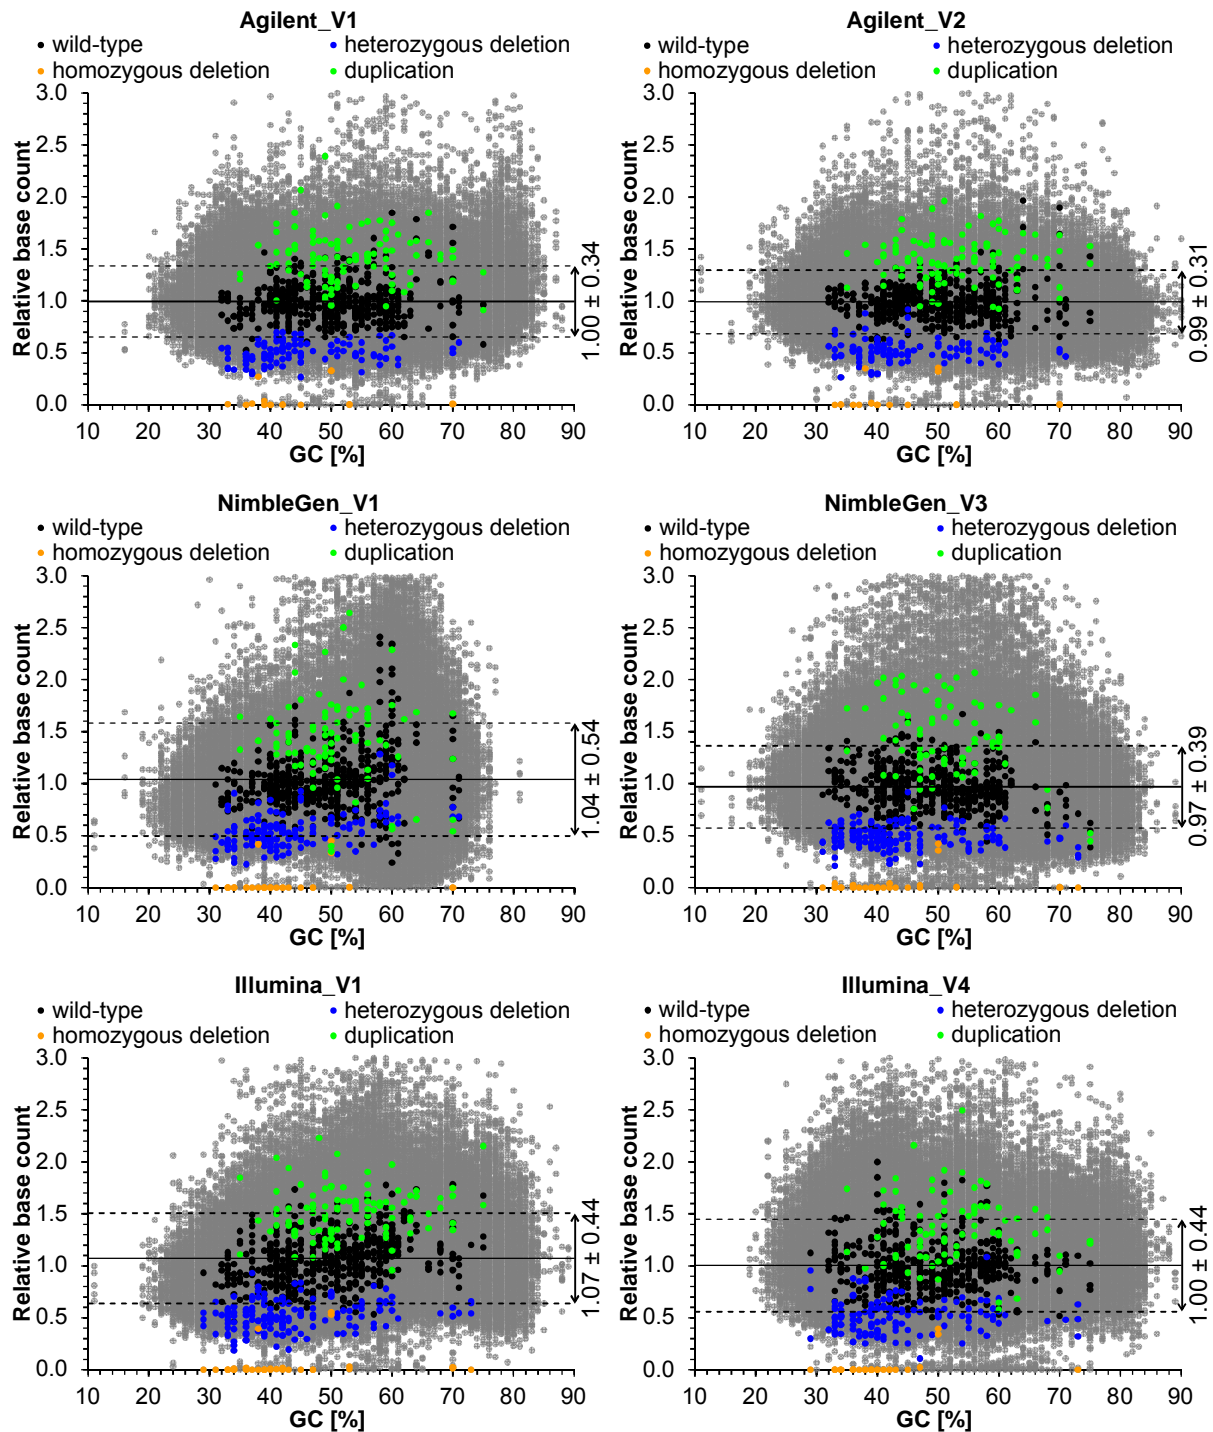

**Figure S26.** Relative WES base counts of 182 RefSeq exons with copy numbers known from array CGH (black/coloured dots according to the genotype given in Supplementary Table S21). For all six platform-vendor combinations, base counts are normalised by means of 21'769 RefSeq exons (Supplementary Figure S24) and plotted relative to the corresponding base counts of sample 326 and against the GC content of the respective exon. Relative WES base counts of ~160'000 RefSeq exons not used for normalisation with at least one base covered at 20× and a total base count of ≥1'000 in sample 326 are included and indicated (grey dots). Solid line indicates mean of the relative base counts of exons with two copies (wild-type, black dots) and dashed lines indicate an interval within which 95% of the relative base counts of these exons lie (calculated according to the Student's  $t$  distribution as the mean of  $n$  values  $\pm$  critical  $t$  value ( $t_{crit,n-1}$ )  $\times$   $SD$  using  $n = 541, 549, 533, 534, 566,$  and  $520$  for Agilent\_V1, Agilent\_V2, NimbleGen\_V1, NimbleGen\_V3, Illumina\_V1, and Illumina\_V4, respectively and  $t_{crit} = 1.960$ ). Values per sample and the number of dots with relative base counts  $>3$  not shown in this figure are given in Supplementary Table S30.

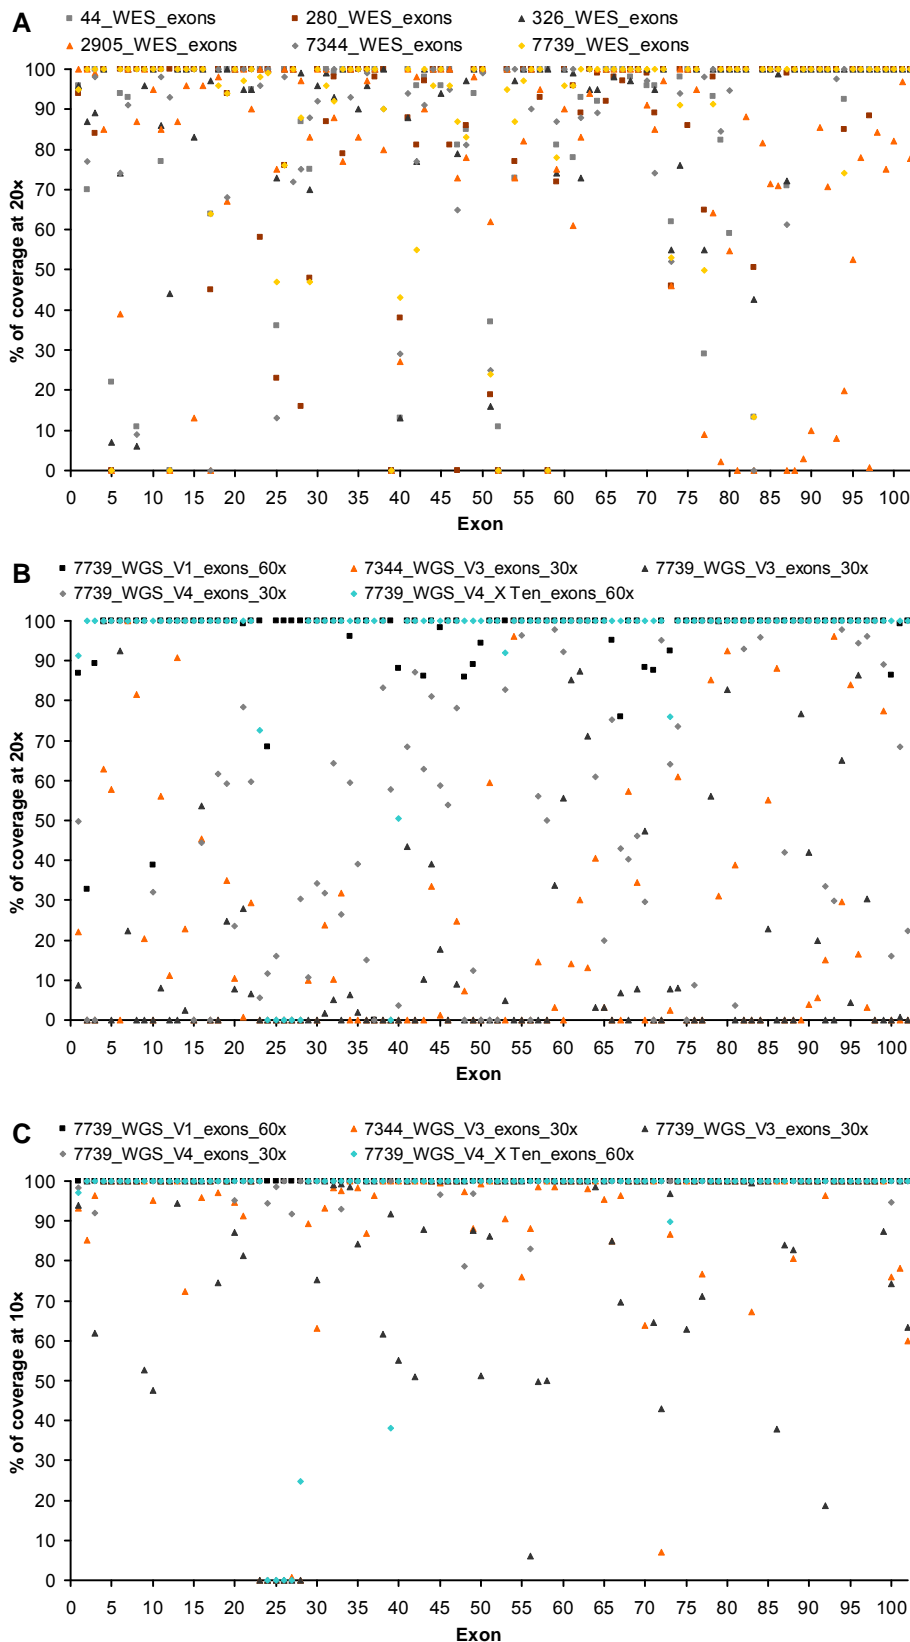

**Figure S27.** Coverage of selected RefSeq exons of 42 genes affected in monogenic disorders. **(A)** Percentage of coverage at 20× for WES data of the six DNA samples sequenced at 100× by V2 using Agilent. **(B, C)** Percentage of coverage at 20× **(B)** and at 10× **(C)** for WGS data of two DNA samples performed by V1 and V4 (HiSeq X Ten) at 60× as well as by V3 and V4 at 30×. Displayed RefSeq exons were covered <100% in at least one WES data set (102 out of 1'113 exons).

**Table S1.** Panel of eight selected genes and number of variants detected by Sanger sequencing in these genes in at least one of the six DNA samples used in this study. The numbers of heterozygous SNVs and indels (SNVs/indels) are summarized for each gene (all) as well as given for our region of interest (ROI, coding exons with -50-bp and +20-bp flanking intronic sequences) and UTR separately.

| <b>Genes (NM number)</b>    | <b>All</b>   | <b>Number of SNVs/indels</b> |            |
|-----------------------------|--------------|------------------------------|------------|
|                             |              | <b>ROI</b>                   | <b>UTR</b> |
| <i>COL3A1</i> (NM_000090)   | 28/1         | 11/0                         | 0/0        |
| <i>FBN1</i> (NM_000138)     | 35/8         | 13/4                         | 2/0        |
| <i>FLCN</i> (NM_144997)     | 0/0*         | 0/0*                         | 0/0        |
| <i>SLC2A10</i> (NM_030777)  | 1/0          | 1/0                          | 0/0        |
| <i>SMAD3</i> (NM_005902)    | 5/0          | 1/0                          | 1/0        |
| <i>TGFB2</i> (NM_001135599) | 1/0          | 0/0                          | 1/0        |
| <i>TGFBR1</i> (NM_004612)   | 5/2          | 1/1                          | 1/0        |
| <i>TGFBR2</i> (NM_003242)   | 3/0          | 3/0                          | 0/0        |
| <b>Total</b>                | <b>78/11</b> | <b>30/5</b>                  | <b>5/0</b> |

\*Only two homozygous SNVs, which were excluded from analysis.



**Table S2.** Details on the design of the three exome enrichment platforms used in this study.

| Platform                                                                                        | Agilent<br>SureSelect Human All Exon kit v5+UTR                     |                        |                      | NimbleGen<br>SeqCap EZ Exome v3+UTR                               |                      | Illumina<br>Nextera Rapid Capture<br>Expanded Exome |                      |
|-------------------------------------------------------------------------------------------------|---------------------------------------------------------------------|------------------------|----------------------|-------------------------------------------------------------------|----------------------|-----------------------------------------------------|----------------------|
| Bait length (hybridisation temperature)                                                         | 90/120 bp RNA (65°C)                                                |                        |                      | 55-105 bp DNA (47°C)                                              |                      | 95 bp DNA (58°C)                                    |                      |
| Number of baits                                                                                 | ~881'870                                                            |                        |                      | 2'100'000                                                         |                      | 340'427                                             |                      |
| Bait density                                                                                    | Adjacent, partially overlapping baits across designed target region |                        |                      | High-density overlapping baits; every base covered multiple times |                      | Gaps between the baits                              |                      |
| Region                                                                                          | Designed target region                                              | Hybridisation probes** | Padded***            | Designed target region                                            | Hybridisation probes | Designed target region                              | Hybridisation probes |
| Total region (coding + UTR)                                                                     | 75 Mb (50 + 25 Mb)                                                  | NA                     | NA                   | 96 Mb (64 + 32 Mb)                                                | NA                   | 62 Mb (42 + 20 Mb)                                  | NA                   |
| <b><i>Calculated total region</i></b>                                                           | <b><i>75 Mb</i></b>                                                 | <b><i>73 Mb</i></b>    | <b><i>117 Mb</i></b> | <b><i>96 Mb</i></b>                                               | <b><i>99 Mb</i></b>  | <b><i>62 Mb</i></b>                                 | <b><i>32 Mb</i></b>  |
| Number of genes                                                                                 | 21'522                                                              | NA                     | NA                   | >20'000                                                           | NA                   | 20'794                                              | NA                   |
| Number of exons                                                                                 | 359'555                                                             | NA                     | NA                   | NA                                                                | NA                   | 201'121                                             | NA                   |
| Coverage of RefSeq coding exons                                                                 | 93.7%*                                                              | NA                     | NA                   | 98.4%                                                             | NA                   | 95.3%                                               | NA                   |
| <b><i>Calculated coverage of RefSeq coding exons</i></b>                                        | <b><i>90.1%</i></b>                                                 | <b><i>89.6%</i></b>    | <b><i>98.0%</i></b>  | <b><i>98.3%</i></b>                                               | <b><i>96.5%</i></b>  | <b><i>94.9%</i></b>                                 | <b><i>67.0%</i></b>  |
| <b><i>Calculated proportion of RefSeq coding exons 100% covered</i></b>                         | <b><i>54.2%</i></b>                                                 | <b><i>52.8%</i></b>    | <b><i>97.5%</i></b>  | <b><i>98.3%</i></b>                                               | <b><i>70.1%</i></b>  | <b><i>94.0%</i></b>                                 | <b><i>24.0%</i></b>  |
| <b><i>Calculated proportion of RefSeq coding exons 0% covered</i></b>                           | <b><i>2.4%</i></b>                                                  | <b><i>2.6%</i></b>     | <b><i>1.8%</i></b>   | <b><i>1.6%</i></b>                                                | <b><i>1.7%</i></b>   | <b><i>4.9%</i></b>                                  | <b><i>7.2%</i></b>   |
| <b><i>Calculated coverage of 50-bp intronic sequences upstream of RefSeq coding exons</i></b>   | <b><i>64.2%</i></b>                                                 | <b><i>63.7%</i></b>    | <b><i>97.1%</i></b>  | <b><i>77.5%</i></b>                                               | <b><i>86.6%</i></b>  | <b><i>8.7%</i></b>                                  | <b><i>12.3%</i></b>  |
| <b><i>Calculated coverage of 20-bp intronic sequences downstream of RefSeq coding exons</i></b> | <b><i>70.3%</i></b>                                                 | <b><i>69.7%</i></b>    | <b><i>97.6%</i></b>  | <b><i>93.2%</i></b>                                               | <b><i>95.2%</i></b>  | <b><i>10.6%</i></b>                                 | <b><i>18.4%</i></b>  |
| Coverage of RefSeq 5'UTR and 3'UTR                                                              | 71.3%*                                                              | NA                     | NA                   | NA                                                                | NA                   | >88%                                                | NA                   |
| Coverage of Gencode/Encode coding exons                                                         | 97.9%*                                                              | NA                     | NA                   | 96.7%                                                             | NA                   | 91.6%                                               | NA                   |
| Coverage of Ensembl coding exons                                                                | 94.1%*                                                              | NA                     | NA                   | 99.0%                                                             | NA                   | 90.6%                                               | NA                   |
| Coverage of CCDS exons                                                                          | 98.8%*                                                              | NA                     | NA                   | 99.8%                                                             | NA                   | 96.0%                                               | NA                   |
| Coverage of miRBase                                                                             | 96.0%*                                                              | NA                     | NA                   | 98.7%                                                             | NA                   | >77.0%                                              | NA                   |
| Input gDNA                                                                                      | 200 ng (low input), 3 µg (standard input)                           |                        |                      | 1 µg                                                              |                      | 50 ng                                               |                      |

Information based on documents provided by companies or on correspondence with a company representative as marked by asterisk (\*), except for those in bold italic which were calculated from design files downloaded from companies' websites using the SeqMonk program (<http://www.bioinformatics.babraham.ac.uk/projects/seqmonk/>) and a recent release of the RefSeq database (version December 2013). Note that according to Agilent's definition the designed target region is completely covered by probes, whereas NimbleGen and Illumina define it as the region intended/designed to be enriched, which may explain lower coverage values in Agilent's designed target region (cf. also Supplementary Figure S4). \*\*Some of Agilent's designed target regions are missing in the hybridisation probe file; \*\*\*Agilent provides an additional file with a so called padded region including designed target region as well as 100-bp flanking sequences for which sufficient coverage can be expected according to Agilent; CCDS, Consensus Coding Sequences; NA, not available; files for designed target region: Agilent: S04380219\_Regions.bed, NimbleGen: track "Target Regions" in 120430\_HG19\_ExomeV3\_UTR\_EZ\_HX1.bed, Illumina: nexterarapidcapture\_expandedexome\_targetedregions.bed; files for genomic positions of hybridisation probes: Agilent: S04380219\_Probes.txt, NimbleGen: track "Tiled Regions" in 120430\_HG19\_ExomeV3\_UTR\_EZ\_HX1.bed, Illumina: nexterarapidcapture\_expandedexome\_probes.txt; file for Agilent's padded region: S04380219\_Padded.bed.

**Table S3.** Data analysis workflow and software used in this study.

|                                                                 | <b>Vendor 1 (V1)*<br/>(Agilent, NimbleGen, Illumina)</b>                                                                                                                                                                                                                                                                                 | <b>Vendor 2 (V2)*<br/>(Agilent)</b>                                                                                                                                                                                                                                             | <b>Vendor 3 (V3)*<br/>(NimbleGen)</b>                                               | <b>Vendor 4 (V4)*<br/>(Illumina)</b>                                                                            | <b>In-house generated<br/>gVCF files</b>                                                                                                                        |
|-----------------------------------------------------------------|------------------------------------------------------------------------------------------------------------------------------------------------------------------------------------------------------------------------------------------------------------------------------------------------------------------------------------------|---------------------------------------------------------------------------------------------------------------------------------------------------------------------------------------------------------------------------------------------------------------------------------|-------------------------------------------------------------------------------------|-----------------------------------------------------------------------------------------------------------------|-----------------------------------------------------------------------------------------------------------------------------------------------------------------|
| Pre-processing                                                  | Demultiplexing with CASAVA v1.8.2; adapter clipping; quality trimming (removal of reads containing more than one N; removal of bases or complete reads with sequencing errors; trimming of reads at 3'-end to get a minimum mean Phred quality score of 10 over a window of ten bases; reads with final length <20 bases were discarded) | Read files (FASTQ) generated from the sequencing platform via the manufacturer's proprietary software                                                                                                                                                                           | CASAVA v1.8.2                                                                       | RTA v.1.1.2.4; CASAVA v1.8.2                                                                                    | ---                                                                                                                                                             |
| Alignment                                                       | BWA v.0.7.5a; Picard v1.92 MarkDuplicates; GATK v.1.6-11, GATK resource bundle v2.5 for the human genome release b37: realignment around known and identified indels and recalibration of qualities using known variants to correct for biases                                                                                           | BWA v.0.6.2 (hg19/37); Picard v.1.98 MarkDuplicates; GATK v.1.6: local realignment of the mapped reads around potential indel sites and base quality (Phred scale) scores recalibration (GATK's covariance recalibration); SAMtools v.0.1.18: additional BAM file manipulations | ELANDv2e                                                                            | BWA, v.0.5.9; SAMtools: extract mappable reads, extract on-target reads****                                     | BWA, v.0.7.10-r789; Picard v1.80 MarkDuplicates; GATK v3.1.1: indel realignment and base quality scores recalibration; SAMtools v0.1.19: BAM file manipulations |
| Provided/generated BAM files                                    | Unfiltered BAM files with marked duplicates**                                                                                                                                                                                                                                                                                            | Unfiltered BAM files with marked duplicates**                                                                                                                                                                                                                                   | Mapped unique reads without duplicates                                              | Mapped unique on-target reads**** without duplicates                                                            | Unfiltered BAM files with marked duplicates**                                                                                                                   |
| Variant calling                                                 | GATK v.1.6-11, GATK resource bundle v2.5 for the human genome release b37: variant discovery and genotyping using the GATK Unified Genotyper and variant quality score recalibration using known true and false positive variant calls from the 1000 GP                                                                                  | GATK v.1.6: SNP and indel variants called using the GATK Unified Genotyper, dbSNP release 135 to improve quality of calls; SNP novelty determined against dbSNP release 132                                                                                                     | CASAVA v1.8.2; annotation using dbSNP, 1000 GP percentage, ESP percentage, and HGMD | SAMtools: extract SNVs and indels, filter SNVs and indels, and annotation; variant databases: dbSNP and 1000 GP | GATK v. 3.1.1: Haplotype Caller                                                                                                                                 |
| Region for variant calling                                      | Platforms' designed target region                                                                                                                                                                                                                                                                                                        | Platforms' designed target region with 100-bp flanking sequences                                                                                                                                                                                                                | No restriction                                                                      | Platforms' designed target region with 100-bp flanking sequences                                                | Platforms' designed target region with 50-bp flanking sequences                                                                                                 |
| Variants/positions in unfiltered VCF files                      | Quality >30, read depth >1                                                                                                                                                                                                                                                                                                               | Quality >30, read depth >1                                                                                                                                                                                                                                                      | Quality ≥20, read depth >2                                                          | Quality >3, read depth >1                                                                                       | Quality >30, read depth ≥20                                                                                                                                     |
| Variant filter and recalibration settings in filtered VCF files | SNVs: ABHet >1.0, DP <10, QD <5.0, QUAL <30, and FS >60<br>Indels: DP <10, HRun >5, ReadPosRankSum <-20.0, and FS >200.0<br>Recalibration: TruthSensitivityTranches 99.00 to 99.90, 99.90 to 100+ as well as 99.90 to 100***                                                                                                             | SNVs: MQRankSum <-12.5, ReadPosRankSum <-8.0, QD <5.0, MQ <40.0, FS >60.0, HaplotypeScore >13<br>Indel: QD <2.0, FS >200.0, ReadPosRankSum <-20.0****<br>No recalibration                                                                                                       | No filtered and recalibrated VCF file available                                     | No filtered and recalibrated VCF file available                                                                 | No filtered and recalibrated VCF file available                                                                                                                 |

\*Information on bioinformatics pipelines of vendors V1-V4 are according to supplied documentation and information stored in provided filtered VCF files. Note that for the different analysis steps, quality and quantity of information on both data analysis pipeline and platform metrics differed among vendors. Most information on data analysis workflow was provided by V1 and V2, whereas information from V3 was only obtained upon request and the report of V4 was rather poor.

\*\*Marked duplicates were removed from the provided/generated BAM files using Picard v1.108/1.118 MarkDuplicates.

\*\*\*Nomenclature according to VCF v4.1 format.

\*\*\*\*V4 defined on-target reads as reads within platforms' designed target region and 100-bp flanking sequences, number of aligned reads is given as total number of mapped unique reads without restriction on on-target reads (cf. Figure 1A, Supplementary Figure S13, and Supplementary Tables S5 and S24).

BWA, Burrows-Wheeler Aligner; CASAVA, Consensus Assessment of Sequence and Variation; GATK, Genome Analysis Tool Kit; RTA, real time analysis; 1000 GP, 1000 genome project; ESP, exome sequencing project; HGMD, human genome mutation database; ---, not performed; NA, not available.

**Table S4.** Enrichment efficiency for the designed target regions of the three enrichment platforms performed by the same vendor (V1).

| <b>Agilent_V1_designed target region</b>             | <b>44</b>   | <b>280</b>  | <b>326</b>  | <b>2905</b> | <b>7344</b> | <b>7739</b> | <b>Mean</b>        |
|------------------------------------------------------|-------------|-------------|-------------|-------------|-------------|-------------|--------------------|
| Total number of designed targets                     | 286'754     | 286'754     | 286'754     | 286'754     | 286'754     | 286'754     | <b>286'754</b>     |
| Total number of aligned reads                        | 110'584'430 | 119'682'978 | 87'403'593  | 96'387'713  | 133'734'129 | 118'295'260 | <b>111'014'684</b> |
| Approximate mean number of reads per designed target | 270         | 289         | 211         | 233         | 322         | 290         | <b>269</b>         |
| Mean read depth                                      | 101         | 107         | 79          | 87          | 120         | 109         | <b>100</b>         |
| Mean % coverage at 1×                                | 99.69       | 99.67       | 99.55       | 99.77       | 99.71       | 99.65       | <b>99.67</b>       |
| Mean % coverage at 20×                               | 95.63       | 96.36       | 93.43       | 94.28       | 96.78       | 96.00       | <b>95.41</b>       |
| Approximate number of reads on target*               | 77'352'358  | 82'771'475  | 60'593'256  | 66'819'600  | 92'345'161  | 83'213'677  | <b>77'182'588</b>  |
| Approximate % of reads on target*                    | 69.95       | 69.16       | 69.33       | 69.32       | 69.05       | 70.34       | <b>69.52</b>       |
| Approximate number of reads on target* ±500 bp       | 94'568'991  | 102'773'417 | 75'321'697  | 82'878'078  | 114'881'869 | 101'429'148 | <b>95'308'866</b>  |
| Approximate % of reads off target**                  | 14.48       | 14.13       | 13.82       | 14.02       | 14.10       | 14.26       | <b>14.15</b>       |
| <b>NimbleGen_V1_designed target region</b>           | <b>44</b>   | <b>280</b>  | <b>326</b>  | <b>2905</b> | <b>7344</b> | <b>7739</b> | <b>Mean</b>        |
| Total number of designed targets                     | 237'172     | 237'172     | 237'172     | 237'172     | 237'172     | 237'172     | <b>237'172</b>     |
| Total number of aligned reads                        | 186'538'676 | 129'934'094 | 122'855'749 | 151'654'787 | 143'047'403 | 159'150'546 | <b>148'863'543</b> |
| Approximate mean number of reads per designed target | 474         | 326         | 322         | 377         | 352         | 425         | <b>379</b>         |
| Mean read depth                                      | 106         | 71          | 71          | 84          | 78          | 96          | <b>84</b>          |
| Mean % coverage at 1×                                | 91.30       | 86.62       | 89.31       | 90.29       | 90.93       | 90.98       | <b>89.91</b>       |
| Mean % coverage at 20×                               | 81.73       | 73.46       | 77.14       | 79.15       | 79.72       | 80.53       | <b>78.62</b>       |
| Approximate number of reads on target*               | 112'460'374 | 77'223'935  | 76'439'364  | 89'323'164  | 83'535'838  | 100'795'033 | <b>89'962'951</b>  |
| Approximate % of reads on target*                    | 60.29       | 59.43       | 62.22       | 58.90       | 58.40       | 63.33       | <b>60.43</b>       |
| Approximate number of reads on target* ±500 bp       | 141'280'259 | 98'855'834  | 97'276'602  | 113'270'989 | 105'729'484 | 125'022'431 | <b>113'572'600</b> |
| Approximate % of reads off target**                  | 24.26       | 23.92       | 20.82       | 25.31       | 26.09       | 21.44       | <b>23.71</b>       |
| <b>Illumina_V1_designed target region</b>            | <b>44</b>   | <b>280</b>  | <b>326</b>  | <b>2905</b> | <b>7344</b> | <b>7739</b> | <b>Mean</b>        |
| Total number of designed targets                     | 201'071     | 201'071     | 201'071     | 201'071     | 201'071     | 201'071     | <b>201'071</b>     |
| Total number of aligned reads                        | 88'290'788  | 95'545'396  | 79'962'090  | 109'038'759 | 101'342'654 | 72'695'510  | <b>91'145'866</b>  |
| Approximate mean number of reads per designed target | 197         | 218         | 180         | 242         | 223         | 165         | <b>204</b>         |
| Mean read depth                                      | 80          | 85          | 74          | 96          | 87          | 67          | <b>81</b>          |
| Mean % coverage at 1×                                | 99.36       | 99.32       | 99.19       | 99.57       | 99.47       | 99.18       | <b>99.35</b>       |
| Mean % coverage at 20×                               | 89.96       | 91.34       | 88.57       | 92.72       | 91.87       | 86.99       | <b>90.24</b>       |
| Approximate number of reads on target*               | 39'675'247  | 43'734'230  | 36'185'233  | 48'569'940  | 44'852'503  | 33'136'433  | <b>41'025'598</b>  |
| Approximate % of reads on target*                    | 44.94       | 45.77       | 45.25       | 44.54       | 44.26       | 45.58       | <b>45.01</b>       |
| Approximate number of reads on target* ±500 bp       | 52'331'403  | 58'686'892  | 46'659'126  | 64'833'841  | 60'567'552  | 43'352'624  | <b>54'405'240</b>  |
| Approximate % of reads off target**                  | 40.73       | 38.58       | 41.65       | 40.54       | 40.23       | 40.36       | <b>40.31</b>       |

\*Only reads within designed target region are considered as on target; \*\*Off-target enrichment was assessed as a fraction of total aligned reads without duplicates which mapped more than 500 bp outside the designed target regions.

**Table S5.** Enrichment efficiency for the designed target regions of the three enrichment platforms performed by different vendors (V2-V4).

| <b>Agilent_V2_designed target region</b>             | <b>44</b>   | <b>280</b>  | <b>326</b>  | <b>2905</b> | <b>7344</b> | <b>7739</b> | <b>Mean</b>        |
|------------------------------------------------------|-------------|-------------|-------------|-------------|-------------|-------------|--------------------|
| Total number of designed targets                     | 286'754     | 286'754     | 286'754     | 286'754     | 286'754     | 286'754     | <b>286'754</b>     |
| Total number of aligned reads                        | 172'118'729 | 160'900'330 | 157'585'695 | 129'503'393 | 156'320'331 | 156'695'689 | <b>155'520'695</b> |
| Approximate mean number of reads per designed target | 393         | 367         | 356         | 291         | 350         | 359         | <b>353</b>         |
| Mean read depth                                      | 148         | 137         | 133         | 108         | 131         | 134         | <b>132</b>         |
| Mean % coverage at 1×                                | 99.73       | 99.72       | 99.77       | 99.86       | 99.72       | 99.73       | <b>99.75</b>       |
| Mean % coverage at 20×                               | 97.97       | 97.79       | 97.81       | 96.78       | 97.61       | 97.67       | <b>97.60</b>       |
| Approximate number of reads on target*               | 112'787'851 | 105'277'451 | 102'187'865 | 83'425'965  | 100'486'466 | 102'954'139 | <b>101'186'623</b> |
| Approximate % of reads on target*                    | 65.53       | 65.43       | 64.85       | 64.42       | 64.28       | 65.70       | <b>65.06</b>       |
| Approximate number of reads on target* ±500 bp       | 140'118'470 | 133'378'927 | 129'248'040 | 106'320'714 | 128'338'725 | 128'600'703 | <b>127'667'597</b> |
| Approximate % of reads off target**                  | 18.59       | 17.10       | 17.98       | 17.90       | 17.90       | 17.93       | <b>17.91</b>       |
| <b>NimbleGen_V3_designed target region</b>           | <b>44</b>   | <b>280</b>  | <b>326</b>  | <b>2905</b> | <b>7344</b> | <b>7739</b> | <b>Mean</b>        |
| Total number of designed targets                     | 237'172     | 237'172     | 237'172     | 237'172     | 237'172     | 237'172     | <b>237'172</b>     |
| Total number of aligned reads***                     | 72'899'287  | 158'324'581 | 61'382'269  | 90'817'153  | 121'277'235 | 41'985'030  | <b>91'114'259</b>  |
| Approximate mean number of reads per designed target | 203         | 446         | 172         | 250         | 334         | 115         | <b>253</b>         |
| Mean read depth                                      | 46          | 94          | 39          | 55          | 72          | 26          | <b>55</b>          |
| Mean % coverage at 1×                                | 98.56       | 98.70       | 98.48       | 98.74       | 98.70       | 98.36       | <b>98.59</b>       |
| Mean % coverage at 20×                               | 92.12       | 95.51       | 89.17       | 91.48       | 94.60       | 71.83       | <b>89.12</b>       |
| Approximate number of reads on target*               | 48'213'734  | 105'669'383 | 40'763'348  | 59'221'672  | 79'236'343  | 27'159'248  | <b>60'043'955</b>  |
| Approximate % of reads on target*                    | 66.14       | 66.74       | 66.41       | 65.21       | 65.33       | 64.69       | <b>65.90</b>       |
| Approximate number of reads on target* ±500 bp       | 64'166'634  | 139'984'744 | 54'364'051  | 79'815'713  | 106'988'793 | 37'100'565  | <b>80'403'417</b>  |
| Approximate % of reads off target**                  | 11.98       | 11.58       | 11.43       | 12.11       | 11.78       | 11.63       | <b>11.76</b>       |
| <b>Illumina_V4_designed target region</b>            | <b>44</b>   | <b>280</b>  | <b>326</b>  | <b>2905</b> | <b>7344</b> | <b>7739</b> | <b>Mean</b>        |
| Total number of designed targets                     | 201'071     | 201'071     | 201'071     | 201'071     | 201'071     | 201'071     | <b>201'071</b>     |
| Total number of aligned reads***                     | 53'245'236  | 45'562'196  | 56'364'527  | 57'138'610  | 55'996'771  | 47'498'550  | <b>52'634'315</b>  |
| Approximate mean number of reads per designed target | 137         | 114         | 140         | 143         | 139         | 121         | <b>132</b>         |
| Mean read depth                                      | 54          | 46          | 57          | 57          | 54          | 48          | <b>53</b>          |
| Mean % coverage at 1×                                | 98.49       | 98.32       | 98.50       | 98.63       | 98.58       | 98.41       | <b>98.49</b>       |
| Mean % coverage at 20×                               | 85.85       | 81.45       | 86.24       | 86.00       | 82.44       | 82.44       | <b>84.07</b>       |
| Approximate number of reads on target*               | 27'610'149  | 22'994'522  | 28'087'064  | 28'707'234  | 27'898'446  | 24'301'298  | <b>26'599'785</b>  |
| Approximate % of reads on target*                    | 51.85       | 50.47       | 49.83       | 50.24       | 49.82       | 51.16       | <b>50.54</b>       |
| Approximate number of reads on target* ±500 bp       | 33'196'467  | 27'625'088  | 33'570'343  | 34'504'989  | 33'608'122  | 29'249'735  | <b>31'959'124</b>  |
| Approximate % of reads off target**                  | 37.65       | 39.37       | 40.44       | 39.61       | 39.98       | 38.42       | <b>39.28</b>       |

\*Only reads within designed target region are considered as on target; \*\*Off-target enrichment was assessed as a fraction of total aligned reads without duplicates which mapped more than 500 bp outside the designed target regions; \*\*\*only unique reads (cf. Supplementary Table S3).

**Table S6.** Enrichment efficiency of the three enrichment platforms performed by the same vendor (V1) for RefSeq exons.

|                                           |            |            |            |             |             |             |             |
|-------------------------------------------|------------|------------|------------|-------------|-------------|-------------|-------------|
| <b>Agilent V1 RefSeq_all</b>              | <b>44</b>  | <b>280</b> | <b>326</b> | <b>2905</b> | <b>7344</b> | <b>7739</b> | <b>Mean</b> |
| Total number of exons                     | 232'619    | 232'619    | 232'619    | 232'619     | 232'619     | 232'619     | 232'619     |
| Approximate number of reads on exons      | 62'700'606 | 67'193'698 | 49'197'375 | 54'225'588  | 75'061'028  | 67'190'204  | 62'594'750  |
| Approximate mean number of reads per exon | 270        | 289        | 211        | 233         | 323         | 289         | 269         |
| Mean read depth                           | 90         | 95         | 70         | 77          | 106         | 96          | 89          |
| Mean % coverage at 1x                     | 91.18      | 91.35      | 90.47      | 90.96       | 91.49       | 91.19       | 91.11       |
| Mean % coverage at 20x                    | 83.57      | 84.27      | 81.67      | 82.43       | 84.74       | 83.79       | 83.41       |
| <b>NimbleGen V1 RefSeq_all</b>            | <b>44</b>  | <b>280</b> | <b>326</b> | <b>2905</b> | <b>7344</b> | <b>7739</b> | <b>Mean</b> |
| Total number of exons                     | 232'619    | 232'619    | 232'619    | 232'619     | 232'619     | 232'619     | 232'619     |
| Approximate number of reads on exons      | 88'680'868 | 60'566'348 | 60'014'994 | 70'443'258  | 65'994'615  | 79'544'377  | 70'874'077  |
| Approximate mean number of reads per exon | 381        | 260        | 258        | 303         | 284         | 342         | 305         |
| Mean read depth                           | 111        | 73         | 74         | 87          | 82          | 101         | 88          |
| Mean % coverage at 1x                     | 88.92      | 83.36      | 86.01      | 87.67       | 88.40       | 88.15       | 87.09       |
| Mean % coverage at 20x                    | 77.45      | 68.82      | 72.83      | 75.00       | 75.72       | 76.31       | 74.36       |
| <b>Illumina V1 RefSeq_all</b>             | <b>44</b>  | <b>280</b> | <b>326</b> | <b>2905</b> | <b>7344</b> | <b>7739</b> | <b>Mean</b> |
| Total number of exons                     | 232'619    | 232'619    | 232'619    | 232'619     | 232'619     | 232'619     | 232'619     |
| Approximate number of reads on exons      | 43'672'521 | 48'168'416 | 39'641'712 | 53'453'760  | 49'393'423  | 36'401'395  | 45'121'871  |
| Approximate mean number of reads per exon | 188        | 207        | 170        | 230         | 212         | 156         | 194         |
| Mean read depth                           | 73         | 78         | 68         | 88          | 80          | 61          | 75          |
| Mean % coverage at 1x                     | 94.40      | 94.43      | 93.85      | 95.34       | 95.11       | 93.62       | 94.46       |
| Mean % coverage at 20x                    | 81.61      | 82.94      | 80.23      | 84.31       | 83.48       | 78.81       | 81.90       |
| <b>Agilent V1 RefSeq coding region</b>    | <b>44</b>  | <b>280</b> | <b>326</b> | <b>2905</b> | <b>7344</b> | <b>7739</b> | <b>Mean</b> |
| Total number of exons                     | 202'044    | 202'044    | 202'044    | 202'044     | 202'044     | 202'044     | 202'044     |
| Approximate number of reads on exons      | 39'019'740 | 41'231'642 | 30'210'489 | 33'413'675  | 46'161'327  | 41'534'098  | 38'595'162  |
| Approximate mean number of reads per exon | 193        | 204        | 150        | 165         | 228         | 206         | 191         |
| Mean read depth                           | 106        | 113        | 82         | 91          | 126         | 114         | 105         |
| Mean % coverage at 1x                     | 98.88      | 98.89      | 98.74      | 98.93       | 98.93       | 98.86       | 98.87       |
| Mean % coverage at 15x                    | 96.34      | 96.70      | 95.22      | 95.73       | 96.94       | 96.41       | 96.22       |
| Mean % coverage at 20x                    | 94.89      | 95.52      | 92.97      | 93.72       | 95.96       | 95.13       | 94.70       |
| <b>NimbleGen V1 RefSeq coding region</b>  | <b>44</b>  | <b>280</b> | <b>326</b> | <b>2905</b> | <b>7344</b> | <b>7739</b> | <b>Mean</b> |
| Total number of exons                     | 202'044    | 202'044    | 202'044    | 202'044     | 202'044     | 202'044     | 202'044     |
| Approximate number of reads on exons      | 44'148'941 | 28'580'556 | 28'882'087 | 34'833'826  | 32'716'041  | 40'243'688  | 34'900'857  |
| Approximate mean number of reads per exon | 219        | 141        | 143        | 172         | 162         | 199         | 173         |
| Mean read depth                           | 118        | 77         | 78         | 92          | 87          | 108         | 93          |
| Mean % coverage at 1x                     | 91.66      | 86.20      | 89.39      | 90.39       | 91.22       | 91.35       | 90.04       |
| Mean % coverage at 15x                    | 83.76      | 74.96      | 79.37      | 81.45       | 82.41       | 82.77       | 80.79       |
| Mean % coverage at 20x                    | 82.23      | 73.03      | 77.42      | 79.64       | 80.55       | 81.11       | 79.00       |
| <b>Illumina V1 RefSeq coding region</b>   | <b>44</b>  | <b>280</b> | <b>326</b> | <b>2905</b> | <b>7344</b> | <b>7739</b> | <b>Mean</b> |
| Total number of exons                     | 202'044    | 202'044    | 202'044    | 202'044     | 202'044     | 202'044     | 202'044     |
| Approximate number of reads on exons      | 25'832'596 | 28'353'998 | 23'513'955 | 31'645'766  | 29'003'715  | 21'497'098  | 26'641'188  |
| Approximate mean number of reads per exon | 128        | 140        | 116        | 157         | 144         | 106         | 132         |
| Mean read depth                           | 77         | 83         | 72         | 93          | 84          | 64          | 79          |
| Mean % coverage at 1x                     | 97.64      | 97.64      | 97.38      | 98.10       | 97.94       | 97.30       | 97.67       |
| Mean % coverage at 15x                    | 90.05      | 91.13      | 88.85      | 92.05       | 91.57       | 88.05       | 90.28       |
| Mean % coverage at 20x                    | 86.62      | 88.18      | 85.31      | 89.47       | 88.61       | 83.75       | 86.99       |
| <b>Agilent V1 RefSeq 5'UTR</b>            | <b>44</b>  | <b>280</b> | <b>326</b> | <b>2905</b> | <b>7344</b> | <b>7739</b> | <b>Mean</b> |
| Total number of exons                     | 54'367     | 54'367     | 54'367     | 54'367      | 54'367      | 54'367      | 54'367      |
| Approximate number of reads on exons      | 6'377'126  | 6'675'046  | 4'884'380  | 5'431'411   | 7'389'371   | 6'520'103   | 6'212'906   |
| Approximate mean number of reads per exon | 117        | 123        | 90         | 100         | 136         | 120         | 114         |
| Mean read depth                           | 75         | 79         | 57         | 64          | 88          | 78          | 74          |
| Mean % coverage at 1x                     | 76.09      | 76.42      | 73.59      | 75.17       | 76.82       | 75.95       | 75.67       |
| Mean % coverage at 20x                    | 59.76      | 60.43      | 57.51      | 58.69       | 60.80       | 59.30       | 59.41       |
| <b>NimbleGen V1 RefSeq 5'UTR</b>          | <b>44</b>  | <b>280</b> | <b>326</b> | <b>2905</b> | <b>7344</b> | <b>7739</b> | <b>Mean</b> |
| Total number of exons                     | 54'367     | 54'367     | 54'367     | 54'367      | 54'367      | 54'367      | 54'367      |
| Approximate number of reads on exons      | 8'353'576  | 5'446'837  | 5'498'776  | 6'667'355   | 6'228'849   | 7'488'157   | 6'613'925   |
| Approximate mean number of reads per exon | 154        | 100        | 101        | 123         | 115         | 138         | 122         |
| Mean read depth                           | 77         | 50         | 51         | 61          | 58          | 70          | 61          |
| Mean % coverage at 1x                     | 72.68      | 65.89      | 68.41      | 71.05       | 71.97       | 71.52       | 70.25       |
| Mean % coverage at 20x                    | 56.37      | 48.31      | 51.72      | 54.04       | 54.53       | 55.22       | 53.37       |
| <b>Illumina V1 RefSeq 5'UTR</b>           | <b>44</b>  | <b>280</b> | <b>326</b> | <b>2905</b> | <b>7344</b> | <b>7739</b> | <b>Mean</b> |
| Total number of exons                     | 54'367     | 54'367     | 54'367     | 54'367      | 54'367      | 54'367      | 54'367      |
| Approximate number of reads on exons      | 5'909'735  | 6'236'696  | 5'328'908  | 7'026'514   | 6'536'708   | 4'863'018   | 5'983'597   |
| Approximate mean number of reads per exon | 109        | 115        | 98         | 129         | 120         | 89          | 110         |
| Mean read depth                           | 58         | 60         | 54         | 68          | 63          | 48          | 59          |
| Mean % coverage at 1x                     | 86.76      | 86.66      | 85.53      | 88.56       | 88.26       | 85.03       | 86.80       |
| Mean % coverage at 20x                    | 64.53      | 65.10      | 62.36      | 67.45       | 66.56       | 61.05       | 64.51       |
| <b>Agilent V1 RefSeq 3'UTR</b>            | <b>44</b>  | <b>280</b> | <b>326</b> | <b>2905</b> | <b>7344</b> | <b>7739</b> | <b>Mean</b> |
| Total number of exons                     | 38'600     | 38'600     | 38'600     | 38'600      | 38'600      | 38'600      | 38'600      |
| Approximate number of reads on exons      | 22'781'870 | 25'188'734 | 18'416'436 | 20'179'031  | 28'116'725  | 25'049'443  | 23'288'706  |
| Approximate mean number of reads per exon | 590        | 653        | 477        | 523         | 728         | 649         | 603         |
| Mean read depth                           | 76         | 82         | 60         | 66          | 92          | 82          | 76          |
| Mean % coverage at 1x                     | 82.58      | 83.15      | 81.69      | 82.32       | 83.36       | 82.82       | 82.65       |
| Mean % coverage at 20x                    | 70.26      | 71.20      | 68.70      | 69.37       | 71.76       | 70.56       | 70.31       |
| <b>NimbleGen V1 RefSeq 3'UTR</b>          | <b>44</b>  | <b>280</b> | <b>326</b> | <b>2905</b> | <b>7344</b> | <b>7739</b> | <b>Mean</b> |
| Total number of exons                     | 38'600     | 38'600     | 38'600     | 38'600      | 38'600      | 38'600      | 38'600      |
| Approximate number of reads on exons      | 43'473'480 | 31'653'358 | 30'648'749 | 34'766'931  | 32'483'625  | 38'331'765  | 35'226'318  |
| Approximate mean number of reads per exon | 1126       | 820        | 794        | 901         | 842         | 993         | 913         |
| Mean read depth                           | 116        | 80         | 79         | 91          | 86          | 103         | 92          |
| Mean % coverage at 1x                     | 90.39      | 85.73      | 86.86      | 89.62       | 89.80       | 88.68       | 88.51       |
| Mean % coverage at 20x                    | 75.98      | 69.25      | 72.10      | 74.00       | 74.00       | 74.77       | 73.35       |
| <b>Illumina V1 RefSeq 3'UTR</b>           | <b>44</b>  | <b>280</b> | <b>326</b> | <b>2905</b> | <b>7344</b> | <b>7739</b> | <b>Mean</b> |
| Total number of exons                     | 38'600     | 38'600     | 38'600     | 38'600      | 38'600      | 38'600      | 38'600      |
| Approximate number of reads on exons      | 14'879'463 | 16'813'223 | 13'545'316 | 18'384'906  | 17'152'881  | 12'513'243  | 15'548'172  |
| Approximate mean number of reads per exon | 385        | 436        | 351        | 476         | 444         | 324         | 403         |
| Mean read depth                           | 51         | 57         | 47         | 63          | 58          | 43          | 53          |
| Mean % coverage at 1x                     | 88.02      | 88.35      | 86.51      | 90.25       | 89.79       | 86.13       | 88.17       |
| Mean % coverage at 20x                    | 63.36      | 66.11      | 60.35      | 67.72       | 66.96       | 59.38       | 63.98       |

**Table S7.** Enrichment efficiency of the three enrichment platforms performed by the same vendor (V1) for intronic sequences (regions) in our region of interest (RefSeq coding exons and -50-bp and +20-bp flanking intronic sequences).

| <b>Agilent_V1_RefSeq_coding_-50 bp</b>      | <b>44</b> | <b>280</b> | <b>326</b> | <b>2905</b> | <b>7344</b> | <b>7739</b> | <b>Mean</b>      |
|---------------------------------------------|-----------|------------|------------|-------------|-------------|-------------|------------------|
| Total number of regions                     | 199'107   | 199'107    | 199'107    | 199'107     | 199'107     | 199'107     | <b>199'107</b>   |
| Approximate number of reads on regions      | 7'920'308 | 8'502'572  | 6'214'050  | 6'888'265   | 9'510'776   | 8'449'249   | <b>7'914'203</b> |
| Approximate mean number of reads per region | 40        | 43         | 31         | 35          | 48          | 42          | <b>40</b>        |
| Mean read depth                             | 80        | 85         | 62         | 69          | 96          | 85          | <b>79</b>        |
| Mean % coverage at 15×                      | 91.30     | 92.98      | 89.04      | 90.12       | 93.85       | 91.69       | <b>91.50</b>     |
| Mean % coverage at 20×                      | 87.17     | 89.56      | 83.61      | 85.22       | 90.96       | 87.95       | <b>87.41</b>     |
| <b>NimbleGen_V1_RefSeq_coding_-50 bp</b>    | <b>44</b> | <b>280</b> | <b>326</b> | <b>2905</b> | <b>7344</b> | <b>7739</b> | <b>Mean</b>      |
| Total number of regions                     | 199'107   | 199'107    | 199'107    | 199'107     | 199'107     | 199'107     | <b>199'107</b>   |
| Approximate number of reads on regions      | 9'159'017 | 6'170'791  | 6'173'059  | 7'270'276   | 6'809'552   | 8'260'991   | <b>7'307'281</b> |
| Approximate mean number of reads per region | 46        | 31         | 31         | 37          | 34          | 41          | <b>37</b>        |
| Mean read depth                             | 92        | 62         | 62         | 73          | 68          | 83          | <b>73</b>        |
| Mean % coverage at 15×                      | 83.22     | 75.16      | 78.93      | 80.70       | 81.39       | 82.00       | <b>80.23</b>     |
| Mean % coverage at 20×                      | 81.15     | 72.49      | 76.15      | 78.06       | 78.56       | 79.63       | <b>77.67</b>     |
| <b>Illumina_V1_RefSeq_coding_-50 bp</b>     | <b>44</b> | <b>280</b> | <b>326</b> | <b>2905</b> | <b>7344</b> | <b>7739</b> | <b>Mean</b>      |
| Total number of regions                     | 199'107   | 199'107    | 199'107    | 199'107     | 199'107     | 199'107     | <b>199'107</b>   |
| Approximate number of reads on regions      | 3'853'422 | 4'356'279  | 3'427'392  | 4'798'041   | 4'455'867   | 3'175'805   | <b>4'011'134</b> |
| Approximate mean number of reads per region | 19        | 22         | 17         | 24          | 22          | 16          | <b>20</b>        |
| Mean read depth                             | 39        | 44         | 34         | 48          | 45          | 32          | <b>40</b>        |
| Mean % coverage at 15×                      | 69.47     | 74.60      | 64.63      | 76.83       | 75.49       | 63.12       | <b>70.69</b>     |
| Mean % coverage at 20×                      | 59.39     | 65.20      | 54.87      | 68.03       | 66.04       | 52.51       | <b>61.01</b>     |
| <b>Agilent_V1_RefSeq_coding_+20 bp</b>      | <b>44</b> | <b>280</b> | <b>326</b> | <b>2905</b> | <b>7344</b> | <b>7739</b> | <b>Mean</b>      |
| Total number of regions                     | 197'564   | 197'564    | 197'564    | 197'564     | 197'564     | 197'564     | <b>197'564</b>   |
| Approximate number of reads on regions      | 3'518'506 | 3'754'173  | 2'751'585  | 3'037'132   | 4'200'888   | 3'771'193   | <b>3'505'579</b> |
| Approximate mean number of reads per region | 18        | 19         | 14         | 15          | 21          | 19          | <b>18</b>        |
| Mean read depth                             | 89        | 95         | 70         | 77          | 106         | 95          | <b>89</b>        |
| Mean % coverage at 15×                      | 93.40     | 94.42      | 91.40      | 92.21       | 95.12       | 93.56       | <b>93.35</b>     |
| Mean % coverage at 20×                      | 90.15     | 91.73      | 86.87      | 88.15       | 92.88       | 90.62       | <b>90.07</b>     |
| <b>NimbleGen_V1_RefSeq_coding_+20 bp</b>    | <b>44</b> | <b>280</b> | <b>326</b> | <b>2905</b> | <b>7344</b> | <b>7739</b> | <b>Mean</b>      |
| Total number of regions                     | 197'564   | 197'564    | 197'564    | 197'564     | 197'564     | 197'564     | <b>197'564</b>   |
| Approximate number of reads on regions      | 4'278'498 | 2'817'235  | 2'843'002  | 3'359'239   | 3'161'171   | 3'852'469   | <b>3'385'269</b> |
| Approximate mean number of reads per region | 22        | 14         | 14         | 17          | 16          | 19          | <b>17</b>        |
| Mean read depth                             | 108       | 71         | 72         | 85          | 80          | 97          | <b>86</b>        |
| Mean % coverage at 15×                      | 83.23     | 74.56      | 78.73      | 80.88       | 81.70       | 82.13       | <b>80.21</b>     |
| Mean % coverage at 20×                      | 81.51     | 72.47      | 76.56      | 78.81       | 79.55       | 80.24       | <b>78.19</b>     |
| <b>Illumina_V1_RefSeq_coding_+20 bp</b>     | <b>44</b> | <b>280</b> | <b>326</b> | <b>2905</b> | <b>7344</b> | <b>7739</b> | <b>Mean</b>      |
| Total number of regions                     | 197'564   | 197'564    | 197'564    | 197'564     | 197'564     | 197'564     | <b>197'564</b>   |
| Approximate number of reads on regions      | 1'766'131 | 1'992'962  | 1'992'962  | 2'203'580   | 2'039'491   | 1'459'744   | <b>1'909'145</b> |
| Approximate mean number of reads per region | 9         | 10         | 10         | 11          | 10          | 7           | <b>10</b>        |
| Mean read depth                             | 45        | 50         | 50         | 56          | 52          | 37          | <b>48</b>        |
| Mean % coverage at 15×                      | 76.66     | 80.59      | 73.27      | 82.81       | 81.58       | 71.35       | <b>77.71</b>     |
| Mean % coverage at 20×                      | 67.63     | 72.55      | 64.19      | 75.46       | 73.50       | 61.19       | <b>69.09</b>     |

**Table S8.** Uniformity of the coverage of RefSeq coding exons.

|                                                                  |           |            |            |             |             |             |                |
|------------------------------------------------------------------|-----------|------------|------------|-------------|-------------|-------------|----------------|
| <b>Agilent_V1_RefSeq_coding_region_uniformity</b>                | <b>44</b> | <b>280</b> | <b>326</b> | <b>2905</b> | <b>7344</b> | <b>7739</b> | <b>Mean</b>    |
| Total number of exons                                            | 202'044   | 202'044    | 202'044    | 202'044     | 202'044     | 202'044     | <b>202'044</b> |
| Mean read depth                                                  | 106       | 113        | 82         | 91          | 126         | 114         | <b>105</b>     |
| Exons with 100% coverage at 20×                                  | 175'281   | 179'977    | 166'032    | 169'766     | 183'167     | 176'838     | <b>175'177</b> |
| Exons with 100% coverage at 20× [%]                              | 86.75     | 89.08      | 82.18      | 84.02       | 90.66       | 87.52       | <b>86.70</b>   |
| Exons with average read depth within ±70% of mean read depth     | 160'167   | 161'721    | 161'019    | 159'423     | 160'356     | 160'068     | <b>160'459</b> |
| Exons with average read depth within ±70% of mean read depth [%] | 79.27     | 80.04      | 79.70      | 78.91       | 79.37       | 79.22       | <b>79.42</b>   |
| <b>NimbleGen_V1_RefSeq_coding_region_uniformity</b>              | <b>44</b> | <b>280</b> | <b>326</b> | <b>2905</b> | <b>7344</b> | <b>7739</b> | <b>Mean</b>    |
| Total number of exons                                            | 202'044   | 202'044    | 202'044    | 202'044     | 202'044     | 202'044     | <b>202'044</b> |
| Mean read depth                                                  | 118       | 77         | 78         | 92          | 87          | 108         | <b>93</b>      |
| Exons with 100% coverage at 20×                                  | 153'113   | 134'901    | 142'875    | 147'416     | 149'468     | 149'806     | <b>146'263</b> |
| Exons with 100% coverage at 20× [%]                              | 75.78     | 66.77      | 70.71      | 72.96       | 73.98       | 74.15       | <b>72.39</b>   |
| Exons with average read depth within ±70% of mean read depth     | 131'419   | 111'898    | 125'842    | 126'789     | 131'882     | 129'236     | <b>126'178</b> |
| Exons with average read depth within ±70% of mean read depth [%] | 65.04     | 55.38      | 62.28      | 62.75       | 65.27       | 63.96       | <b>62.45</b>   |
| <b>Illumina_V1_RefSeq_coding_region_uniformity</b>               | <b>44</b> | <b>280</b> | <b>326</b> | <b>2905</b> | <b>7344</b> | <b>7739</b> | <b>Mean</b>    |
| Total number of exons                                            | 202'044   | 202'044    | 202'044    | 202'044     | 202'044     | 202'044     | <b>202'044</b> |
| Mean read depth                                                  | 77        | 83         | 72         | 93          | 84          | 64          | <b>79</b>      |
| Exons with 100% coverage at 20×                                  | 124'912   | 134'570    | 117'424    | 141'082     | 136'283     | 111'031     | <b>127'550</b> |
| Exons with 100% coverage at 20× [%]                              | 61.82     | 66.60      | 58.12      | 69.83       | 67.45       | 54.95       | <b>63.13</b>   |
| Exons with average read depth within ±70% of mean read depth     | 150'075   | 149'421    | 154'065    | 149'234     | 149'318     | 151'963     | <b>150'679</b> |
| Exons with average read depth within ±70% of mean read depth [%] | 74.28     | 73.95      | 76.25      | 73.86       | 73.90       | 75.21       | <b>74.58</b>   |
| <b>Agilent_V2_RefSeq_coding_region_uniformity</b>                | <b>44</b> | <b>280</b> | <b>326</b> | <b>2905</b> | <b>7344</b> | <b>7739</b> | <b>Mean</b>    |
| Total number of exons                                            | 202'044   | 202'044    | 202'044    | 202'044     | 202'044     | 202'044     | <b>202'044</b> |
| Mean read depth                                                  | 156       | 144        | 140        | 114         | 137         | 142         | <b>139</b>     |
| Exons with 100% coverage at 20×                                  | 188'839   | 188'779    | 188'675    | 183'648     | 188'298     | 187'339     | <b>187'596</b> |
| Exons with 100% coverage at 20× [%]                              | 93.46     | 93.43      | 93.38      | 90.90       | 93.20       | 92.72       | <b>92.85</b>   |
| Exons with average read depth within ±70% of mean read depth     | 161'636   | 162'627    | 162'929    | 161'077     | 162'061     | 161'861     | <b>162'032</b> |
| Exons with average read depth within ±70% of mean read depth [%] | 80.00     | 80.49      | 80.64      | 79.72       | 80.21       | 80.11       | <b>80.20</b>   |
| <b>NimbleGen_V3_RefSeq_coding_region_uniformity</b>              | <b>44</b> | <b>280</b> | <b>326</b> | <b>2905</b> | <b>7344</b> | <b>7739</b> | <b>Mean</b>    |
| Total number of exons                                            | 202'044   | 202'044    | 202'044    | 202'044     | 202'044     | 202'044     | <b>202'044</b> |
| Mean read depth                                                  | 51        | 104        | 42         | 59          | 79          | 28          | <b>61</b>      |
| Exons with 100% coverage at 20×                                  | 184'605   | 193'678    | 175'023    | 181'855     | 191'318     | 114'754     | <b>173'539</b> |
| Exons with 100% coverage at 20× [%]                              | 91.37     | 95.86      | 86.63      | 90.01       | 94.69       | 56.80       | <b>85.89</b>   |
| Exons with average read depth within ±70% of mean read depth     | 192'342   | 182'511    | 192'255    | 185'321     | 187'782     | 190'225     | <b>188'406</b> |
| Exons with average read depth within ±70% of mean read depth [%] | 95.20     | 90.33      | 95.16      | 91.72       | 92.94       | 94.15       | <b>93.25</b>   |
| <b>Illumina_V4_RefSeq_coding_region_uniformity</b>               | <b>44</b> | <b>280</b> | <b>326</b> | <b>2905</b> | <b>7344</b> | <b>7739</b> | <b>Mean</b>    |
| Total number of exons                                            | 202'044   | 202'044    | 202'044    | 202'044     | 202'044     | 202'044     | <b>202'044</b> |
| Mean read depth                                                  | 53        | 45         | 55         | 55          | 52          | 46          | <b>51</b>      |
| Exons with 100% coverage at 20×                                  | 112'625   | 95'971     | 112'640    | 114'902     | 113'604     | 100'317     | <b>108'343</b> |
| Exons with 100% coverage at 20× [%]                              | 55.74     | 47.50      | 55.75      | 56.87       | 56.23       | 49.65       | <b>53.62</b>   |
| Exons with average read depth within ±70% of mean read depth     | 152'575   | 154'422    | 153'579    | 152'341     | 152'382     | 152'967     | <b>153'044</b> |
| Exons with average read depth within ±70% of mean read depth [%] | 75.52     | 76.43      | 76.01      | 75.40       | 75.42       | 75.71       | <b>75.75</b>   |

**Table S9.** Coverage of RefSeq coding exons by whole genome sequencing (WGS).

| <b>WGS RefSeq coding region</b>                                  | <b>7739_V1 (60×)</b> | <b>7344_V3 (30×)</b> | <b>7739_V3 (30×)</b> | <b>7739_V4 (30×)</b> | <b>7739_V4_X Ten (60×)</b> |
|------------------------------------------------------------------|----------------------|----------------------|----------------------|----------------------|----------------------------|
| Total number of exons                                            | 202'044              | 202'044              | 202'044              | 202'044              | 202'044                    |
| Approximate number of reads on exons                             | 11'674'285           | 5'461'115            | 5'113'945            | 7'708'299            | 22'846'600                 |
| Approximate mean number of reads per exon                        | 58                   | 27                   | 25                   | 38                   | 75                         |
| Mean read depth                                                  | 33                   | 16                   | 15                   | 22                   | 65                         |
| Mean % coverage at 10×                                           | 99.63                | 91.60                | 88.56                | 98.37                | 99.02                      |
| Mean % coverage at 20×                                           | 97.57                | 21.49                | 14.83                | 64.21                | 98.68                      |
| Exons with average read depth within ±70% of mean read depth [%] | 99.33                | 97.54                | 97.27                | 98.84                | 98.14                      |
| Exons with <100% coverage at 20× [%]                             | 12.55                | 96.92                | 98.21                | 69.81                | 1.84                       |
| Exons with <100% coverage at 15× [%]                             | 2.65                 | 79.05                | 85.42                | 37.26                | 1.55                       |
| Exons with <100% coverage at 10× [%]                             | 0.74                 | 32.17                | 40.45                | 9.12                 | 1.31                       |

X Ten, HiSeq X Ten system.

**Table S10.** Proportions of RefSeq coding exons not completely (100%) covered at 20× neither by using the three platforms alone nor in any combination. In the last row, the proportions of exons completely covered by all six platform-vendor combinations (shared exons covered at 20×) are given in italics as well. If not otherwise indicated, data of all corresponding vendors are included.

| <b>Platform(s)</b>                     | <b>44</b>     | <b>280</b>    | <b>326</b>    | <b>2905</b>   | <b>7344</b>   | <b>7739</b>   | <b>Mean*</b>              |
|----------------------------------------|---------------|---------------|---------------|---------------|---------------|---------------|---------------------------|
| Agilent (vendor V1)                    | 13.25%        | 10.92%        | 17.82%        | 15.98%        | 9.34%         | 12.48%        | <b>13.30±3.31%</b>        |
| NimbleGen (vendor V1)                  | 24.22%        | 33.23%        | 29.29%        | 27.04%        | 26.02%        | 25.85%        | <b>27.61±3.38%</b>        |
| Illumina (vendor V1)                   | 38.18%        | 33.40%        | 41.88%        | 30.17%        | 32.55%        | 45.05%        | <b>36.87±6.11%</b>        |
| Agilent (vendor V2)                    | 6.54%         | 6.57%         | 6.62%         | 9.10%         | 6.80%         | 7.28%         | <b>7.15±1.05%</b>         |
| NimbleGen (vendor V3)                  | 8.63%         | 4.14%         | 13.37%        | 9.99%         | 5.31%         | 43.20%        | <b>14.11±15.36%</b>       |
| Illumina (vendor V4)                   | 44.26%        | 52.50%        | 44.25%        | 43.13%        | 43.77%        | 50.35%        | <b>46.38±4.19%</b>        |
| Agilent (vendors V1 and V2)            | 6.36%         | 6.21%         | 6.54%         | 8.51%         | 6.19%         | 6.87%         | <b>6.78±0.93%</b>         |
| NimbleGen (vendors V1 and V3)          | 6.33%         | 3.25%         | 10.24%        | 7.92%         | 4.19%         | 20.74%        | <b>8.78±6.7%</b>          |
| Illumina (vendors V1 and V4)           | 31.20%        | 29.90%        | 33.34%        | 25.96%        | 27.38%        | 37.12%        | <b>30.82±4.27%</b>        |
| Agilent and NimbleGen                  | 2.08%         | 1.78%         | 2.49%         | 2.41%         | 1.98%         | 3.19%         | <b>2.32±0.53%</b>         |
| Agilent and Illumina                   | 2.95%         | 2.83%         | 3.10%         | 3.32%         | 2.63%         | 3.48%         | <b>3.05±0.33%</b>         |
| NimbleGen and Illumina                 | 3.45%         | 2.13%         | 4.91%         | 3.47%         | 2.48%         | 8.37%         | <b>4.13±2.40%</b>         |
| All three platforms                    | 1.58%         | 1.39%         | 1.78%         | 1.55%         | 1.50%         | 2.11%         | <b>1.65±0.27%</b>         |
| <i>Shared exons covered at 20× [%]</i> | <i>32.24%</i> | <i>25.60%</i> | <i>27.68%</i> | <i>33.01%</i> | <i>34.15%</i> | <i>19.65%</i> | <b><i>28.72±5.81%</i></b> |

\*Indicated ranges for mean values (±) represent 95% confidence intervals.



**Table S11.** Coverage of RefSeq coding exons of ~7600 genes targeted by the Accuracy and Content Enhanced (ACEv2) clinical exome platform of Personalis (www.personalis.com) achieved using WES at 100×, WGS at 30× and 60×, and Personalis ACEv2 at 60×.

|                                     | <b>Total exons</b> | <b>Mean read depth</b> | <b>Mean coverage at 20× [%]</b> | <b>Exons with &lt;100% coverage at 20× [%]</b> | <b>Exons with &lt;100% coverage at 15× [%]</b> | <b>Exons with &lt;100% coverage at 10× [%]</b> |
|-------------------------------------|--------------------|------------------------|---------------------------------|------------------------------------------------|------------------------------------------------|------------------------------------------------|
| 7739_Agilent_V1                     | 99'236             | 115                    | 95.98                           | 11.50                                          | 7.50                                           | 4.36                                           |
| 7739_Agilent_V2                     | 99'236             | 143                    | 97.41                           | 6.31                                           | 4.10                                           | 2.55                                           |
| 7739_NimbleGen_V1                   | 99'236             | 109                    | 82.59                           | 24.26                                          | 22.35                                          | 20.33                                          |
| 7739_NimbleGen_V3                   | 99'236             | 28                     | 81.37                           | 41.69                                          | 20.51                                          | 8.29                                           |
| 7739_Illumina_V1                    | 99'236             | 63                     | 83.79                           | 46.07                                          | 35.60                                          | 23.76                                          |
| 7739_Illumina_V4                    | 99'236             | 47                     | 81.79                           | 47.52                                          | 34.74                                          | 21.62                                          |
| 7739_WGS_V3_30×                     | 99'236             | 15                     | 15.47                           | 97.98                                          | 85.04                                          | 39.23                                          |
| 7739_WGS_V4_30×                     | 99'236             | 22                     | 65.18                           | 69.35                                          | 36.09                                          | 8.55                                           |
| 7739_WGS_V1_60×                     | 99'236             | 34                     | 97.72                           | 11.83                                          | 2.39                                           | 0.71                                           |
| 7739_WGS_XTen_V4_60× (non-PCR-free) | 99'236             | 66                     | 98.91                           | 1.50                                           | 1.26                                           | 1.08                                           |
| 7739_Personalis                     | 99'236             | 68                     | 96.75                           | 12.54                                          | 5.48                                           | 1.73                                           |
| 374_Personalis (additional DNA 1)   | 99'236             | 72                     | 97.44                           | 9.83                                           | 4.02                                           | 1.21                                           |
| 7498_Personalis (additional DNA 2)  | 99'236             | 68                     | 96.53                           | 12.39                                          | 5.32                                           | 1.56                                           |

**Table S12.** Enrichment efficiency of the three enrichment platforms performed by different vendors (V2-V4) for RefSeq exons.

| <b>Agilent_V2_RefSeq_all</b>              | <b>44</b>  | <b>280</b> | <b>326</b> | <b>2905</b> | <b>7344</b> | <b>7739</b> | <b>Mean</b> |
|-------------------------------------------|------------|------------|------------|-------------|-------------|-------------|-------------|
| Total number of exons                     | 232'619    | 232'619    | 232'619    | 232'619     | 232'619     | 232'619     | 232'619     |
| Approximate number of reads on exons      | 91'956'375 | 85'988'017 | 83'572'762 | 68'364'391  | 82'213'511  | 83'948'932  | 82'673'998  |
| Approximate mean number of reads per exon | 395        | 370        | 359        | 294         | 353         | 361         | 355         |
| Mean read depth                           | 132        | 121        | 118        | 96          | 116         | 120         | 117         |
| Mean % coverage at 1x                     | 95.15      | 94.48      | 94.72      | 94.57       | 94.78       | 94.63       | 94.72       |
| Mean % coverage at 20x                    | 85.93      | 85.79      | 85.77      | 84.83       | 85.65       | 85.58       | 85.59       |
| <b>NimbleGen_V3_RefSeq_all</b>            | <b>44</b>  | <b>280</b> | <b>326</b> | <b>2905</b> | <b>7344</b> | <b>7739</b> | <b>Mean</b> |
| Total number of exons                     | 232'619    | 232'619    | 232'619    | 232'619     | 232'619     | 232'619     | 232'619     |
| Approximate number of reads on exons      | 37'142'009 | 83'642'818 | 31'319'114 | 45'838'652  | 61'584'881  | 20'887'479  | 46'735'825  |
| Approximate mean number of reads per exon | 160        | 360        | 135        | 197         | 265         | 90          | 201         |
| Mean read depth                           | 48         | 98         | 40         | 56          | 74          | 26          | 57          |
| Mean % coverage at 1x                     | 95.53      | 96.10      | 95.26      | 95.81       | 96.00       | 94.99       | 95.61       |
| Mean % coverage at 20x                    | 89.58      | 92.04      | 87.36      | 88.74       | 91.25       | 73.80       | 87.13       |
| <b>Illumina_V4_RefSeq_all</b>             | <b>44</b>  | <b>280</b> | <b>326</b> | <b>2905</b> | <b>7344</b> | <b>7739</b> | <b>Mean</b> |
| Total number of exons                     | 232'619    | 232'619    | 232'619    | 232'619     | 232'619     | 232'619     | 232'619     |
| Approximate number of reads on exons      | 29'121'995 | 24'223'385 | 29'600'776 | 30'262'529  | 29'426'507  | 25'627'386  | 28'043'763  |
| Approximate mean number of reads per exon | 125        | 104        | 127        | 130         | 127         | 110         | 121         |
| Mean read depth                           | 48         | 41         | 50         | 51          | 48          | 42          | 47          |
| Mean % coverage at 1x                     | 88.10      | 87.93      | 88.11      | 88.22       | 88.18       | 88.02       | 88.09       |
| Mean % coverage at 20x                    | 76.25      | 72.23      | 76.57      | 76.74       | 76.39       | 73.18       | 75.23       |
| <b>Agilent_V2_RefSeq_coding region</b>    | <b>44</b>  | <b>280</b> | <b>326</b> | <b>2905</b> | <b>7344</b> | <b>7739</b> | <b>Mean</b> |
| Total number of exons                     | 202'044    | 202'044    | 202'044    | 202'044     | 202'044     | 202'044     | 202'044     |
| Approximate number of reads on exons      | 57'570'213 | 52'867'135 | 51'777'832 | 42'473'247  | 50'455'925  | 52'303'873  | 51'241'371  |
| Approximate mean number of reads per exon | 285        | 262        | 256        | 210         | 250         | 259         | 254         |
| Mean read depth                           | 156        | 144        | 140        | 114         | 137         | 142         | 139         |
| Mean % coverage at 1x                     | 99.19      | 99.13      | 99.19      | 99.26       | 99.16       | 99.14       | 99.18       |
| Mean % coverage at 15x                    | 97.59      | 97.49      | 97.49      | 97.07       | 97.42       | 97.42       | 97.42       |
| Mean % coverage at 20x                    | 96.96      | 96.82      | 96.81      | 95.92       | 96.69       | 96.67       | 96.65       |
| <b>NimbleGen_V3_RefSeq_coding region</b>  | <b>44</b>  | <b>280</b> | <b>326</b> | <b>2905</b> | <b>7344</b> | <b>7739</b> | <b>Mean</b> |
| Total number of exons                     | 202'044    | 202'044    | 202'044    | 202'044     | 202'044     | 202'044     | 202'044     |
| Approximate number of reads on exons      | 18'364'643 | 39'619'058 | 15'302'804 | 21'727'594  | 29'212'627  | 10'084'786  | 22'385'252  |
| Approximate mean number of reads per exon | 91         | 196        | 76         | 108         | 145         | 50          | 111         |
| Mean read depth                           | 51         | 104        | 42         | 59          | 79          | 28          | 61          |
| Mean % coverage at 1x                     | 98.63      | 98.72      | 98.56      | 98.76       | 98.75       | 98.52       | 98.66       |
| Mean % coverage at 15x                    | 96.71      | 97.65      | 95.78      | 96.26       | 97.34       | 89.99       | 95.62       |
| Mean % coverage at 20x                    | 95.39      | 97.14      | 93.37      | 94.51       | 96.61       | 79.76       | 92.80       |
| <b>Illumina_V4_RefSeq_coding region</b>   | <b>44</b>  | <b>280</b> | <b>326</b> | <b>2905</b> | <b>7344</b> | <b>7739</b> | <b>Mean</b> |
| Total number of exons                     | 202'044    | 202'044    | 202'044    | 202'044     | 202'044     | 202'044     | 202'044     |
| Approximate number of reads on exons      | 18'228'955 | 15'256'346 | 18'765'557 | 19'068'256  | 18'356'073  | 15'984'498  | 17'609'947  |
| Approximate mean number of reads per exon | 90         | 76         | 93         | 94          | 91          | 79          | 87          |
| Mean read depth                           | 53         | 45         | 55         | 55          | 52          | 46          | 51          |
| Mean % coverage at 1x                     | 94.30      | 94.23      | 94.32      | 94.41       | 94.34       | 94.26       | 94.31       |
| Mean % coverage at 15x                    | 88.09      | 85.39      | 88.24      | 88.33       | 88.27       | 86.20       | 87.42       |
| Mean % coverage at 20x                    | 83.17      | 79.06      | 83.67      | 83.73       | 83.28       | 79.88       | 82.13       |
| <b>Agilent_V2_RefSeq_5'UTR</b>            | <b>44</b>  | <b>280</b> | <b>326</b> | <b>2905</b> | <b>7344</b> | <b>7739</b> | <b>Mean</b> |
| Total number of exons                     | 54'367     | 54'367     | 54'367     | 54'367      | 54'367      | 54'367      | 54'367      |
| Approximate number of reads on exons      | 9'544'557  | 8'639'899  | 8'605'274  | 7'141'824   | 8'259'030   | 8'543'370   | 8'455'659   |
| Approximate mean number of reads per exon | 176        | 159        | 158        | 131         | 152         | 157         | 156         |
| Mean read depth                           | 113        | 102        | 101        | 83          | 97          | 101         | 100         |
| Mean % coverage at 1x                     | 88.33      | 86.25      | 86.87      | 86.31       | 87.06       | 86.78       | 86.93       |
| Mean % coverage at 20x                    | 62.99      | 62.54      | 62.80      | 61.97       | 62.30       | 62.34       | 62.49       |
| <b>NimbleGen_V3_RefSeq_5'UTR</b>          | <b>44</b>  | <b>280</b> | <b>326</b> | <b>2905</b> | <b>7344</b> | <b>7739</b> | <b>Mean</b> |
| Total number of exons                     | 54'367     | 54'367     | 54'367     | 54'367      | 54'367      | 54'367      | 54'367      |
| Approximate number of reads on exons      | 4'208'508  | 8'995'809  | 3'490'069  | 4'840'571   | 6'547'724   | 2'248'176   | 5'055'143   |
| Approximate mean number of reads per exon | 77         | 165        | 64         | 89          | 120         | 41          | 93          |
| Mean read depth                           | 39         | 79         | 32         | 44          | 59          | 21          | 46          |
| Mean % coverage at 1x                     | 91.62      | 92.85      | 90.96      | 91.94       | 92.50       | 90.20       | 91.68       |
| Mean % coverage at 20x                    | 76.14      | 81.70      | 71.76      | 73.82       | 79.44       | 54.12       | 72.83       |
| <b>Illumina_V4_RefSeq_5'UTR</b>           | <b>44</b>  | <b>280</b> | <b>326</b> | <b>2905</b> | <b>7344</b> | <b>7739</b> | <b>Mean</b> |
| Total number of exons                     | 54'367     | 54'367     | 54'367     | 54'367      | 54'367      | 54'367      | 54'367      |
| Approximate number of reads on exons      | 3'836'677  | 3'138'739  | 3'895'716  | 3'940'321   | 3'835'576   | 3'385'497   | 3'672'088   |
| Approximate mean number of reads per exon | 71         | 58         | 72         | 72          | 71          | 62          | 68          |
| Mean read depth                           | 39         | 32         | 40         | 40          | 39          | 34          | 37          |
| Mean % coverage at 1x                     | 75.70      | 75.33      | 75.72      | 75.75       | 75.81       | 75.59       | 75.65       |
| Mean % coverage at 20x                    | 59.32      | 54.96      | 59.24      | 59.55       | 59.51       | 56.63       | 58.20       |
| <b>Agilent_V2_RefSeq_3'UTR</b>            | <b>44</b>  | <b>280</b> | <b>326</b> | <b>2905</b> | <b>7344</b> | <b>7739</b> | <b>Mean</b> |
| Total number of exons                     | 38'600     | 38'600     | 38'600     | 38'600      | 38'600      | 38'600      | 38'600      |
| Approximate number of reads on exons      | 32'871'014 | 32'041'868 | 30'475'740 | 24'734'719  | 30'719'883  | 30'428'127  | 30'211'892  |
| Approximate mean number of reads per exon | 852        | 830        | 790        | 641         | 796         | 788         | 783         |
| Mean read depth                           | 111        | 106        | 101        | 82          | 101         | 102         | 100         |
| Mean % coverage at 1x                     | 89.20      | 88.12      | 88.65      | 88.11       | 88.73       | 88.22       | 88.51       |
| Mean % coverage at 20x                    | 73.02      | 73.07      | 72.96      | 71.98       | 72.98       | 72.66       | 72.78       |
| <b>NimbleGen_V3_RefSeq_3'UTR</b>          | <b>44</b>  | <b>280</b> | <b>326</b> | <b>2905</b> | <b>7344</b> | <b>7739</b> | <b>Mean</b> |
| Total number of exons                     | 38'600     | 38'600     | 38'600     | 38'600      | 38'600      | 38'600      | 38'600      |
| Approximate number of reads on exons      | 17'649'879 | 41'978'965 | 15'133'918 | 23'142'414  | 30'974'043  | 10'299'582  | 23'196'467  |
| Approximate mean number of reads per exon | 457        | 1088       | 392        | 600         | 802         | 267         | 601         |
| Mean read depth                           | 45         | 102        | 38         | 56          | 75          | 26          | 57          |
| Mean % coverage at 1x                     | 89.12      | 90.60      | 88.53      | 89.87       | 90.33       | 87.93       | 89.39       |
| Mean % coverage at 20x                    | 80.67      | 83.84      | 79.13      | 81.26       | 83.08       | 69.53       | 79.59       |
| <b>Illumina_V4_RefSeq_3'UTR</b>           | <b>44</b>  | <b>280</b> | <b>326</b> | <b>2905</b> | <b>7344</b> | <b>7739</b> | <b>Mean</b> |
| Total number of exons                     | 38'600     | 38'600     | 38'600     | 38'600      | 38'600      | 38'600      | 38'600      |
| Approximate number of reads on exons      | 9'237'507  | 7'648'746  | 9'160'291  | 9'529'750   | 9'436'549   | 8'171'583   | 8'864'070   |
| Approximate mean number of reads per exon | 239        | 198        | 237        | 247         | 244         | 212         | 230         |
| Mean read depth                           | 31         | 26         | 31         | 32          | 31          | 27          | 30          |
| Mean % coverage at 1x                     | 75.45      | 74.74      | 75.34      | 75.63       | 75.72       | 75.16       | 75.34       |
| Mean % coverage at 20x                    | 54.27      | 48.44      | 53.00      | 54.55       | 55.19       | 50.81       | 52.71       |

**Table S13.** Enrichment efficiency of the three enrichment platforms performed by different vendors (V2-V4) for intronic sequences (regions) in our region of interest (RefSeq coding exons and -50-bp and +20-bp flanking intronic sequences).

| <b>Agilent_V2_RefSeq_coding_-50 bp</b>      | <b>44</b>  | <b>280</b> | <b>326</b> | <b>2905</b> | <b>7344</b> | <b>7739</b> | <b>Mean</b>       |
|---------------------------------------------|------------|------------|------------|-------------|-------------|-------------|-------------------|
| Total number of regions                     | 199'107    | 199'107    | 199'107    | 199'107     | 199'107     | 199'107     | <b>199'107</b>    |
| Approximate number of reads on regions      | 11'745'824 | 10'987'395 | 10'673'000 | 8'776'634   | 10'526'929  | 10'697'536  | <b>10'567'886</b> |
| Approximate mean number of reads per region | 59         | 55         | 54         | 44          | 53          | 54          | <b>53</b>         |
| Mean read depth                             | 118        | 110        | 107        | 88          | 106         | 107         | <b>106</b>        |
| Mean % coverage at 15x                      | 95.36      | 95.59      | 95.49      | 94.14       | 95.51       | 94.97       | <b>95.18</b>      |
| Mean % coverage at 20x                      | 93.20      | 93.58      | 93.35      | 90.96       | 93.40       | 92.60       | <b>92.85</b>      |
| <b>NimbleGen_V3_RefSeq_coding_-50 bp</b>    | <b>44</b>  | <b>280</b> | <b>326</b> | <b>2905</b> | <b>7344</b> | <b>7739</b> | <b>Mean</b>       |
| Total number of regions                     | 199'107    | 199'107    | 199'107    | 199'107     | 199'107     | 199'107     | <b>199'107</b>    |
| Approximate number of reads on regions      | 4'193'288  | 8'643'131  | 3'535'739  | 4'957'626   | 6'606'299   | 2'341'553   | <b>5'046'273</b>  |
| Approximate mean number of reads per region | 21         | 43         | 18         | 25          | 33          | 12          | <b>25</b>         |
| Mean read depth                             | 42         | 87         | 36         | 50          | 66          | 24          | <b>51</b>         |
| Mean % coverage at 15x                      | 95.04      | 97.23      | 93.01      | 94.58       | 96.68       | 81.11       | <b>92.94</b>      |
| Mean % coverage at 20x                      | 91.34      | 96.36      | 86.93      | 91.25       | 95.34       | 64.00       | <b>87.54</b>      |
| <b>Illumina_V4_RefSeq_coding_-50 bp</b>     | <b>44</b>  | <b>280</b> | <b>326</b> | <b>2905</b> | <b>7344</b> | <b>7739</b> | <b>Mean</b>       |
| Total number of regions                     | 199'107    | 199'107    | 199'107    | 199'107     | 199'107     | 199'107     | <b>199'107</b>    |
| Approximate number of reads on regions      | 2'636'469  | 2'207'057  | 2'618'019  | 2'748'245   | 2'670'685   | 2'324'392   | <b>2'534'145</b>  |
| Approximate mean number of reads per region | 13         | 11         | 13         | 14          | 13          | 12          | <b>13</b>         |
| Mean read depth                             | 26         | 22         | 26         | 28          | 27          | 23          | <b>25</b>         |
| Mean % coverage at 15x                      | 59.01      | 52.53      | 58.01      | 60.18       | 59.84       | 54.55       | <b>57.35</b>      |
| Mean % coverage at 20x                      | 47.52      | 41.00      | 46.69      | 49.09       | 48.31       | 42.68       | <b>45.88</b>      |
| <b>Agilent_V2_RefSeq_coding_+20 bp</b>      | <b>44</b>  | <b>280</b> | <b>326</b> | <b>2905</b> | <b>7344</b> | <b>7739</b> | <b>Mean</b>       |
| Total number of regions                     | 197'564    | 197'564    | 197'564    | 197'564     | 197'564     | 197'564     | <b>197'564</b>    |
| Approximate number of reads on regions      | 5'151'344  | 4'799'004  | 4'665'424  | 3'820'170   | 4'585'481   | 4'691'331   | <b>4'618'792</b>  |
| Approximate mean number of reads per region | 26         | 24         | 24         | 19          | 23          | 24          | <b>23</b>         |
| Mean read depth                             | 130        | 121        | 118        | 97          | 116         | 119         | <b>117</b>        |
| Mean % coverage at 15x                      | 96.39      | 96.42      | 96.39      | 95.43       | 96.31       | 96.11       | <b>96.17</b>      |
| Mean % coverage at 20x                      | 94.90      | 94.89      | 94.84      | 93.11       | 94.70       | 94.36       | <b>94.47</b>      |
| <b>NimbleGen_V3_RefSeq_coding_+20 bp</b>    | <b>44</b>  | <b>280</b> | <b>326</b> | <b>2905</b> | <b>7344</b> | <b>7739</b> | <b>Mean</b>       |
| Total number of regions                     | 197'564    | 197'564    | 197'564    | 197'564     | 197'564     | 197'564     | <b>197'564</b>    |
| Approximate number of reads on regions      | 1'841'585  | 3'836'958  | 1'553'456  | 2'177'374   | 2'914'931   | 1'021'349   | <b>2'224'276</b>  |
| Approximate mean number of reads per region | 9          | 19         | 8          | 11          | 15          | 5           | <b>11</b>         |
| Mean read depth                             | 47         | 97         | 39         | 55          | 74          | 26          | <b>56</b>         |
| Mean % coverage at 15x                      | 96.11      | 97.42      | 94.77      | 95.52       | 97.03       | 86.34       | <b>94.53</b>      |
| Mean % coverage at 20x                      | 93.99      | 96.79      | 91.08      | 93.09       | 96.08       | 72.77       | <b>90.63</b>      |
| <b>Illumina_V4_RefSeq_coding_+20 bp</b>     | <b>44</b>  | <b>280</b> | <b>326</b> | <b>2905</b> | <b>7344</b> | <b>7739</b> | <b>Mean</b>       |
| Total number of regions                     | 197'564    | 197'564    | 197'564    | 197'564     | 197'564     | 197'564     | <b>197'564</b>    |
| Approximate number of reads on regions      | 1'270'409  | 1'059'550  | 1'275'194  | 1'325'726   | 1'287'699   | 1'119'616   | <b>1'223'032</b>  |
| Approximate mean number of reads per region | 6          | 5          | 6          | 7           | 7           | 6           | <b>6</b>          |
| Mean read depth                             | 32         | 27         | 32         | 34          | 33          | 28          | <b>31</b>         |
| Mean % coverage at 15x                      | 72.12      | 65.46      | 71.51      | 72.77       | 72.80       | 68.02       | <b>70.45</b>      |
| Mean % coverage at 20x                      | 61.06      | 53.39      | 60.71      | 62.41       | 61.81       | 55.83       | <b>59.20</b>      |

**Table S14.** Enrichment efficiency of the three platforms performed by the same vendor (V1) for our panel of eight genes (exons including UTR).

| <b>Agilent_V1_gene panel</b>              | <b>44</b> | <b>280</b> | <b>326</b> | <b>2905</b> | <b>7344</b> | <b>7739</b> | <b>Mean</b>   |
|-------------------------------------------|-----------|------------|------------|-------------|-------------|-------------|---------------|
| Total number of exons                     | 169       | 169        | 169        | 169         | 169         | 169         | <b>169</b>    |
| Approximate number of reads on exons      | 43'286    | 47'277     | 35'254     | 39'553      | 53'291      | 49'016      | <b>44'612</b> |
| Approximate mean number of reads per exon | 256       | 280        | 209        | 234         | 315         | 290         | <b>264</b>    |
| Mean read depth                           | 95        | 103        | 76         | 85          | 117         | 108         | <b>97</b>     |
| Mean % coverage at 1×                     | 97.54     | 97.54      | 97.43      | 97.62       | 97.93       | 98.28       | <b>97.72</b>  |
| Mean % coverage at 20×                    | 93.85     | 95.29      | 91.75      | 93.18       | 94.96       | 94.43       | <b>93.91</b>  |
| <b>NimbleGen_V1_gene panel</b>            | <b>44</b> | <b>280</b> | <b>326</b> | <b>2905</b> | <b>7344</b> | <b>7739</b> | <b>Mean</b>   |
| Total number of exons                     | 169       | 169        | 169        | 169         | 169         | 169         | <b>169</b>    |
| Approximate number of reads on exons      | 66'968    | 48'757     | 47'518     | 55'857      | 49'783      | 60'856      | <b>54'956</b> |
| Approximate mean number of reads per exon | 396       | 289        | 281        | 331         | 295         | 360         | <b>325</b>    |
| Mean read depth                           | 133       | 92         | 91         | 110         | 99          | 124         | <b>108</b>    |
| Mean % coverage at 1×                     | 96.36     | 94.48      | 96.11      | 96.51       | 96.42       | 96.09       | <b>96.00</b>  |
| Mean % coverage at 20×                    | 92.48     | 85.32      | 88.16      | 90.46       | 91.05       | 91.32       | <b>89.80</b>  |
| <b>Illumina_V1_gene panel</b>             | <b>44</b> | <b>280</b> | <b>326</b> | <b>2905</b> | <b>7344</b> | <b>7739</b> | <b>Mean</b>   |
| Total number of exons                     | 169       | 169        | 169        | 169         | 169         | 169         | <b>169</b>    |
| Approximate number of reads on exons      | 26'343    | 29'196     | 25'726     | 32'869      | 29'335      | 23'761      | <b>27'872</b> |
| Approximate mean number of reads per exon | 156       | 173        | 152        | 194         | 174         | 141         | <b>165</b>    |
| Mean read depth                           | 73        | 80         | 74         | 90          | 79          | 66          | <b>77</b>     |
| Mean % coverage at 1×                     | 98.63     | 98.87      | 98.61      | 98.91       | 98.91       | 98.80       | <b>98.79</b>  |
| Mean % coverage at 20×                    | 89.48     | 91.22      | 88.69      | 89.90       | 91.03       | 87.13       | <b>89.58</b>  |

**Table S15.** Enrichment efficiency of the three platforms performed by different vendors (V2-V4) for our panel of eight genes (exons including UTR).

| <b>Agilent_V2_gene panel</b>              | <b>44</b> | <b>280</b> | <b>326</b> | <b>2905</b> | <b>7344</b> | <b>7739</b> | <b>Mean</b>   |
|-------------------------------------------|-----------|------------|------------|-------------|-------------|-------------|---------------|
| Total number of exons                     | 169       | 169        | 169        | 169         | 169         | 169         | <b>169</b>    |
| Approximate number of reads on exons      | 62'943    | 60'283     | 58'613     | 47'919      | 58'348      | 59'046      | <b>57'859</b> |
| Approximate mean number of reads per exon | 372       | 357        | 347        | 284         | 345         | 349         | <b>342</b>    |
| Mean read depth                           | 140       | 130        | 128        | 105         | 127         | 130         | <b>127</b>    |
| Mean % coverage at 1×                     | 98.81     | 99.35      | 99.07      | 98.40       | 99.23       | 98.91       | <b>98.96</b>  |
| Mean % coverage at 20×                    | 95.77     | 96.54      | 95.98      | 95.12       | 96.38       | 95.82       | <b>95.94</b>  |
| <b>NimbleGen_V3_gene panel</b>            | <b>44</b> | <b>280</b> | <b>326</b> | <b>2905</b> | <b>7344</b> | <b>7739</b> | <b>Mean</b>   |
| Total number of exons                     | 169       | 169        | 169        | 169         | 169         | 169         | <b>169</b>    |
| Approximate number of reads on exons      | 27'184    | 62'876     | 23'432     | 35'907      | 46'672      | 16'157      | <b>35'371</b> |
| Approximate mean number of reads per exon | 161       | 372        | 139        | 212         | 276         | 96          | <b>209</b>    |
| Mean read depth                           | 53        | 115        | 45         | 66          | 86          | 31          | <b>66</b>     |
| Mean % coverage at 1×                     | 99.99     | 100.00     | 100.00     | 100.00      | 100.00      | 99.79       | <b>99.96</b>  |
| Mean % coverage at 20×                    | 96.42     | 98.53      | 96.31      | 96.51       | 98.63       | 88.86       | <b>95.88</b>  |
| <b>Illumina_V4_gene panel</b>             | <b>44</b> | <b>280</b> | <b>326</b> | <b>2905</b> | <b>7344</b> | <b>7739</b> | <b>Mean</b>   |
| Total number of exons                     | 169       | 169        | 169        | 169         | 169         | 169         | <b>169</b>    |
| Approximate number of reads on exons      | 21'118    | 17'873     | 22'377     | 22'273      | 21'260      | 19'030      | <b>20'655</b> |
| Approximate mean number of reads per exon | 125       | 106        | 132        | 132         | 126         | 113         | <b>122</b>    |
| Mean read depth                           | 59        | 51         | 64         | 63          | 59          | 52          | <b>58</b>     |
| Mean % coverage at 1×                     | 98.93     | 98.73      | 98.77      | 98.71       | 98.81       | 98.52       | <b>98.74</b>  |
| Mean % coverage at 20×                    | 90.59     | 89.01      | 91.84      | 93.09       | 91.21       | 89.76       | <b>90.92</b>  |

**Table S16.** Number of heterozygous SNVs and indels identified by Sanger sequencing in the six DNA samples of this study. The number of homozygous SNVs is given in parentheses.

| <b>Sample</b> | <b>SNVs</b>     |               |               |              | <b>Indels</b> |              |               |              |
|---------------|-----------------|---------------|---------------|--------------|---------------|--------------|---------------|--------------|
|               | <b>Total</b>    | <b>ROI</b>    | <b>Coding</b> | <b>UTR</b>   | <b>Total</b>  | <b>ROI</b>   | <b>Coding</b> | <b>UTR</b>   |
| 44            | 16 (2)          | 4 (1)         | 1 (0)         | 2 (1)        | 3 (1)         | 0 (0)        | 0 (0)         | 0 (0)        |
| 280           | 10 (0)          | 4 (0)         | 0 (0)         | 1 (0)        | 3 (0)         | 1 (0)        | 1 (0)         | 0 (0)        |
| 326           | 1 (2)           | 1 (1)         | 0 (0)         | 0 (0)        | 1 (0)         | 1 (0)        | 1 (0)         | 0 (0)        |
| 2905          | 42 (2)          | 16 (2)        | 6 (0)         | 1 (0)        | 6 (0)         | 2 (0)        | 0 (0)         | 0 (0)        |
| 7344          | 39 (2)          | 18 (1)        | 8 (0)         | 1 (1)        | 6 (1)         | 3 (0)        | 1 (0)         | 0 (0)        |
| 7739          | 17 (3)          | 6 (0)         | 2 (0)         | 2 (0)        | 1 (0)         | 0 (0)        | 0 (0)         | 0 (0)        |
| <b>Total</b>  | <b>125 (11)</b> | <b>49 (5)</b> | <b>17 (0)</b> | <b>7 (2)</b> | <b>20 (2)</b> | <b>7 (0)</b> | <b>3 (0)</b>  | <b>0 (0)</b> |

ROI: region of interest (coding region with 50-bp upstream and 20-bp downstream intronic sequences).

**Table S17.** Efficiency and reproducibility of the three enrichment platforms for different heterozygous SNVs detected by Sanger sequencing. In the number pairs (m/n), the first number (m) represents number of different heterozygous SNVs obtained in at least one sample with sufficient number of reads ( $\geq 20$ ). The second number (n) represents number of heterozygous positions detected by Sanger sequencing, which were identified in particular data sets with correct genotype and by at least one read.

| Total                                                                                               |            |         |         |         |          |          |                                |         |         |         |          |          |                                                       |         |         |         |          |          |
|-----------------------------------------------------------------------------------------------------|------------|---------|---------|---------|----------|----------|--------------------------------|---------|---------|---------|----------|----------|-------------------------------------------------------|---------|---------|---------|----------|----------|
|                                                                                                     | Total SNVs |         |         |         |          |          | SNVs in designed target region |         |         |         |          |          | SNVs in designed target region of all three platforms |         |         |         |          |          |
| Heterozygous                                                                                        | AG (V1)    | AG (V2) | NG (V1) | NG (V3) | ILL (V1) | ILL (V4) | AG (V1)                        | AG (V2) | NG (V1) | NG (V3) | ILL (V1) | ILL (V4) | AG (V1)                                               | AG (V2) | NG (V1) | NG (V3) | ILL (V1) | ILL (V4) |
| 1/6 samples                                                                                         | 30/44      | 36/43   | 39/42   | 38/44   | 28/42    | 21/32    | 21/26                          | 24/26   | 30/30   | 30/31   | 9/9      | 8/9      | 8/8                                                   | 8/8     | 8/8     | 8/8     | 8/8      | 7/8      |
| 2/6 samples                                                                                         | 21/24      | 22/25   | 23/24   | 22/25   | 12/24    | 10/16    | 13/13                          | 13/13   | 17/17   | 16/17   | 6/6      | 6/6      | 6/6                                                   | 6/6     | 6/6     | 6/6     | 6/6      | 6/6      |
| 3/6 samples                                                                                         | 7/7        | 7/7     | 7/7     | 5/6     | 1/5      | 1/5      | 3/3                            | 3/3     | 6/6     | 5/6     | 1/1      | 1/1      | 1/1                                                   | 1/1     | 1/1     | 1/1     | 1/1      | 1/1      |
| 4/6 samples                                                                                         | 2/2        | 2/2     | 2/2     | 0/1     | 0/2      | 0        | 1/1                            | 1/1     | 0       | 0       | 0        | 0        | 0                                                     | 0       | 0       | 0       | 0        | 0        |
| >1 sample                                                                                           | 30/33      | 31/34   | 32/33   | 27/32   | 13/31    | 11/21    | 17/17                          | 17/17   | 23/23   | 21/23   | 7/7      | 7/7      | 7/7                                                   | 7/7     | 7/7     | 7/7     | 7/7      | 7/7      |
| Positions with CR                                                                                   | 2          | 1       | 1       | 4       | 2        | 5        | 0                              | 0       | 0       | 2       | 0        | 0        | 0                                                     | 0       | 0       | 0       | 0        | 0        |
| True results                                                                                        | 77         | 77      | 75      | 76      | 73       | 53       | 43                             | 43      | 53      | 54      | 16       | 16       | 15                                                    | 15      | 15      | 15      | 15       | 15       |
| False and NA results                                                                                | 1          | 1       | 3       | 2       | 5        | 25       | 0                              | 0       | 1       | 0       | 0        | 0        | 0                                                     | 0       | 0       | 0       | 0        | 0        |
| Region of interest (ROI, coding region with 50-bp upstream and 20-bp downstream intronic sequences) |            |         |         |         |          |          |                                |         |         |         |          |          |                                                       |         |         |         |          |          |
|                                                                                                     | Total SNVs |         |         |         |          |          | SNVs in designed target region |         |         |         |          |          | SNVs in designed target region of all three platforms |         |         |         |          |          |
| Heterozygous                                                                                        | AG (V1)    | AG (V2) | NG (V1) | NG (V3) | ILL (V1) | ILL (V4) | AG (V1)                        | AG (V2) | NG (V1) | NG (V3) | ILL (V1) | ILL (V4) | AG (V1)                                               | AG (V2) | NG (V1) | NG (V3) | ILL (V1) | ILL (V4) |
| 1/6 samples                                                                                         | 13/16      | 14/16   | 16/16   | 16/16   | 14/16    | 14/16    | 12/15                          | 13/15   | 16/16   | 16/16   | 6/6      | 6/6      | 6/6                                                   | 6/6     | 6/6     | 6/6     | 6/6      | 6/6      |
| 2/6 samples                                                                                         | 9/9        | 9/9     | 9/9     | 8/9     | 7/9      | 8/9      | 9/9                            | 9/9     | 9/9     | 8/9     | 4/4      | 4/4      | 4/4                                                   | 4/4     | 4/4     | 4/4     | 4/4      | 4/4      |
| 3/6 samples                                                                                         | 5/5        | 5/5     | 5/5     | 4/5     | 1/5      | 1/5      | 2/2                            | 2/2     | 5/5     | 4/5     | 1/1      | 1/1      | 1/1                                                   | 1/1     | 1/1     | 1/1     | 1/1      | 1/1      |
| 4/6 samples                                                                                         | 0          | 0       | 0       | 0       | 0        | 0        | 0                              | 0       | 0       | 0       | 0        | 0        | 0                                                     | 0       | 0       | 0       | 0        | 0        |
| >1 sample                                                                                           | 14/14      | 14/14   | 14/14   | 12/14   | 8/14     | 9/14     | 11/11                          | 11/11   | 14/14   | 12/14   | 5/5      | 5/5      | 5/5                                                   | 5/5     | 5/5     | 5/5     | 5/5      | 5/5      |
| Positions with CR                                                                                   | 0          | 0       | 0       | 2       | 1        | 3        | 0                              | 0       | 0       | 2       | 0        | 0        | 0                                                     | 0       | 0       | 0       | 0        | 0        |
| True results                                                                                        | 30         | 30      | 30      | 30      | 30       | 30       | 26                             | 26      | 30      | 30      | 11       | 11       | 11                                                    | 11      | 11      | 11      | 11       | 11       |
| False and NA results                                                                                | 0          | 0       | 0       | 0       | 0        | 0        | 0                              | 0       | 0       | 0       | 0        | 0        | 0                                                     | 0       | 0       | 0       | 0        | 0        |
| Untranslated regions (UTR)                                                                          |            |         |         |         |          |          |                                |         |         |         |          |          |                                                       |         |         |         |          |          |
|                                                                                                     | Total SNVs |         |         |         |          |          | SNVs in designed target region |         |         |         |          |          | SNVs in designed target region of all three platforms |         |         |         |          |          |
| Heterozygous                                                                                        | AG (V1)    | AG (V2) | NG (V1) | NG (V3) | ILL (V1) | ILL (V4) | AG (V1)                        | AG (V2) | NG (V1) | NG (V3) | ILL (V1) | ILL (V4) | AG (V1)                                               | AG (V2) | NG (V1) | NG (V3) | ILL (V1) | ILL (V4) |
| 1/6 samples                                                                                         | 2/3        | 2/3     | 2/2     | 2/3     | 3/3      | 2/3      | 2/2                            | 2/2     | 2/2     | 2/3     | 3/3      | 2/3      | 2/2                                                   | 2/2     | 2/2     | 2/2     | 2/2      | 1/2      |
| 2/6 samples                                                                                         | 2/2        | 2/2     | 2/2     | 2/2     | 2/2      | 2/2      | 2/2                            | 2/2     | 2/2     | 2/2     | 2/2      | 2/2      | 2/2                                                   | 2/2     | 2/2     | 2/2     | 2/2      | 2/2      |
| 3/6 samples                                                                                         | 0          | 0       | 0       | 0       | 0        | 0        | 0                              | 0       | 0       | 0       | 0        | 0        | 0                                                     | 0       | 0       | 0       | 0        | 0        |
| 4/6 samples                                                                                         | 0          | 0       | 0       | 0       | 0        | 0        | 0                              | 0       | 0       | 0       | 0        | 0        | 0                                                     | 0       | 0       | 0       | 0        | 0        |
| >1 sample                                                                                           | 2/2        | 2/2     | 2/2     | 2/2     | 2/2      | 2/2      | 2/2                            | 2/2     | 2/2     | 2/2     | 2/2      | 2/2      | 2/2                                                   | 2/2     | 2/2     | 2/2     | 2/2      | 2/2      |
| Positions with CR                                                                                   | 0          | 0       | 0       | 0       | 0        | 0        | 0                              | 0       | 0       | 0       | 0        | 0        | 0                                                     | 0       | 0       | 0       | 0        | 0        |
| True results                                                                                        | 5          | 5       | 4       | 5       | 5        | 5        | 4                              | 4       | 4       | 5       | 5        | 5        | 4                                                     | 4       | 4       | 4       | 4        | 4        |
| False and NA results                                                                                | 0          | 0       | 1       | 0       | 0        | 0        | 0                              | 0       | 1       | 0       | 0        | 0        | 0                                                     | 0       | 0       | 0       | 0        | 0        |

SNV: single nucleotide variant; AG: Agilent; NG: NimbleGen; ILL: Illumina; CR: conflicting results, indicating number of heterozygous variants with  $\geq 20$  reads in at least one sample, for which in other sample(s) this read depth was not reached; NA: not applicable (here: zero reads).

**Table S18.** Heterozygous SNVs identified by Sanger sequencing but not detected by at least one of the three WES platforms. SNVs are specified by gene, gDNA position, number of samples, enrichment platform (vendor) with false result, and read depth. In the right half of the table, true results at the same positions obtained in remaining data sets for the same sample(s) are presented.

| Gene   | DNA position      | Within ROI | No. of samples | Platform  | Design   | Result (no. of results/no. of samples) | Change | NOR (sample)                        | Platform | Design    | Result (no. of results/no. of samples) | NOR (sample)                             | Other info                                      |
|--------|-------------------|------------|----------------|-----------|----------|----------------------------------------|--------|-------------------------------------|----------|-----------|----------------------------------------|------------------------------------------|-------------------------------------------------|
| COL3A1 | Chr2:189857993T>C | no         | 2              | ILL (V4)  | flanking | false positive (2/2)                   | P-->PH | 1 (2905), 2 (7344)                  | AG (V2)  | flanking  | true (2/2)                             | 16 (2905), 28 (7344)                     | OK with V1; AG (V2 and V1); CR (2905)           |
|        | Chr2:189860630A>C | no         | 1              | ILL (V4)  | ---      | NA (1/1)                               | P-->NA | 0 (2905)                            | NG (V3)  | flanking  | true (2/2)                             | 67 (2905), 56 (7344)                     | OK with V1; AG (V1) NOR<20                      |
|        | Chr2:189862352G>A | no         | 1              | ILL (V4)  | flanking | NA (1/1)                               | P-->NA | 0 (2905)                            | AG (V2)  | flanking  | true (1/1)                             | 20 (2905)                                | OK with V1; ILL (V1) NOR<20                     |
|        | Chr2:189862890G>A | no         | 1              | ILL (V4)  | ---      | NA (1/1)                               | P-->NA | 0 (2905)                            | AG (V2)  | in design | true (1/1)                             | 20 (2905)                                | OK with V1; ILL (V1) NOR<20                     |
|        | Chr2:189867882C>T | no         | 1              | ILL (V4)  | flanking | false positive (1/1)                   | P-->PH | 1 (7344)                            | NG (V3)  | flanking  | true (1/1)                             | 33 (2905)                                | OK with V1; ILL (V1) NOR<20                     |
|        | Chr2:189871573A>G | no         | 1              | ILL (V4)  | flanking | false negative (1/1)                   | P-->WT | 1 (2905)                            | AG (V2)  | flanking  | true (1/1)                             | 33 (2905)                                | OK with V1; AG (V1) and ILL (V1) NOR<20         |
|        | Chr2:189875237T>G | no         | 1              | ILL (V4)  | ---      | NA (1/1)                               | P-->NA | 0 (2905)                            | NG (V3)  | in design | true (1/1)                             | 45 (2905)                                | OK with V1; AG (V1) NOR<20                      |
| FBN1   | Chr15:48903126A>G | no         | 4              | ILL (V4)  | ---      | NA (4/4)                               | P-->NA | 0 (44), 0 (280), 0 (7344), 0 (7739) | AG (V2)  | in design | true (4/4)                             | 113 (44), 96 (280), 80 (7344), 78 (7739) | OK with V1; ILL NOR<20; NG (V3); CR             |
|        | Chr15:48813107G>T | no         | 2              | ILL (V4)  | flanking | NA (1/2)                               | P-->NA | 0 (2905)                            | AG (V2)  | flanking  | true (2/2)                             | 48 (2905), 31 (7344)                     | OK with V1; ILL (V1) NOR<20; NG (V1 and V3); CR |
|        | Chr15:48797424C>A | no         | 2              | ILL (V4)  | flanking | false positive (1/2)                   | P-->PH | 3 (7344)                            | ILL (V4) | flanking  | true (1/2)                             | 2 (7344)                                 | OK with V1; AG (V1); CR; ILL (V1) NOR<20        |
|        | Chr15:48797124T>A | no         | 2              | ILL (V4)  | flanking | NA (2/2)                               | P-->NA | 0 (44), 0 (2905)                    | AG (V2)  | flanking  | true (2/2)                             | 51 (44), 35 (2905)                       | OK with V1; ILL (V1) NOR<20                     |
|        | Chr15:48795877G>A | no         | 2              | AG (V1)   | flanking | NA (1/2)                               | P-->NA | 0 (7344)                            | AG (V2)  | flanking  | true (2/2)                             | 40 (44), 47 (2905)                       | OK with V1; ILL (V1) NOR<20                     |
|        | Chr15:48784533G>A | no         | 1              | ILL (V4)  | ---      | NA (1/1)                               | P-->NA | 0 (7739)                            | NG (V3)  | flanking  | true (2/2)                             | 9 (2905), 8 (7344)                       | OK with V1; all NOR<20                          |
|        | Chr15:48779138G>A | no         | 2              | ILL (V4)  | ---      | NA (2/2)                               | P-->NA | 0 (44), 0 (7344)                    | AG (V2)  | flanking  | true (1/1)                             | 16 (7739)                                | OK with V1; all NOR<20                          |
|        | Chr15:48779138G>A | no         | 2              | NG (V1)   | ---      | false negative (1/2)                   | P-->WT | 4 (44)                              | AG (V2)  | flanking  | true (1/1)                             | 6 (7739)                                 | OK with V1; all NOR<20                          |
|        | Chr15:48760391G>A | no         | 2              | ILL (V4)* | flanking | false negative (1/2)                   | P-->WT | 2 (44)                              | ILL (V1) | ---       | true (1/2)                             | 10 (44), 3 (7344)                        | OK with V1; ILL (V1) NOR<20                     |
|        | Chr15:48758132A>C | no         | 4              | NG (V3)   | flanking | false positive (1/4)                   | P-->PH | 10 (7739)                           | AG (V2)  | flanking  | true (2/2)                             | 34 (2905), 37 (7344)                     | OK with V1; ILL (V1) NOR<20                     |
|        | Chr15:48736684A>T | no         | 3              | ILL (V4)  | flanking | false negative (1/3)                   | P-->WT | 11 (280)                            | AG (V2)  | flanking  | true (2/2)                             | 43 (44), 45 (280), 50 (7344), 46 (7739)  | OK with V1; ILL (V1); CR; NG (V3); also CR      |
|        | Chr15:48736684A>T | no         | 3              | ILL (V1)  | flanking | false negative (1/3)                   | P-->WT | 1 (7739)                            | ILL (V4) | flanking  | true (2/3)                             | 15 (44), 5 (280), 27 (7344)              | OK with V1; ILL (V1); CR; NG (V3); also CR      |
|        | Chr15:48736684A>T | no         | 3              | ILL (V1)  | flanking | false negative (1/3)                   | P-->WT | 1 (7739)                            | AG (V2)  | in design | true (3/3)                             | 4 (44), 3 (280), 11 (7739)               | OK with V1; ILL (V1); CR; NG (V3); also CR      |
|        | Chr15:48736684A>T | no         | 3              | ILL (V1)  | flanking | false negative (1/3)                   | P-->WT | 1 (7739)                            | AG (V2)  | in design | true (3/3)                             | 137 (280), 120 (2905), 157 (7739)        | OK with V1; ILL (V1); CR; NG (V3); also CR      |
| SMAD3  | Chr15:48736615T>C | no         | 2              | ILL (V4)  | ---      | NA (2/2)                               | P-->NA | 0 (7344), 0 (7739)                  | NG (V3)  | in design | true (2/2)                             | 104 (280), 55 (2905), 31 (7739)          | OK with V1; ILL NOR<20                          |
|        | Chr15:48729359A>T | no         | 2              | ILL (V4)  | flanking | false negative (1/2)                   | P-->WT | 6 (2905)                            | ILL (V4) | flanking  | true (2/3)                             | 7 (2905), 4 (7739)                       | OK with V1; ILL NOR<20                          |
|        | Chr15:48729359A>T | no         | 2              | ILL (V4)  | flanking | false negative (1/2)                   | P-->WT | 6 (2905)                            | AG (V1)  | in design | true (3/3)                             | 148 (280), 103 (2905), 133 (7739)        | OK with V1; ILL NOR<20                          |
|        | Chr15:48729359A>T | no         | 2              | ILL (V4)  | flanking | false negative (1/2)                   | P-->WT | 6 (2905)                            | ILL (V1) | flanking  | true (3/3)                             | 102 (280), 100 (2905), 123 (7739)        | OK with V1; ILL NOR<20                          |
|        | Chr15:48729359A>T | no         | 2              | ILL (V4)  | flanking | false negative (1/2)                   | P-->WT | 6 (2905)                            | AG (V2)  | flanking  | true (2/2)                             | 5 (280), 8 (2905)                        | OK with V1; ILL NOR<20                          |
|        | Chr15:48729359A>T | no         | 2              | ILL (V4)  | flanking | false negative (1/2)                   | P-->WT | 6 (2905)                            | AG (V2)  | flanking  | true (2/2)                             | 51 (7344), 60 (7739)                     | OK with V1; ILL NOR<20                          |
|        | Chr15:48729359A>T | no         | 2              | ILL (V4)  | flanking | false negative (1/2)                   | P-->WT | 6 (2905)                            | NG (V3)  | flanking  | true (2/2)                             | 30 (7344), 41 (7739)                     | OK with V1; ILL NOR<20                          |
|        | Chr15:48729359A>T | no         | 2              | ILL (V4)  | flanking | false negative (1/2)                   | P-->WT | 6 (2905)                            | AG (V2)  | flanking  | true (2/2)                             | 61 (2905), 96 (7344)                     | OK with V1; ILL NOR<20                          |
|        | Chr15:48729359A>T | no         | 2              | ILL (V4)  | flanking | false negative (1/2)                   | P-->WT | 6 (2905)                            | NG (V3)  | in design | true (2/2)                             | 53 (2905), 75 (7344)                     | OK with V1; ILL NOR<20                          |
|        | Chr15:48729359A>T | no         | 2              | ILL (V4)  | flanking | false negative (1/2)                   | P-->WT | 6 (2905)                            | ILL (V4) | flanking  | true (1/2)                             | 5 (7344)                                 | OK with V1; ILL NOR<20                          |
| TGFBF1 | Chr9:101907279A>G | no         | 1              | ILL (V4)  | ---      | NA (1/1)                               | P-->NA | 0 (44)                              | AG (V2)  | ---       | true (1/1)                             | 13 (44)                                  | OK with V1; ILL NOR<20                          |
|        | Chr9:101907279A>G | no         | 1              | ILL (V1)  | ---      | NA (1/1)                               | P-->NA | 0 (44)                              | NG (V3)  | flanking  | true (1/1)                             | 15 (44)                                  | OK with V1; ILL NOR<20                          |
|        | Chr9:101911321A>G | no         | 1              | AG (V2)   | ---      | false positive (1/1)                   | P-->PH | 9 (44)                              | AG (V1)  | ---       | true (1/1)                             | 10 (44)                                  | OK with V1; ILL NOR<20                          |
|        | Chr9:101911321A>G | no         | 1              | ILL (V4)  | ---      | NA (1/1)                               | P-->NA | 0 (44)                              | NG (V1)  | flanking  | true (1/1)                             | 34 (44)                                  | OK with V1; ILL NOR<20                          |

\*In Supplementary Table S17 counted only once (i.e., one false result) due to same platform and vendor; NOR: Number of reads; AG: Agilent; NG: NimbleGen; ILL: Illumina; flanking: within 100 bp of design; OK, heterozygous position detected; CR: conflicting results, indicating number of heterozygous variants with ≥20 reads in at least one sample, for which in other sample(s) this read depth was not reached; design: designed target region; WT: wild-type; P: heterozygous SNV; PH: homozygous SNV; NA: not applicable (here: zero reads).

**Table S19.** False positive VCF calls in our ROI and UTR. Variants called heterozygous by WES, but wild-type in Sanger sequencing.

| Sample | Gene          | Chromosome | gDNA position | cDNA position | Location  | WT allele | Mutant allele | Change | Platform | Vendor |
|--------|---------------|------------|---------------|---------------|-----------|-----------|---------------|--------|----------|--------|
| 44     | <i>FBN1</i>   | 15         | 48'760'120    | c.4747+15     | intron 37 | A (7)     | T (2)         | WT → P | Illumina | V4     |
| 7739   | <i>FBN1</i>   | 15         | 48'718'056    | c.7210        | exon 58   | C (16)    | A (2)         | WT → P | Illumina | V4     |
| 7739   | <i>TGFBR2</i> | 3          | 30'648'342    | c.-34         | 5'UTR     | G (5)     | T (2)         | WT → P | Illumina | V4     |

WT: wild-type; P: heterozygous SNV; calls in unfiltered VCF provided by vendors (cf. Supplementary Table S3).



**Table S20.** Heterozygous indels in our gene panel detected by Sanger sequencing in the six DNA samples of this study. The values are given as called by the Integrative Genomics Viewer (IGV): mean read depth across the variant (excluding reads carrying a deletion)/reads carrying the variant. Analysis was performed using unfiltered VCF files provided by vendors (cf. Supplementary Table S3).

| Sample                                                  | Gene          | Heterozygous indels detected by Sanger | Agilent_V1                      | NimbleGen_V1                    | Illumina_V1                     | Agilent_V2                 | NimbleGen_V3               | Illumina_V4               |
|---------------------------------------------------------|---------------|----------------------------------------|---------------------------------|---------------------------------|---------------------------------|----------------------------|----------------------------|---------------------------|
| 44                                                      | <i>FBN1</i>   | c.3209-72_67delTCTTTA                  | <b>106/21</b> <sup>1</sup>      | <b>115/25</b> <sup>1</sup>      | <b>16/5</b> <sup>2</sup>        | <b>141/58</b> <sup>1</sup> | <i>58/0</i> <sup>1</sup>   | <b>15/4</b> <sup>1</sup>  |
|                                                         | <i>FBN1</i>   | c.3589+36_40delTTTTA                   | <b>29/6</b> <sup>2</sup>        | <i>3/3</i> <sup>2</sup>         | <b>20/8</b> <sup>2</sup>        | <b>46/10</b> <sup>1</sup>  | <i>23/0</i> <sup>2</sup>   | <b>16/4</b> <sup>2</sup>  |
|                                                         | <i>FBN1</i>   | c.3589+63_67delTTATG (homozygous)      | <i>17/5</i> <sup>2</sup>        | <i>3/2</i> <sup>2</sup>         | <i>5/1</i> <sup>2</sup>         | <i>24/5</i> <sup>1</sup>   | <i>14/0</i> <sup>2</sup>   | <i>0/1</i> <sup>2</sup>   |
|                                                         | <i>TGFBR1</i> | c.1386+90_94delTCTTT                   | <b>26/9</b> <sup>2</sup>        | <b>23/12</b> <sup>2</sup>       | <i>1/1</i> <sup>2</sup>         | <b>34/20</b> <sup>1</sup>  | <b>16/15</b> <sup>1</sup>  | <i>NA</i> <sup>2</sup>    |
| 280                                                     | <i>FBN1</i>   | c.3209-72_67delTCTTTA                  | <b>106/26</b> <sup>1</sup>      | <b>57/21</b> <sup>1</sup>       | <i>12/3</i> <sup>2</sup>        | <b>110/58</b> <sup>1</sup> | <i>99/0</i> <sup>1</sup>   | <i>20/2</i> <sup>1</sup>  |
|                                                         | <i>FBN1</i>   | c.3589+63_67delTTATG                   | <i>33/3</i> <sup>2</sup>        | <i>2/0</i> <sup>2</sup>         | <i>15/2</i> <sup>2</sup>        | <i>23/20</i> <sup>1</sup>  | <i>40/1</i> <sup>2</sup>   | <i>4/1</i> <sup>2</sup>   |
|                                                         | <i>FBN1</i>   | c.5924_5925dupAT (p.E1976MfsX5)*       | <b>85/28</b> <sup>1</sup>       | <b>86/29</b> <sup>1</sup>       | <b>24/11</b> <sup>1</sup>       | <b>93/55</b> <sup>1</sup>  | <b>107/31</b> <sup>1</sup> | <b>20/5</b> <sup>1</sup>  |
| 326                                                     | <i>FBN1</i>   | c.1904_1919del (p.Y635SfsX78)*         | <b>37/7</b> <sup>2</sup>        | <b>95/12</b> <sup>2</sup>       | <i>37/3</i> <sup>2</sup>        | <b>55/30</b> <sup>1</sup>  | <i>60/0</i> <sup>1</sup>   | <b>33/6</b> <sup>1</sup>  |
| 2905                                                    | <i>COL3A1</i> | c.2391+28delC                          | <b>13/14</b> <sup>2</sup>       | <b>96/54</b> <sup>1</sup>       | <b>24/15</b> <sup>2</sup>       | <b>30/13</b> <sup>1</sup>  | <b>58/32</b> <sup>1</sup>  | <b>16/14</b> <sup>1</sup> |
|                                                         | <i>FBN1</i>   | c.3589+36_40delTTTTA                   | <b>27/11</b> <sup>2</sup>       | <i>7/1</i> <sup>2</sup>         | <b>21/5</b> <sup>2</sup>        | <b>26/11</b> <sup>1</sup>  | <i>33/0</i> <sup>2</sup>   | <b>28/5</b> <sup>2</sup>  |
|                                                         | <i>FBN1</i>   | c.3589+63_67delTTATG                   | <i>18/3</i> <sup>2</sup>        | <i>3/1</i> <sup>2</sup>         | <i>9/1</i> <sup>2</sup>         | <i>20/3</i> <sup>1</sup>   | <i>19/0</i> <sup>2</sup>   | <i>4/0</i> <sup>2</sup>   |
|                                                         | <i>FBN1</i>   | c.5066-14dupT**                        | <b>119/42</b> <sup>2</sup>      | <b>120/57</b> <sup>1</sup>      | <b>19/5</b> <sup>2</sup>        | <b>166/74</b> <sup>1</sup> | <b>67/19</b> <sup>1</sup>  | <b>30/9</b> <sup>2</sup>  |
|                                                         | <i>FBN1</i>   | c.5423-30_28delCCT**                   | <b>25/12</b> <sup>2</sup>       | <b>24/11</b> <sup>1</sup>       | <b>59/26</b> <sup>2</sup>       | <b>23/24</b> <sup>1</sup>  | <b>29/17</b> <sup>1</sup>  | <b>43/15</b> <sup>1</sup> |
|                                                         | <i>FBN1</i>   | c.5671+28dupT                          | <b>67/24</b> <sup>2</sup>       | <b>26/12</b> <sup>1</sup>       | <b>21/11</b> <sup>2</sup>       | <b>67/28</b> <sup>1</sup>  | <b>34/20</b> <sup>1</sup>  | <b>12/4</b> <sup>2</sup>  |
| 7344                                                    | <i>FBN1</i>   | c.3209-72_67delTCTTTA                  | <b>123/28</b> <sup>1</sup>      | <b>85/25</b> <sup>1</sup>       | <b>13/6</b> <sup>2</sup>        | <b>136/58</b> <sup>1</sup> | <i>69/0</i> <sup>1</sup>   | <b>19/7</b> <sup>1</sup>  |
|                                                         | <i>FBN1</i>   | c.3589+36_40delTTTTA                   | <b>26/9</b> <sup>2</sup>        | <b>7/7</b> <sup>2</sup>         | <i>17/0</i> <sup>2</sup>        | <b>30/17</b> <sup>1</sup>  | <i>41/0</i> <sup>2</sup>   | <i>15/1</i> <sup>2</sup>  |
|                                                         | <i>FBN1</i>   | c.3589+63_67delTTATG (homozygous)      | <i>15/2</i> <sup>2</sup>        | <i>5/1</i> <sup>2</sup>         | <i>6/3</i> <sup>2</sup>         | <i>21/1</i> <sup>1</sup>   | <i>22/0</i> <sup>2</sup>   | <i>2/4</i> <sup>2</sup>   |
|                                                         | <i>FBN1</i>   | c.5066-14dupT**                        | <b>150/60</b> <sup>2</sup>      | <b>98/37</b> <sup>1</sup>       | <i>18/1</i> <sup>2</sup>        | <b>165/63</b> <sup>1</sup> | <b>93/25</b> <sup>1</sup>  | <b>36/16</b> <sup>2</sup> |
|                                                         | <i>FBN1</i>   | c.5423-30_28delCCT**                   | <b>33/21</b> <sup>2</sup>       | <b>16/14</b> <sup>1</sup>       | <b>46/25</b> <sup>2</sup>       | <b>39/32</b> <sup>1</sup>  | <b>21/31</b> <sup>1</sup>  | <b>37/14</b> <sup>1</sup> |
|                                                         | <i>FBN1</i>   | c.5671+28dupT                          | <b>88/35</b> <sup>2</sup>       | <b>20/5</b> <sup>2</sup>        | <b>14/6</b> <sup>2</sup>        | <b>88/40</b> <sup>1</sup>  | <b>38/17</b> <sup>1</sup>  | <b>13/9</b> <sup>2</sup>  |
|                                                         | <i>TGFBR1</i> | c.70_78del (p.A24_A26del)*             | <i>1/0</i> <sup>2</sup>         | <i>NA</i> <sup>2</sup>          | <i>NA</i> <sup>2</sup>          | <i>5/0</i> <sup>2</sup>    | <i>4/0</i> <sup>2</sup>    | <i>NA</i> <sup>2</sup>    |
| 7739                                                    | <i>FBN1</i>   | c.3589+63_67delTTATG                   | <i>14/1</i> <sup>2</sup>        | <i>1/0</i> <sup>2</sup>         | <i>7/0</i> <sup>2</sup>         | <b>9/4</b> <sup>1</sup>    | <i>9/0</i> <sup>2</sup>    | <i>3/3</i> <sup>2</sup>   |
| Summary IGV total (unambiguous calls/total indels)      |               |                                        | 16/22                           | 14/22                           | 11/22                           | 18/22                      | 9/22                       | 13/22                     |
| Summary VCF total (reported in VCF/total indels)        |               |                                        | <i>4/22</i> <sup>***</sup>      | <i>10/22</i> <sup>***</sup>     | <i>1/22</i> <sup>***</sup>      | 21/22                      | 13/22                      | 8/22                      |
| <b>Summary IGV ROI (unambiguous calls/total indels)</b> |               |                                        | <b>6/7</b>                      | <b>6/7</b>                      | <b>4/7</b>                      | <b>6/7</b>                 | <b>5/7</b>                 | <b>6/7</b>                |
| <b>Summary VCF ROI (reported in VCF/total indels)</b>   |               |                                        | <b><i>1/7</i><sup>***</sup></b> | <b><i>5/7</i><sup>***</sup></b> | <b><i>1/7</i><sup>***</sup></b> | <b>6/7</b>                 | <b>6/7</b>                 | <b>4/7</b>                |

\*exonic; \*\*in our region of interest (ROI); \*\*\*note that in the VCF files of V1 only variants in designed target region are called (cf. Supplementary Table S3); NA: not applicable (here: zero reads); bold: unambiguous calls (>4 reads carrying indel reported by IGV); italic: in designed target region; unmarked: in region flanking to designed target region (within ±100 bp); underlined: outside the flanking region; <sup>1</sup>variant called in VCF; <sup>2</sup>variant not called in VCF.

**Table S21.** Genomic regions (182 exons) with copy numbers known from array CGH (highlighted in Supplementary Figure S26).

| Chr | Start       | End         | Length [bp] | Exons | 44      | 280     | 326* | 2905    | 7344    | 7739    |
|-----|-------------|-------------|-------------|-------|---------|---------|------|---------|---------|---------|
| 1   | 206'315'856 | 206'407'396 | 91'541      | 9     | wt      | wt      | wt   | het del | wt      | wt      |
| 4   | 69'373'934  | 69'491'021  | 117'088     | 6     | het del | het del | wt   | wt      | wt      | het del |
| 8   | 15'950'680  | 16'023'855  | 73'176      | 7     | het del | wt      | wt   | wt      | wt      | wt      |
| 8   | 39'232'101  | 39'387'546  | 155'446     | 30    | wt      | het del | wt   | het del | het del | hom del |
| 10  | 47'585'204  | 47'703'746  | 118'543     | 17    | dup     | wt      | wt   | wt      | wt      | wt      |
| 11  | 55'364'154  | 55'432'019  | 67'866      | 3     | wt      | wt      | wt   | wt      | het del | wt      |
| 11  | 98'964'932  | 100'557'616 | 1'592'685   | 25    | wt      | wt      | wt   | wt      | het del | wt      |
| 14  | 73'994'506  | 74'025'405  | 30'900      | 3     | wt      | hom del | wt   | het del | hom del | het del |
| 15  | 48'910'861  | 48'940'773  | 29'913      | 2     | het del | wt      | wt   | wt      | wt      | wt      |
| 19  | 6'889'723   | 7'017'490   | 127'768     | 39    | wt      | wt      | wt   | wt      | wt      | dup     |
| 22  | 25'630'803  | 25'911'781  | 280'979     | 16    | het del | wt      | wt   | wt      | wt      | wt      |
| 22  | 42'897'410  | 42'955'581  | 58'172      | 25    | wt      | dup     | wt   | wt      | wt      | dup     |

\* This sample was used as control for the relative base count quantification in WES data; wt, wild-type; het del, heterozygous deletion; hom del, homozygous deletion; dup, duplication.

**Table S22.** Total raw read counts reported by the four vendors (V1-V4).

| Sample      | Agilent            |                    | NimbleGen          |                    | Illumina           |                   |
|-------------|--------------------|--------------------|--------------------|--------------------|--------------------|-------------------|
|             | V1                 | V2                 | V1                 | V3                 | V1                 | V4                |
| 44          | 154'666'636        | 188'901'528        | 223'738'732        | 164'277'220        | 106'883'310        | 68'141'762        |
| 280         | 219'518'670        | 173'953'326        | 159'813'888        | 199'864'124        | 115'773'968        | 57'109'004        |
| 326         | 137'556'636        | 173'729'966        | 154'276'308        | 142'064'946        | 95'556'070         | 71'901'946        |
| 2905        | 130'559'938        | 144'762'290        | 178'017'756        | 149'900'120        | 133'200'476        | 72'876'912        |
| 7344        | 172'323'066        | 172'157'056        | 167'946'762        | 195'763'608        | 122'058'350        | 70'667'504        |
| 7739        | 151'440'766        | 178'561'090        | 190'473'376        | 99'625'288         | 89'940'532         | 62'495'098        |
| <b>Mean</b> | <b>161'010'952</b> | <b>172'010'876</b> | <b>179'044'470</b> | <b>158'582'551</b> | <b>110'568'784</b> | <b>67'198'704</b> |

**Table S23.** Proportion of duplicates reported by the four vendors (V1-V4).

| Sample      | Agilent      |             | NimbleGen    |             | Illumina     |              |
|-------------|--------------|-------------|--------------|-------------|--------------|--------------|
|             | V1           | V2          | V1           | V3          | V1           | V4           |
| 44          | 26.3%        | 8.0%        | 10.7%        | 50%*        | 12.3%        | 12.4%        |
| 280         | 43.9%        | 6.6%        | 12.5%        | 10%*        | 12.4%        | 11.1%        |
| 326         | 34.7%        | 8.2%        | 14.0%        | 50%*        | 11.6%        | 11.9%        |
| 2905        | 24.0%        | 9.5%        | 8.8%         | 30%*        | 13.2%        | 12.4%        |
| 7344        | 20.2%        | 8.2%        | 8.7%         | 30%*        | 12.2%        | 11.9%        |
| 7739        | 19.4%        | 10.0%       | 9.5%         | 50%*        | 11.7%        | 11.9%        |
| <b>Mean</b> | <b>28.1%</b> | <b>8.4%</b> | <b>10.7%</b> | <b>37%*</b> | <b>12.2%</b> | <b>11.9%</b> |

\*Number is estimated from provided graphs.

**Table S24.** Total mapped and deduplicated read counts (% of raw reads).

| Sample      | Agilent                    |                            | NimbleGen                  |                           | Illumina                  |                          |
|-------------|----------------------------|----------------------------|----------------------------|---------------------------|---------------------------|--------------------------|
|             | V1                         | V2                         | V1                         | V3*                       | V1                        | V4*                      |
| 44          | 110'584'430 (71.5%)        | 172'118'729 (91.1%)        | 186'538'676 (83.4%)        | 72'899'287 (44.4%)        | 88'290'788 (85.5%)        | 53'245'236 (78.1%)       |
| 280         | 119'682'978 (54.5%)        | 160'900'330 (92.5%)        | 129'934'094 (81.3%)        | 158'324'581 (79.2%)       | 95'545'396 (85.1%)        | 45'562'196 (79.8%)       |
| 326         | 87'403'593 (63.5%)         | 157'585'695 (90.7%)        | 122'855'749 (79.6%)        | 61'382'269 (43.2%)        | 79'962'090 (87.1%)        | 56'364'527 (78.4%)       |
| 2905        | 96'387'713 (73.8%)         | 129'503'393 (89.5%)        | 151'654'787 (85.2%)        | 90'817'153 (60.6%)        | 109'038'759 (84.8%)       | 57'138'610 (78.4%)       |
| 7344        | 133'734'129 (77.6%)        | 156'320'331 (90.8%)        | 143'047'403 (85.2%)        | 121'277'235 (62.0%)       | 101'342'654 (85.7%)       | 55'996'771 (79.2%)       |
| 7739        | 118'295'260 (78.1%)        | 156'695'689 (87.8%)        | 159'150'546 (83.6%)        | 41'985'030 (42.1%)        | 72'695'510 (87.0%)        | 47'498'550 (76.0%)       |
| <b>Mean</b> | <b>111'014'684 (69.9%)</b> | <b>155'520'695 (90.4%)</b> | <b>148'863'543 (83.0%)</b> | <b>91'114'259 (55.2%)</b> | <b>91'145'866 (85.7%)</b> | <b>52'34'315 (78.3%)</b> |

\*Only unique reads (cf. Supplementary Table S3).

**Table S25.** Enrichment and detection of non-reference (alternative) alleles in VCF files provided by vendors (V1-V4). Fraction (%) of non-reference (alternative) alleles for shared sequence variants targeted by each platform and located within RefSeq coding exons completely (100%) covered with  $\geq 20$  reads by all six platform-vendor combinations. Analysis was performed using filtered and recalibrated (V1), filtered only (V2) or unfiltered VCF files (V3 and V4) provided by vendor V1 using the same data analysis workflow for all three platforms ensuring best comparability and vendors V2-V4 with different data analysis settings as specified in Supplementary Table S3.

| <b>SNVs and indels</b>               | <b>44</b>  | <b>280</b> | <b>326</b>  | <b>2905</b> | <b>7344</b> | <b>7739</b> | <b>Total</b>      |
|--------------------------------------|------------|------------|-------------|-------------|-------------|-------------|-------------------|
| Number of variants                   | 2'631      | 1'856      | 2'079       | 2'837       | 2'915       | 1'421       | <b>13'739</b>     |
| Number of heterozygous variants      | 1'707      | 1'196      | 1'294       | 1'812       | 1'772       | 957         | <b>8'738</b>      |
| Agilent_V1 alternative allele [%]    | 47.98±0.31 | 47.89±0.33 | 48.08±0.38  | 47.96±0.32  | 48.10±0.28  | 47.97±0.38  | <b>47.40±0.14</b> |
| Agilent_V2 alternative allele [%]*   | 48.41±0.25 | 48.28±0.31 | 48.23±0.29  | 48.34±0.29  | 48.36±0.26  | 48.18±0.35  | <b>47.60±0.12</b> |
| NimbleGen_V1 alternative allele [%]  | 46.12±0.32 | 46.31±0.40 | 45.90±0.41  | 46.55±0.31  | 46.66±0.33  | 46.57±0.42  | <b>47.64±0.15</b> |
| NimbleGen_V3 alternative allele [%]* | 48.07±0.39 | 48.01±0.33 | 48.11±0.47  | 47.90±0.34  | 48.01±0.30  | 47.96±0.65  | <b>47.77±0.16</b> |
| Illumina_V1 alternative allele [%]   | 47.90±0.37 | 47.66±0.46 | 48.59±0.45  | 47.92±0.35  | 48.00±0.36  | 48.54±0.54  | <b>46.86±0.17</b> |
| Illumina_V4 alternative allele [%]*  | 46.28±0.44 | 45.56±0.60 | 45.86±0.51  | 45.99±0.42  | 46.32±0.41  | 45.80±0.58  | <b>46.32±0.19</b> |
| <b>SNVs</b>                          | <b>44</b>  | <b>280</b> | <b>326</b>  | <b>2905</b> | <b>7344</b> | <b>7739</b> | <b>Total</b>      |
| Number of variants                   | 2'606      | 1'836      | 2'058       | 2'801       | 2'876       | 1'402       | <b>13'579</b>     |
| Number of heterozygous variants      | 1'697      | 1'188      | 1'289       | 1'801       | 1'761       | 951         | <b>8'687</b>      |
| Agilent_V1 alternative allele [%]    | 47.99±0.31 | 47.92±0.33 | 48.10±0.38  | 47.97±0.32  | 48.11±0.28  | 48.00±0.38  | <b>47.42±0.14</b> |
| Agilent_V2 alternative allele [%]*   | 48.43±0.25 | 48.30±0.31 | 48.27±0.28  | 48.35±0.29  | 48.38±0.26  | 48.18±0.35  | <b>47.62±0.12</b> |
| NimbleGen_V1 alternative allele [%]  | 46.16±0.32 | 46.38±0.40 | 45.96±0.41  | 46.56±0.31  | 46.73±0.33  | 46.56±0.42  | <b>47.68±0.15</b> |
| NimbleGen_V3 alternative allele [%]* | 48.07±0.39 | 48.02±0.33 | 48.12±0.47  | 47.91±0.34  | 48.02±0.30  | 47.97±0.66  | <b>47.78±0.16</b> |
| Illumina_V1 alternative allele [%]   | 47.93±0.37 | 47.73±0.47 | 48.65±0.45  | 47.95±0.35  | 48.02±0.36  | 48.56±0.54  | <b>46.94±0.17</b> |
| Illumina_V4 alternative allele [%]*  | 46.29±0.44 | 45.60±0.60 | 45.88±0.51  | 45.99±0.42  | 46.34±0.41  | 45.77±0.58  | <b>46.37±0.20</b> |
| <b>Indels</b>                        | <b>44</b>  | <b>280</b> | <b>326</b>  | <b>2905</b> | <b>7344</b> | <b>7739</b> | <b>Total</b>      |
| Number of variants                   | 25         | 20         | 21          | 36          | 39          | 19          | <b>160</b>        |
| Number of heterozygous variants      | 10         | 8          | 5           | 11          | 11          | 6           | <b>51</b>         |
| Agilent_V1 alternative allele [%]    | 47.13±4.66 | 42.99±4.92 | 41.25±8.58  | 46.95±4.68  | 47.05±4.06  | 45.45±6.26  | <b>47.11±1.81</b> |
| Agilent_V2 alternative allele [%]*   | 44.85±3.83 | 43.95±4.55 | 36.27±6.48  | 46.62±4.19  | 45.60±3.78  | 46.99±5.83  | <b>47.20±1.58</b> |
| NimbleGen_V1 alternative allele [%]  | 40.39±4.77 | 36.63±5.88 | 32.78±9.27  | 44.21±4.53  | 35.69±4.69  | 48.87±6.99  | <b>47.00±1.95</b> |
| NimbleGen_V3 alternative allele [%]* | 48.10±5.85 | 47.70±4.83 | 44.34±10.69 | 45.20±5.02  | 47.19±4.34  | 45.69±10.82 | <b>47.55±2.19</b> |
| Illumina_V1 alternative allele [%]   | 43.13±5.51 | 38.04±6.85 | 34.65±10.14 | 43.15±5.10  | 43.57±5.17  | 44.39±8.86  | <b>45.55±2.22</b> |
| Illumina_V4 alternative allele [%]*  | 45.10±6.64 | 39.41±8.81 | 42.18±11.51 | 44.31±6.05  | 43.94±5.86  | 50.17±9.63  | <b>45.42±2.61</b> |

Indicated ranges for mean values ( $\pm$ ) represent 95% confidence intervals; \*since each vendor applied a different data analysis workflow (cf. Supplementary Table S3), the restriction to shared sequence variants targeted by the design of each platform and located within RefSeq coding exons completely covered at 20 $\times$  by all six platform-vendor combinations should largely exclude possible false-positive allele calls.

**Table S26.** Enrichment and detection of non-reference (alternative) alleles in gVCF files generated by the same in-house bioinformatics pipeline. Fraction (%) of alternative alleles for shared sequence variants within the platforms' designed target region and 50-bp flanking sequences achieving  $\geq 20$  reads and  $>30$  quality scores by all six platform-vendor combinations.

| <b>SNVs and indels</b>              | <b>44</b>  | <b>280</b> | <b>326</b> | <b>2905</b> | <b>7344</b> | <b>7739</b> | <b>Total</b>      |
|-------------------------------------|------------|------------|------------|-------------|-------------|-------------|-------------------|
| Number of variants                  | 27'818     | 21'518     | 23'758     | 28'188      | 28'347      | 21'565      | <b>151'194</b>    |
| Number of heterozygous variants     | 18'152     | 13'971     | 15'142     | 17'876      | 18'163      | 14'499      | <b>97'803</b>     |
| Agilent_V1 alternative allele [%]   | 47.33±0.12 | 47.61±0.13 | 47.45±0.14 | 47.41±0.12  | 47.40±0.11  | 47.22±0.13  | <b>47.40±0.05</b> |
| Agilent_V2 alternative allele [%]   | 47.58±0.11 | 47.69±0.12 | 47.64±0.12 | 47.58±0.12  | 47.56±0.11  | 47.55±0.13  | <b>47.60±0.05</b> |
| NimbleGen_V1 alternative allele [%] | 47.83±0.12 | 47.70±0.14 | 47.50±0.14 | 47.69±0.13  | 47.55±0.13  | 47.56±0.14  | <b>47.64±0.05</b> |
| NimbleGen_V3 alternative allele [%] | 47.88±0.13 | 47.38±0.12 | 47.94±0.15 | 47.73±0.12  | 47.76±0.11  | 47.88±0.18  | <b>47.77±0.06</b> |
| Illumina_V1 alternative allele [%]  | 46.86±0.15 | 46.93±0.16 | 46.56±0.17 | 46.97±0.14  | 47.12±0.14  | 46.64±0.18  | <b>46.86±0.06</b> |
| Illumina_V4 alternative allele [%]  | 46.53±0.16 | 46.10±0.19 | 46.04±0.18 | 46.40±0.16  | 46.50±0.16  | 46.21±0.18  | <b>46.32±0.07</b> |
| <b>SNVs</b>                         | <b>44</b>  | <b>280</b> | <b>326</b> | <b>2905</b> | <b>7344</b> | <b>7739</b> | <b>Total</b>      |
| Number of variants                  | 26'221     | 20'285     | 22'422     | 26'470      | 26'654      | 20'312      | <b>142'364</b>    |
| Number of heterozygous variants     | 17'138     | 13'163     | 14'289     | 16'793      | 17'082      | 13'693      | <b>92'158</b>     |
| Agilent_V1 alternative allele [%]   | 47.33±0.12 | 47.63±0.14 | 47.46±0.14 | 47.43±0.13  | 47.42±0.12  | 47.26±0.14  | <b>47.42±0.05</b> |
| Agilent_V2 alternative allele [%]   | 47.60±0.11 | 47.72±0.13 | 47.65±0.12 | 47.62±0.12  | 47.59±0.11  | 47.58±0.13  | <b>47.62±0.05</b> |
| NimbleGen_V1 alternative allele [%] | 47.86±0.13 | 47.73±0.15 | 47.51±0.14 | 47.74±0.13  | 47.60±0.13  | 47.63±0.14  | <b>47.68±0.06</b> |
| NimbleGen_V3 alternative allele [%] | 47.91±0.14 | 47.40±0.12 | 47.96±0.16 | 47.74±0.13  | 47.78±0.11  | 47.86±0.18  | <b>47.78±0.06</b> |
| Illumina_V1 alternative allele [%]  | 46.92±0.15 | 47.01±0.17 | 46.66±0.17 | 47.05±0.15  | 47.18±0.15  | 46.72±0.18  | <b>46.94±0.07</b> |
| Illumina_V4 alternative allele [%]  | 46.58±0.16 | 46.17±0.20 | 46.08±0.18 | 46.47±0.16  | 46.53±0.16  | 46.28±0.19  | <b>46.37±0.07</b> |
| <b>Indels</b>                       | <b>44</b>  | <b>280</b> | <b>326</b> | <b>2905</b> | <b>7344</b> | <b>7739</b> | <b>Total</b>      |
| Number of variants                  | 1'597      | 1'233      | 1'336      | 1'718       | 1'693       | 1'253       | <b>8'830</b>      |
| Number of heterozygous variants     | 1'014      | 808        | 853        | 1'083       | 1'081       | 806         | <b>5'645</b>      |
| Agilent_V1 alternative allele [%]   | 47.41±0.55 | 47.28±0.57 | 47.23±0.61 | 47.11±0.53  | 47.04±0.47  | 46.53±0.62  | <b>47.11±0.23</b> |
| Agilent_V2 alternative allele [%]   | 47.34±0.50 | 47.30±0.54 | 47.39±0.53 | 47.07±0.50  | 47.09±0.45  | 47.07±0.59  | <b>47.20±0.21</b> |
| NimbleGen_V1 alternative allele [%] | 47.86±0.55 | 47.73±0.60 | 47.51±0.59 | 47.74±0.51  | 47.60±0.51  | 47.63±0.62  | <b>47.00±0.23</b> |
| NimbleGen_V3 alternative allele [%] | 47.44±0.58 | 47.11±0.51 | 47.57±0.65 | 47.55±0.51  | 47.41±0.47  | 48.31±0.75  | <b>47.55±0.23</b> |
| Illumina_V1 alternative allele [%]  | 45.71±0.69 | 45.62±0.76 | 44.86±0.78 | 45.66±0.62  | 46.04±0.60  | 45.21±0.82  | <b>45.55±0.29</b> |
| Illumina_V4 alternative allele [%]  | 45.73±0.71 | 44.85±0.87 | 45.37±0.81 | 45.25±0.70  | 46.06±0.66  | 45.06±0.85  | <b>45.42±0.31</b> |

Variant positions with more than one different non-reference allele (non-biallelic) as well as variant calls with alternative allele percentages outside 10-90% were excluded; indicated ranges for the mean values (±) represent 95% confidence intervals.

**Table S27.** Array CGH data for three DNA samples (44, 7344, and 7739). Common coding SNVs of NimbleGen CGH/LOH array within designed target region and exons completely covered at  $\geq 20$  reads by WES performed by all platforms and vendors compared to WES variant calls (unfiltered VCF files provided by vendors, cf. Supplementary Table S3).

|                                            | <b>44</b> | <b>7344</b> | <b>7739</b> |
|--------------------------------------------|-----------|-------------|-------------|
| Total shared covered coding exons          | 65'135    | 68'992      | 39'704      |
| Total SNVs from array CGH in covered exons | 93        | 101         | 53          |
| Heterozygous SNPs                          | 44*       | 29*         | 20*         |
| Homozygous SNPs                            | 10*       | 23*         | 6*          |
| Wild-type SNPs                             | 27**      | 41**        | 13**        |
| No/false array results                     | 12        | 8           | 14          |

\*Correctly called regardless of WES platform and vendor; \*\*correctly recognised as wild-type regardless of WES platform and vendor.

**Table S28.** Assessment of influence of laboratory workflow on variant calling for the three enrichment platforms by comparing gVCF files generated by the same in-house bioinformatics pipeline using FASTQ files provided by vendors V1-V4 for all three enrichment platforms (six data sets per DNA sample) and calling genotypes for genomic positions within the platforms' designed target regions and 50-bp flanking sequences which achieved  $\geq 20$  reads and  $>30$  quality scores (cf. Supplementary Table S3). Positions with a heterozygous genotype call by at least one of the three platforms (variant positions) in common covered regions of all six platform-vendor combinations were analysed revealing differences in variant detection among the three platforms influenced by laboratory workflow (cf. results of V1 vs. results of V2-V4).

| Heterozygous sequence variant positions               | 44              | 280             | 326             | 2905            | 7344            | 7739            | Mean                       |
|-------------------------------------------------------|-----------------|-----------------|-----------------|-----------------|-----------------|-----------------|----------------------------|
| Total sequence variant positions                      | 19'051 (100%)   | 14'763 (100%)   | 15'944 (100%)   | 18'752 (100%)   | 19'068 (100%)   | 15'240 (100%)   | <b>17'136 (100%)</b>       |
| Heterozygous in all six platform-vendor combinations* | 18'152 (95.28%) | 13'971 (94.64%) | 15'142 (94.97%) | 17'876 (95.33%) | 18'163 (95.25%) | 14'499 (95.14%) | <b>16'301 (95.1±0.27%)</b> |
| No non-reference allele in Agilent V1 and V2 only**   | 24 (0.13%)      | 28 (0.19%)      | 23 (0.14%)      | 36 (0.19%)      | 20 (0.10%)      | 22 (0.14%)      | <b>26 (0.15±0.04%)</b>     |
| No non-reference allele in Agilent V1 only**          | 10 (0.05%)      | 9 (0.06%)       | 23 (0.14%)      | 10 (0.05%)      | 24 (0.13%)      | 23 (0.15%)      | <b>17 (0.10±0.05%)</b>     |
| No non-reference allele in Agilent V2 only**          | 7 (0.04%)       | 6 (0.04%)       | 4 (0.03%)       | 4 (0.02%)       | 3 (0.02%)       | 13 (0.09%)      | <b>6 (0.04±0.03%)</b>      |
| No non-reference allele in NimbleGen V1 and V3 only** | 11 (0.06%)      | 5 (0.03%)       | 9 (0.06%)       | 6 (0.03%)       | 5 (0.03%)       | 4 (0.03%)       | <b>7 (0.04±0.02%)</b>      |
| No non-reference allele in NimbleGen V1 only**        | 18 (0.09%)      | 24 (0.16%)      | 13 (0.08%)      | 16 (0.09%)      | 23 (0.12%)      | 18 (0.12%)      | <b>19 (0.11±0.03%)</b>     |
| No non-reference allele in NimbleGen V3 only**        | 16 (0.08%)      | 16 (0.11%)      | 7 (0.04%)       | 16 (0.09%)      | 9 (0.05%)       | 14 (0.09%)      | <b>13 (0.08±0.03%)</b>     |
| No non-reference allele in Illumina V1 and V4 only**  | 90 (0.47%)      | 79 (0.54%)      | 81 (0.51%)      | 93 (0.50%)      | 79 (0.41%)      | 77 (0.51%)      | <b>83 (0.49±0.04%)</b>     |
| No non-reference allele in Illumina V1 only**         | 37 (0.19%)      | 21 (0.14%)      | 31 (0.19%)      | 19 (0.10%)      | 31 (0.16%)      | 42 (0.28%)      | <b>30 (0.18±0.06%)</b>     |
| No non-reference allele in Illumina V4 only**         | 49 (0.26%)      | 68 (0.46%)      | 48 (0.30%)      | 51 (0.27%)      | 49 (0.26%)      | 42 (0.28%)      | <b>51 (0.30±0.08%)</b>     |
| Heterozygous in Agilent V1 and V2 only***             | 21 (0.11%)      | 20 (0.14%)      | 20 (0.13%)      | 24 (0.13%)      | 34 (0.18%)      | 21 (0.14%)      | <b>23 (0.14±0.02%)</b>     |
| Heterozygous in Agilent V1 only***                    | 24 (0.13%)      | 27 (0.18%)      | 16 (0.10%)      | 28 (0.15%)      | 21 (0.11%)      | 23 (0.15%)      | <b>23 (0.14±0.03%)</b>     |
| Heterozygous in Agilent V2 only***                    | 59 (0.31%)      | 39 (0.26%)      | 47 (0.29%)      | 48 (0.26%)      | 60 (0.31%)      | 23 (0.15%)      | <b>46 (0.27±0.06%)</b>     |
| Heterozygous in NimbleGen V1 and V3 only***           | 45 (0.24%)      | 16 (0.11%)      | 38 (0.24%)      | 17 (0.09%)      | 32 (0.17%)      | 20 (0.13%)      | <b>28 (0.16±0.07%)</b>     |
| Heterozygous in NimbleGen V1 only***                  | 77 (0.40%)      | 75 (0.51%)      | 65 (0.41%)      | 57 (0.30%)      | 66 (0.35%)      | 64 (0.42%)      | <b>67 (0.40±0.07%)</b>     |
| Heterozygous in NimbleGen V3 only***                  | 142 (0.75%)     | 96 (0.65%)      | 111 (0.70%)     | 140 (0.75%)     | 155 (0.81%)     | 112 (0.73%)     | <b>126 (0.73±0.06%)</b>    |
| Heterozygous in Illumina V1 and V4 only***            | 21 (0.11%)      | 31 (0.21%)      | 39 (0.24%)      | 29 (0.15%)      | 23 (0.12%)      | 19 (0.12%)      | <b>27 (0.16±0.06%)</b>     |
| Heterozygous in Illumina V1 only***                   | 54 (0.28%)      | 43 (0.29%)      | 53 (0.33%)      | 48 (0.26%)      | 54 (0.28%)      | 36 (0.24%)      | <b>48 (0.28±0.03%)</b>     |
| Heterozygous in Illumina V4 only***                   | 51 (0.27%)      | 46 (0.31%)      | 32 (0.20%)      | 43 (0.23%)      | 49 (0.26%)      | 34 (0.22%)      | <b>43 (0.25±0.04%)</b>     |
| Further observed genotypes****                        | 143 (0.75%)     | 143 (0.97%)     | 142 (0.89%)     | 191 (1.02%)     | 168 (0.88%)     | 134 (0.88%)     | <b>154 (0.90±0.10%)</b>    |

Variant positions with more than one different alternative allele (non-biallelic) or heterozygous calls at non-reference allele fractions outside the range of 10-90% were excluded from analysis; values in parentheses indicate fraction of total analysed variant positions and ranges for the mean values ( $\pm$ ) represent 95% confidence intervals; \*to be considered as true positive calls (note that alignment errors cannot be excluded); \*\*may harbour false negative calls (remaining platform-vendor combinations have heterozygous calls); \*\*\*may harbour false positive calls (remaining platform-vendor combinations called no non-reference allele); \*\*\*\*rare patterns of different calls among platform-vendor combinations not listed in this table, including also potentially homozygous positions.

**Table S29.** Intervals within which 95% of the relative base counts of 21'769 RefSeq exons (covered at 20× in all 36 platform-vendor-sample combinations) used for normalisation in Supplementary Figure S24 lie (calculated according to the Student's *t* distribution as the mean of *n* values ± critical *t* value ( $t_{crit,n-1}$ ) × *SD* using *n* = 21'769 and 108'845 for individual and the total of five samples, respectively,  $t_{crit} = 1.960$ ). The number of dots with relative base counts >3 and thus not shown in Supplementary Figure S24 is given in parentheses.

|                     | <b>44</b>     | <b>280</b>    | <b>326*</b>   | <b>2905</b>   | <b>7344</b>   | <b>7739</b>   | <b>Total**</b>        |
|---------------------|---------------|---------------|---------------|---------------|---------------|---------------|-----------------------|
| <b>Agilent_V1</b>   | 1.01±0.34 (1) | 1.01±0.32 (0) | 1.00±0.00 (0) | 1.01±0.34 (1) | 1.01±0.32 (0) | 1.01±0.33 (0) | <b>1.01±0.33 (2)</b>  |
| <b>Agilent_V2</b>   | 1.00±0.28 (1) | 1.01±0.28 (0) | 1.00±0.00 (0) | 1.01±0.29 (1) | 1.01±0.28 (0) | 1.01±0.28 (0) | <b>1.01±0.28 (2)</b>  |
| <b>NimbleGen_V1</b> | 1.00±0.37 (2) | 1.00±0.41 (2) | 1.00±0.00 (0) | 1.00±0.37 (2) | 1.00±0.38 (2) | 1.00±0.43 (2) | <b>1.00±0.39 (10)</b> |
| <b>NimbleGen_V3</b> | 1.02±0.41 (1) | 0.99±0.46 (2) | 1.00±0.00 (0) | 1.01±0.41 (1) | 1.01±0.38 (0) | 1.03±0.43 (0) | <b>1.01±0.42 (4)</b>  |
| <b>Illumina_V1</b>  | 1.00±0.41 (1) | 1.00±0.44 (0) | 1.00±0.00 (0) | 1.00±0.43 (1) | 1.00±0.46 (0) | 1.01±0.38 (0) | <b>1.00±0.42 (2)</b>  |
| <b>Illumina_V4</b>  | 1.02±0.42 (2) | 1.04±0.46 (0) | 1.00±0.00 (0) | 1.03±0.42 (2) | 1.02±0.42 (0) | 1.03±0.43 (0) | <b>1.03±0.43 (4)</b>  |

\* Base counts are calculated relative to this sample (i.e. 1.00±0.00 (0) is expected/trivial), \*\*excluding sample 326.

**Table S30.** Intervals within which 95% of the relative base counts of wild-type RefSeq exons (two copies, displayed as black dots in Supplementary Figure S26) lie (calculated according to the Student's *t* distribution as the mean of *n* values ± critical *t* value ( $t_{crit,n-1}$ ) × *SD* using the *n* values indicated in the table and the corresponding  $t_{crit}$  values). The number of dots with relative base counts >3 (out of a total of ~800'000 dots with relative base counts derived from ~160'000 RefSeq exons of five DNA samples, “grey dots”) and thus not shown in Supplementary Figure S26 is given in parentheses.

|                     | <b>44</b>                        | <b>280</b>                        | <b>326*</b>                     | <b>2905</b>                      | <b>7344</b>                       | <b>7739</b>                     | <b>Total**</b>                           |
|---------------------|----------------------------------|-----------------------------------|---------------------------------|----------------------------------|-----------------------------------|---------------------------------|------------------------------------------|
| <b>Agilent_V1</b>   | 1.01±0.38 (24)<br><i>n</i> = 112 | 1.00±0.31 (19)<br><i>n</i> = 111  | 1.00±0.00 (0)<br><i>n</i> = 154 | 1.00±0.34 (18)<br><i>n</i> = 132 | 0.98±0.39 (12)<br><i>n</i> = 114  | 0.99±0.27 (11)<br><i>n</i> = 72 | <b>1.00±0.34 (84)</b><br><i>n</i> = 541  |
| <b>Agilent_V2</b>   | 0.99±0.30 (24)<br><i>n</i> = 114 | 0.98±0.27 (29)<br><i>n</i> = 112  | 1.00±0.00 (0)<br><i>n</i> = 157 | 1.02±0.32 (21)<br><i>n</i> = 134 | 0.96±0.37 (13)<br><i>n</i> = 116  | 1.00±0.23 (15)<br><i>n</i> = 73 | <b>0.99±0.31 (102)</b><br><i>n</i> = 549 |
| <b>NimbleGen_V1</b> | 1.02±0.45 (92)<br><i>n</i> = 121 | 0.94±0.51 (52)<br><i>n</i> = 111  | 1.00±0.00 (0)<br><i>n</i> = 162 | 1.04±0.44 (51)<br><i>n</i> = 124 | 1.12±0.63 (140)<br><i>n</i> = 105 | 1.12±0.69 (84)<br><i>n</i> = 72 | <b>1.04±0.54 (419)</b><br><i>n</i> = 533 |
| <b>NimbleGen_V3</b> | 0.98±0.41 (21)<br><i>n</i> = 118 | 0.96±0.43 (476)<br><i>n</i> = 113 | 1.00±0.00 (0)<br><i>n</i> = 161 | 0.97±0.39 (24)<br><i>n</i> = 124 | 0.96±0.39 (34)<br><i>n</i> = 105  | 0.98±0.36 (16)<br><i>n</i> = 74 | <b>0.97±0.39 (571)</b><br><i>n</i> = 534 |
| <b>Illumina_V1</b>  | 1.03±0.41 (49)<br><i>n</i> = 129 | 1.05±0.45 (53)<br><i>n</i> = 113  | 1.00±0.00 (0)<br><i>n</i> = 173 | 1.11±0.41 (41)<br><i>n</i> = 134 | 1.12±0.46 (45)<br><i>n</i> = 115  | 1.03±0.45 (20)<br><i>n</i> = 75 | <b>1.07±0.44 (208)</b><br><i>n</i> = 566 |
| <b>Illumina_V4</b>  | 1.00±0.50 (30)<br><i>n</i> = 117 | 1.02±0.49 (29)<br><i>n</i> = 111  | 1.00±0.00 (0)<br><i>n</i> = 154 | 1.01±0.44 (28)<br><i>n</i> = 119 | 0.97±0.37 (32)<br><i>n</i> = 100  | 1.02±0.40 (26)<br><i>n</i> = 73 | <b>1.00±0.44 (145)</b><br><i>n</i> = 520 |

\* Base counts are calculated relative to this sample (i.e. 1.00±0.00 (0) is expected/trivial), \*\*excluding sample 326.
